# Supplementary material for: Ruthenium-catalyzed C–H amination of aroylsilanes
Source: Royal Society of Chemistry journal article supplement (doi:10.1039/d1ob00935d), 2021-01-01

# Ruthenium-Catalyzed C-H Amination of Aroylsilanes

Feifei Yu, Wenzhou Shen, Yaling Sun, Yilei Liao, Shuqi Jin, Xiunan Lu, Rui He,\* Liangjun  
Zhong,\* Guofu Zhong and Jian Zhang\*

*Email: zhangjian@hznu.edu.cn; zymdxx@163.com; heruiminli@sina.com*

## Table of Contents

|                                               |      |
|-----------------------------------------------|------|
| General Methods                               | S-2  |
| General Procedure for Catalytic C-H Amination | S-3  |
| Characterization Data                         | S-4  |
| Deuterium-Labeled Experiments                 | S-18 |
| KIE Experiments                               | S-23 |
| Competition Reaction                          | S-27 |
| Synthetic Application                         | S-28 |
| References                                    | S-30 |
| NMR Spectra                                   | S-31 |

## General Methods

Analytical thin layer chromatography (TLC) was performed using Merck 60 F254 precoated silica gel plate (0.2 mm thickness). Subsequent to elution, plates were visualized using UV radiation (254 nm) on Spectroline Model ENF-24061/F254 nm. Further visualization was possible by staining with basic solution of potassium permanganate or acidic solution of ceric molybdate. Flash column chromatography was performed using Merck aluminium oxide 90 active neutral with freshly distilled solvents. Columns were typically packed as slurry and equilibrated with the appropriate solvent system prior to use. Proton nuclear magnetic resonance spectra ( $^1\text{H}$  NMR) were recorded on Bruker AMX400 and 500 MHz spectrophotometer ( $\text{CDCl}_3$  as solvent). Chemical shifts for  $^1\text{H}$  NMR spectra are reported as  $\delta$  in units of parts per million (ppm) downfield from  $\text{SiMe}_4$  ( $\delta$  0.0) and relative to the signal of chloroform-*d* ( $\delta$  7.26, singlet). Multiplicities were given as: s (singlet), d (doublet), t (triplet), dd (doublets of doublet) or m (multiplets). The number of protons (n) for a given resonance is indicated by nH. Coupling constants are reported as a *J* value in Hz. Carbon nuclear magnetic resonance spectra ( $^{13}\text{C}$  NMR) are reported as  $\delta$  in units of parts per million (ppm) downfield from  $\text{SiMe}_4$  ( $\delta$  0.0) and relative to the signal of chloroform-*d* ( $\delta$  77.0, triplet). Mass spectrometry was performed by Waters Q-ToF Premier Micromass instrument, using Electro Spray Ionization (ESI) mode. IR spectra were recorded as thin films on KBr or NaCl plates on a Bio-Rad FTS 165 FTIR spectrometer and are reported in frequency of absorption ( $\text{cm}^{-1}$ ). Other reagents, unless otherwise noted below, are commercially available from Alfa Aesar (China) Chemical Co., Ltd. and used without further purification. Acylsilanes were prepared by reported methods.<sup>1-2</sup>

### General Procedure for Ru-Catalyzed C-H Amination

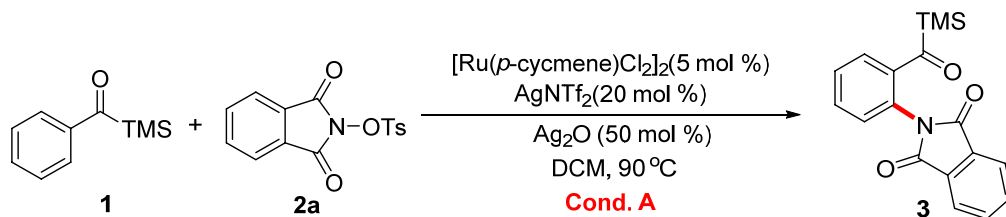

An oven-dried vial was charged with  $[\text{Ru}(p\text{-cymene)Cl}_2]_2$  (5 mol %, 0.005 mmol),  $\text{AgNTf}_2$  (20 mol %, 0.02 mmol),  $\text{Ag}_2\text{O}$  (50 mol %, 0.05 mmol), **2a** (0.2 mmol, 63.4 mg) and DCM (0.7 mL). Then, acylsilane **1** (0.1 mmol, 17.8 mg) was added into the solution. The vial was sealed under argon and heated to 90 °C with stirring for 18 hours. After cooling down, the mixture was directly applied to a flash column chromatography (ethyl acetate/petroleum ether mixtures) on silica gel to afford **3**.

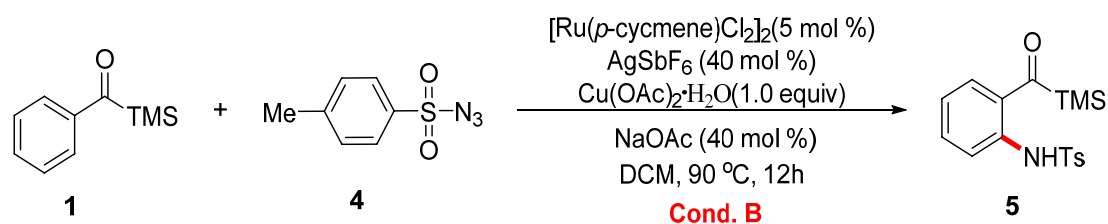

An oven-dried vial was charged with  $[\text{Ru}(p\text{-cymene)Cl}_2]_2$  (5 mol %, 0.005 mmol),  $\text{AgSbF}_6$  (40 mol %, 0.04 mmol),  $\text{Cu(OAc)}_2\cdot\text{H}_2\text{O}$  (1.0 eq, 0.1 mmol),  $\text{NaOAc}$  (40 mol %, 0.04 mmol) and DCM (0.7 mL). Then, acylsilane **1** (0.1 mmol, 17.8 mg) and **4** (0.2 mmol, 39.4 mg) were added into the solution. The vial was sealed under argon and heated to 90 °C with stirring for 12 hours. After cooling down, the mixture was directly applied to a flash column chromatography (ethyl acetate/petroleum ether mixtures) on silica gel to afford **5**.

## Characterization Data

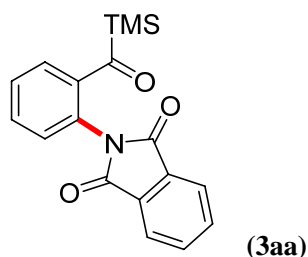

### 2-(2-((trimethylsilyl)carbonyl)phenyl)isoindoline-1,3-dione

Following the general experiment procedure, **3aa** was obtained as a yellow solid (77%, 25.0 mg), m.p.:155.3°C. **<sup>1</sup>H NMR** (500 MHz, CDCl<sub>3</sub>): δ = 11.53 (s, 1H), δ = 7.80 (dd, *J* = 7.5, 1.5 Hz, 1H), 7.70 (d, *J* = 8.5Hz, 2H), 7.65 (dd, *J* = 8.5, 1.0 Hz, 1H), 7.41 (td, *J* = 10.5, 1.5 Hz, 2H), 7.21 (d, *J* = 8.0 Hz, 1H), 7.13 (td, *J* = 7.5, 1 Hz, 1H), 2.35 (s, 3H), 0.31 (s, 9H). **<sup>13</sup>C NMR** (125 MHz, CDCl<sub>3</sub>): δ = 240.21, 169.32, 141.48, 136.16, 133.96, 133.51, 131.86, 131.02, 130.34, 128.60, 125.58, 2.91. **HR-MS** (ESI): *m/z* calculated for C<sub>20</sub>H<sub>27</sub>NO<sub>3</sub>SSi: [M+H]<sup>+</sup>: 324.1051, found: 324.1054. **FTIR** (KBr, cm<sup>-1</sup>): 3384.70, 2945.79, 2828.04, 1647.66, 1534.23, 1403.74, 1028.83.

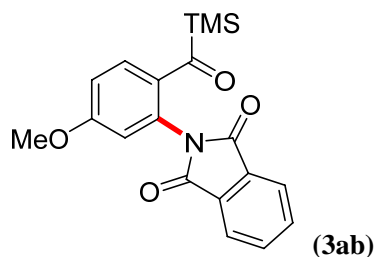

### 2-(5-methoxy-2-((trimethylsilyl)carbonyl)phenyl)isoindoline-1,3-dione

Following the general experiment procedure, **3ab** was obtained as a yellow solid (60%, 21.2 mg), m.p.:137.9°C. **<sup>1</sup>H NMR** (500 MHz, CDCl<sub>3</sub>): δ = 7.92 (dd, *J* = 5.0, 3.0 Hz, 2H), 7.84 (d, *J* = 8.5 Hz, 1H), 7.77 (dd, *J* = 5.5, 3.1 Hz, 2H), 7.06 (dd, *J* = 8.5, 2.5 Hz, 1H), 6.88 (d, *J* = 2.5 Hz, 1H), 3.89 (s, 3H), 0.31 (s, 9H). **<sup>13</sup>C NMR** (125 MHz, CDCl<sub>3</sub>): δ = 236.86, 169.10, 163.75, 135.81, 134.33, 133.83, 133.62, 130.62, 125.34, 118.07, 115.36, 57.32, 2.62. **HR-MS** (ESI): *m/z* calculated for C<sub>19</sub>H<sub>19</sub>NO<sub>4</sub>Si: [M+H]<sup>+</sup>: 354.1156, found:354.1156. **FTIR** (KBr, cm<sup>-1</sup>): 3383.49, 2973.83, 2938.60, 2839.25, 1476.64, 1392.52, 1032.68, 1016.82.

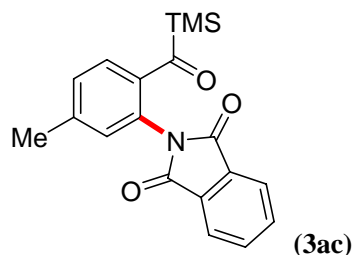

### 2-(5-methyl-2-((trimethylsilyl)carbonyl)phenyl)isoindoline-1,3-dione

Following the general experiment procedure, **3ac** was obtained as a yellow solid (62%, 21 mg), m.p.: 133.2°C. <sup>1</sup>H NMR (500 MHz, CDCl<sub>3</sub>): δ = 7.92-7.89 (m, 2H), 7.78-7.74 (m, 2H), 7.71 (d, *J* = 7.5 Hz, 1H), 7.36 (d, *J* = 8.0 Hz, 1H), 7.18 (s, 1H), 2.45 (s, 3H), 0.31 (s, 9H). <sup>13</sup>C NMR (125 MHz, CDCl<sub>3</sub>): δ = 239.15, 169.38, 144.53, 138.47, 135.96, 133.95, 132.71, 131.85, 131.04, 128.58, 125.45, 23.23, 2.79. HR-MS (ESI): *m/z* calculated for C<sub>19</sub>H<sub>19</sub>NO<sub>3</sub>Si: [M+H]<sup>+</sup>: 338.1207, found: 338.121. FTIR (KBr, cm<sup>-1</sup>): 3731.69, 3627.12, 3383.79, 2922.90, 1734.58, 1557.44, 1403.00, 1026.47.

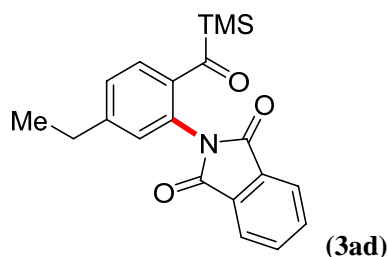

### 2-(5-ethyl-2-((trimethylsilyl)carbonyl)phenyl)isoindoline-1,3-dione

Following the general experiment procedure, **3ad** was obtained as a yellow solid (70%, 24.5 mg), m.p.: 155.0°C. <sup>1</sup>H NMR (500 MHz, CDCl<sub>3</sub>): δ = 7.92 - 7.89 (m, 2H), 7.78-7.73 (m, 3H), 7.39 (dd, *J* = 8.0, 1.5 Hz, 1H), 7.20 (d, *J* = 1Hz, 1H), 2.76 (q, *J* = 7.5 Hz, 2H), 1.39 (t, *J* = 7.5 Hz, 3H), 0.32 (s, 9H). <sup>13</sup>C NMR (125 MHz, CDCl<sub>3</sub>): δ = 239.11, 169.37, 150.54, 138.59, 135.94, 133.95, 131.95, 131.56, 129.76, 128.64, 125.41, 30.39, 16.53, 2.77. HR-MS (ESI): *m/z* calculated for C<sub>20</sub>H<sub>21</sub>NO<sub>3</sub>Si: [M+H]<sup>+</sup>: 352.1363, found: 352.1364. FTIR (KBr, cm<sup>-1</sup>): 3850.87, 3748.24, 3667.61, 3564.65, 2357.70, 1731.78, 1557.18, 1028.04.

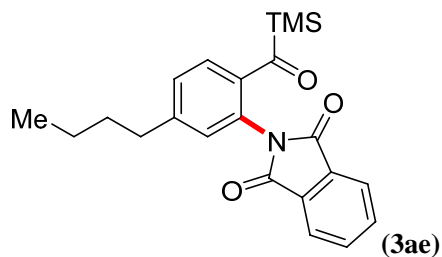

### 2-(5-butyl-2-((trimethylsilyl)carbonyl)phenyl)isoindoline-1,3-dione

Following the general experiment procedure, **3ae** was obtained as a yellow solid (65%, 23.8 mg), m.p.: 165.4°C. <sup>1</sup>H NMR (500 MHz, CDCl<sub>3</sub>): δ = 7.90 (dd, *J* = 5.5, 3.0 Hz, 2H), 7.77-7.72 (m, 3H), 7.37 (dd, *J* = 7.5, 1.5 Hz, 1H), 7.19 (d, *J* = 1.5 Hz, 1H), 2.70 (t, *J* = 7.0 Hz, 2H), 1.69-1.63 (ddd, *J* = 9.5, 5.0, 2.0 Hz, 2H), 1.40 (dd, *J* = 15.0, 7.5 Hz, 2H), 0.94 (t, *J* = 7.5 Hz, 3H), 0.32 (s, 9H). <sup>13</sup>C NMR (125 MHz, CDCl<sub>3</sub>): δ = 239.10, 169.34, 149.37, 138.54, 135.93, 133.94, 132.00, 131.84, 130.25, 128.57, 125.39, 37.17, 34.68, 24.12, 15.64, 2.77. HR-MS (ESI): *m/z* calculated for C<sub>22</sub>H<sub>25</sub>F<sub>3</sub>NO<sub>3</sub>Si: [M+H]<sup>+</sup>: 380.1676, found: 380.1673. FTIR (KBr, cm<sup>-1</sup>): 3850.96, 3708.81, 3646.24, 3422.68, 2357.60, 1651.54, 1557.31, 1021.07.

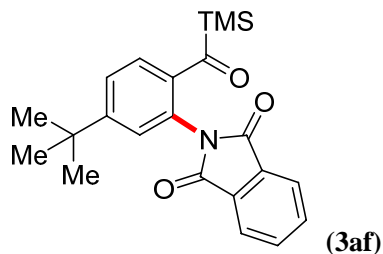

### 2-(5-(tert-butyl)-2-((trimethylsilyl)carbonyl)phenyl)isoindoline-1,3-dione

Following the general experiment procedure, **3af** was obtained as a yellow solid (80%, 30 mg), m.p.: 196.0°C. <sup>1</sup>H NMR (500 MHz, CDCl<sub>3</sub>): δ = 7.91 (dd, *J* = 5.5, 3.0 Hz, 2H), 7.78- 7.75 (m, 3H), 7.57 (dd, *J* = 8.0, 2.0 Hz, 1H), 7.35 (d, *J* = 2.0 Hz, 1H), 1.37 (s, 9H), 0.32 (s, 9H). <sup>13</sup>C NMR (125 MHz, CDCl<sub>3</sub>) : δ = 238.97, 169.39, 157.48, 138.17, 135.89, 133.99, 131.80, 129.30, 128.45, 127.31, 125.38, 36.89, 32.77, 32.69, 2.75. HR-MS (ESI): *m/z* calculated for C<sub>22</sub>H<sub>25</sub>NO<sub>3</sub>Si: [M+H]<sup>+</sup>: 380.1676, found: 380.1673. FTIR (KBr, cm<sup>-1</sup>): 3851.23, 3673.83, 3565.06, 3417.06, 2957.39, 1651.67, 1457.01, 1032.54.

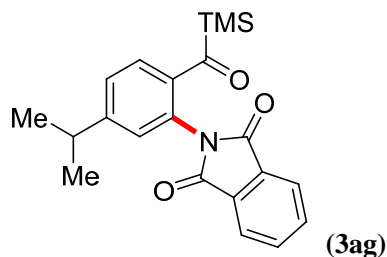

### 2-(5-isopropyl-2-((trimethylsilyl)carbonyl)phenyl)isoindoline-1,3-dione

Following the general experiment procedure, **3ag** was obtained as a yellow solid (69%, 25 mg), m.p.: 143.8 °C.  $^1\text{H NMR}$  (500 MHz,  $\text{CDCl}_3$ ):  $\delta$  = 7.91 (dd,  $J$  = 5.5, 3.0 Hz, 2H), 7.77-7.75 (m, 3H), 7.42 (dd,  $J$  = 8.0, 1.6 Hz, 1H), 7.22 (d,  $J$  = 1.5 Hz, 1H), 3.00 (dt,  $J$  = 14, 7.0 Hz, 1H), 1.31 (d,  $J$  = 6.9 Hz, 6H), 0.32 (s, 9H).  $^{13}\text{C NMR}$  (125 MHz,  $\text{CDCl}_3$ ):  $\delta$  = 239.01, 169.36, 155.10, 138.61, 135.91, 133.94, 132.02, 130.34, 128.65, 128.33, 125.39, 35.77, 25.29, 2.76. **HR-MS** (ESI):  $m/z$  calculated for  $\text{C}_{21}\text{H}_{23}\text{NO}_3\text{Si}$ :  $[\text{M}+\text{H}]^+$ : 366.1520, found: 366.1522. **FTIR** (KBr,  $\text{cm}^{-1}$ ): 3851.60, 3742.79, 3673.89, 3444.21, 1682.51, 1557.45, 1403.03, 1016.82.

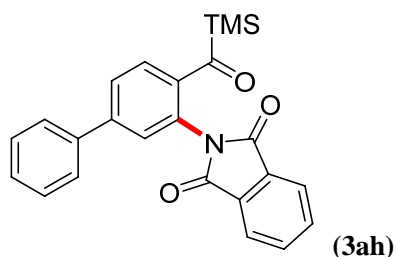

### 2-(4-((trimethylsilyl)carbonyl)-[1,1'-biphenyl]-3-yl)isoindoline-1,3-dione

Following the general experiment procedure, **3ah** was obtained as a yellow solid (65%, 26 mg), m.p.: 159.0 °C.  $^1\text{H NMR}$  (500 MHz,  $\text{CDCl}_3$ ):  $\delta$  = 7.93 (dd,  $J$  = 5.5, 3.0 Hz, 2H), 7.86 (d,  $J$  = 8.0 Hz, 1H), 7.79-7.76 (m, 3H), 7.65-7.63 (m, 2H), 7.60 (d,  $J$  = 1.5 Hz, 1H), 7.47 (t,  $J$  = 7.5 Hz, 2H), 7.40 (t,  $J$  = 7.3 Hz, 1H), 0.36 (s, 9H).  $^{13}\text{C NMR}$  (125 MHz,  $\text{CDCl}_3$ ):  $\delta$  = 239.37, 169.28, 146.63, 140.83, 139.51, 136.07, 133.93, 131.99, 130.78, 130.72, 130.21, 129.16, 129.12, 128.75, 125.52, 2.80. **HR-MS** (ESI):  $m/z$  calculated for  $\text{C}_{24}\text{H}_{21}\text{NO}_3\text{Si}$ :  $[\text{M}+\text{H}]^+$ : 400.1363, found: 400.1361. **FTIR** (KBr,  $\text{cm}^{-1}$ ): 3868.36, 3742.97, 3471.24, 2359.32, 1681.31, 1557.66, 1398.11, 668.09.

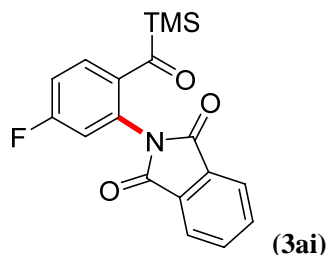

### 2-(5-fluoro-2-((trimethylsilyl)carbonyl)phenyl)isoindoline-1,3-dione

Following the general experiment procedure, **3ai** was obtained as a yellow solid (65%, 22.2 mg), m.p.: 133.9°C.  $^1\text{H NMR}$  (500 MHz,  $\text{CDCl}_3$ ):  $\delta$  = 7.92 (q,  $J$  = 3.0 Hz, 2H), 7.80 -7.75 (m, 3H), 7.26 -7.23 (m, 1H), 7.15 (dd,  $J$  = 9.0, 2.5 Hz, 1H), 0.33 (s, 9H).  $^{13}\text{C NMR}$  (125 MHz,  $\text{CDCl}_3$ ):  $\delta$  = 238.54, 168.89, 165.47 (d,  $J_{\text{C-F}}$  = 252.6 Hz), 137.88 (d,  $J_{\text{C-F}}$  = 3.6 Hz), 136.34, 133.80, 133.02 (d,  $J_{\text{C-F}}$  = 9.7 Hz), 130.87 (d,  $J_{\text{C-F}}$  = 10.9 Hz), 125.74, 119.69 (d,  $J_{\text{C-F}}$  = 23.5 Hz), 117.23 (d,  $J_{\text{C-F}}$  = 21.1 Hz), 2.90. **HR-MS** (ESI):  $m/z$  calculated for  $\text{C}_{18}\text{H}_{16}\text{NO}_3\text{Si}$ :  $[\text{M}+\text{H}]^+$ : 342.0956, found: 342.0950. **FTIR** (KBr,  $\text{cm}^{-1}$ ): 3667.90, 3564.88, 3472.93, 3383.78, 2358.15, 1731.78, 1684.11, 1403.01, 1028.04.

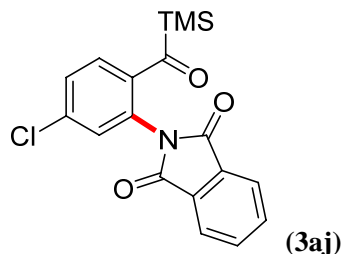

### 2-(5-chloro-2-((trimethylsilyl)carbonyl)phenyl)isoindoline-1,3-dione

Following the general experiment procedure, **3aj** was obtained as a yellow solid (49%, 17.5 mg), m.p.: 130.9°C.  $^1\text{H NMR}$  (500 MHz,  $\text{CDCl}_3$ ):  $\delta$  = 7.92 (dd,  $J$  = 5.5, 3.0 Hz, 2H), 7.78 (dd,  $J$  = 5.5, 3.5 Hz, 2H), 7.68 (d,  $J$  = 8.5 Hz, 1H), 7.53 (dd,  $J$  = 8.0, 2.0 Hz, 1H), 7.42 (d,  $J$  = 2.0 Hz, 1H), 0.32 (s, 9H).  $^{13}\text{C NMR}$  (125 MHz,  $\text{CDCl}_3$ ):  $\delta$  = 239.11, 168.95, 139.82, 139.15, 136.41, 133.83, 132.21, 131.96, 130.51, 130.00, 125.79, 2.96. **HR-MS** (ESI):  $m/z$  calculated for  $\text{C}_{18}\text{H}_{16}\text{ClNO}_3\text{Si}$ :  $[\text{M}+\text{H}]^+$ : 358.0661, found: 358.0655. **FTIR** (KBr,  $\text{cm}^{-1}$ ): 3851.10, 3742.44, 3646.24, 3184.11, 1651.56, 1557.28, 1504.96, 1402.83, 1036.45.



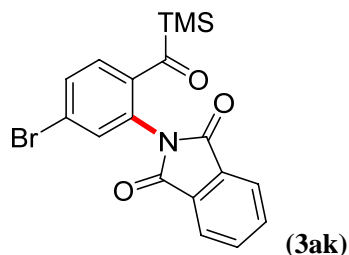

### 2-(5-bromo-2-((trimethylsilyl)carbonyl)phenyl)isoindoline-1,3-dione

Following the general experiment procedure, **3ak** was obtained as a yellow solid (42%, 17 mg), m.p.:75.9°C.  $^1\text{H NMR}$  (500 MHz,  $\text{CDCl}_3$ ):  $\delta$  = 7.91 (dd,  $J$  = 5.0, 3.0 Hz, 2H), 7.78 (dd,  $J$  = 5.5, 3.5 Hz, 2H), 7.69 (dd,  $J$  = 8.0, 1.5 Hz, 1H), 7.60 (d,  $J$  = 8.0 Hz, 1H), 7.58 (d,  $J$  = 1.5 Hz, 1H), 0.32 (s, 9H).  $^{13}\text{C NMR}$  (125 MHz,  $\text{CDCl}_3$ ):  $\delta$  = 239.29, 168.95, 140.27, 136.43, 135.02, 133.83, 133.48, 132.01, 129.94, 127.20, 125.80, 2.96. **HR-MS** (ESI):  $m/z$  calculated for  $\text{C}_{18}\text{H}_{16}\text{BrNO}_3\text{Si}$ :  $[\text{M}+\text{H}]^+$ : 402.0156, found:402.0150. **FTIR** (KBr,  $\text{cm}^{-1}$ ): 3686.55, 3654.57, 3417.41, 3209.36, 2958.12, 1731.78, 1650.47, 1555.14, 1025.23, 500.24.

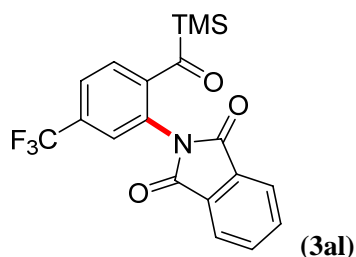

### 2-(5-(trifluoromethyl)-2-((trimethylsilyl)carbonyl)phenyl)isoindoline-1,3-dione

Following the general experiment procedure, **3al** was obtained as a yellow solid (43%, 16.5 mg), m.p.:163.8°C.  $^1\text{H NMR}$  (500 MHz,  $\text{CDCl}_3$ ):  $\delta$  = 7.92 (dd,  $J$  = 5.5, 3.0 Hz, 2H), 7.81 -7.77 (m, 4H), 7.70 (s, 1H), 0.34 (s, 9H).  $^{13}\text{C NMR}$  (125 MHz,  $\text{CDCl}_3$ ):  $\delta$  = 168.77, 144.55, 136.48, 135.0 (d,  $J_{\text{C-F}}$  = 33.2 Hz), 133.66, 130.31, 129.21, 128.68 (q,  $J_{\text{C-F}}$  = 3.7 Hz), 127.06 (q,  $J_{\text{C-F}}$  = 3.7 Hz), 125.78, 122.84 (q,  $J_{\text{C-F}}$  = 271.2 Hz), 31.58, 2.90. **HR-MS** (ESI):  $m/z$  calculated for  $\text{C}_{19}\text{H}_{16}\text{F}_3\text{NO}_3\text{Si}$ :  $[\text{M}+\text{H}]^+$ : 392.0924, found: 392.0921. **FTIR** (KBr,  $\text{cm}^{-1}$ ): 3673.76, 3417.35, 3209.57, 2923.90, 1731.92, 1402.97, 1137.38, 854.21, 716.82.

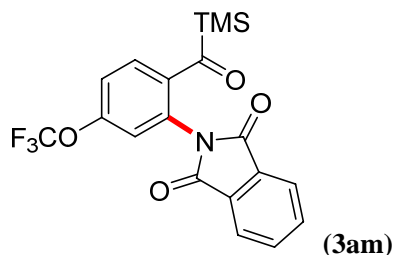

### 2-(5-(trifluoromethoxy)-2-((trimethylsilyl)carbonyl)phenyl)isoindoline-1,3-dione

Following the general experiment procedure, **3am** was obtained as a yellow solid (52%, 20.7 mg), m.p.: 163.8 °C. <sup>1</sup>H NMR (500 MHz, CDCl<sub>3</sub>): δ = 7.92 (dd, *J* = 5.5, 3.0 Hz, 2H), 7.80 - 7.76 (m, 3H), 7.39 (ddd, *J* = 8.5, 2.5, 1.5 Hz, 1H), 7.29 (d, *J* = 1.5 Hz, 1H), 0.34 (s, 9H). <sup>13</sup>C NMR (125 MHz, CDCl<sub>3</sub>): δ = 168.84, 152.53, 152.52, 139.79, 136.49, 133.79, 132.19, 130.56, 125.84, 124.15, 121.74, 2.97. HR-MS (ESI): *m/z* calculated for C<sub>19</sub>H<sub>16</sub>F<sub>3</sub>NO<sub>4</sub>Si: [M+H]<sup>+</sup>: 408.0873, found: 408.0866. FTIR (KBr, cm<sup>-1</sup>): 3851.39, 3673.79, 3564.97, 3417.87, 1737.38, 1455.50, 1398.00, 1028.04.

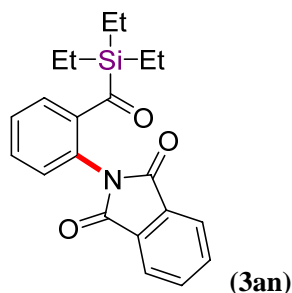

### 2-(2-((triethylsilyl)carbonyl)phenyl)isoindoline-1,3-dione

Following the general experiment procedure, **3an** was obtained as a yellow solid (50%, 18.5 mg), m.p.: 123.0 °C. <sup>1</sup>H NMR (500 MHz, CDCl<sub>3</sub>): δ = 7.91 (dd, *J* = 5.5, 3.0 Hz, 2H), 7.79-7.75 (m, 3H), 7.62-7.55 (m, 2H), 7.37 (dd, *J* = 7.5, 1.5 Hz, 1H), 0.97 (t, *J* = 8.0 Hz, 9H), 0.88-0.83 (m, 6H). <sup>13</sup>C NMR (125 MHz, CDCl<sub>3</sub>): δ = 237.30, 166.71, 139.46, 133.42, 131.35, 130.94, 129.50, 128.58, 127.88, 125.85, 122.87, 6.48, 2.69. HR-MS (ESI): *m/z* calculated for C<sub>21</sub>H<sub>23</sub>NO<sub>3</sub>Si: [M+H]<sup>+</sup>: 366.1520, found: 366.1521. FTIR (KBr, cm<sup>-1</sup>): 3667.53, 3626.59, 3585.11, 3564.58, 1682.33, 1633.72, 1402.94, 1028.04.

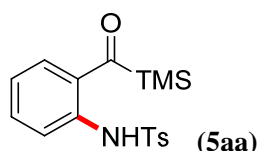

#### 4-methyl-N-(2-((trimethylsilyl)carbonyl)phenyl)benzenesulfonamide

Following the general experiment procedure, **5aa** was obtained as a yellow liquid (79%, 27 mg).

**<sup>1</sup>H NMR** (500 MHz, CDCl<sub>3</sub>): δ = 11.53 (s, 1H), 7.80 (dd, *J* = 7.5, 1.54 Hz, 1H), 7.70 (d, *J* = 8.5 Hz, 2H), 7.65 (dd, *J* = 8.0, 0.5 Hz, 1H), 7.43-7.40 (m, 1H), 7.20 (d, *J* = 8.0 Hz, 2H), 7.13 (td, *J* = 7.5, 1.0 Hz, 1H), 2.35 (s, 3H), 0.31 (s, 9H). **<sup>13</sup>C NMR** (125 MHz, CDCl<sub>3</sub>): δ = 241.44, 145.23, 138.99, 138.12, 135.53, 135.36, 131.01, 128.68, 128.54, 124.08, 120.98, 22.93. **HR-MS** (ESI): *m/z* calculated for C<sub>17</sub>H<sub>21</sub>NO<sub>3</sub>SSi: [M+H]<sup>+</sup>: 348.1084, found: 348.1080. **FTIR** (KBr, cm<sup>-1</sup>): 3852.36, 3626.72, 3383.51, 1651.53, 1538.26, 1403.03, 1026.73, 963.73.

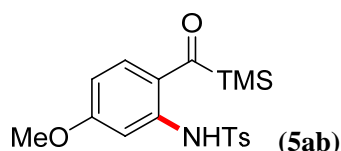

#### N-(5-methoxy-2-((trimethylsilyl)carbonyl)phenyl)-4-methylbenzenesulfonamide

Following the general experiment procedure, **5ab** was obtained as a yellow liquid (65%, 25 mg).

**<sup>1</sup>H NMR** (500 MHz, CDCl<sub>3</sub>): δ = 12.10 (s, 1H), 7.73 (dd, *J* = 14.5, 8.5 Hz, 3H), 7.23 (d, *J* = 8.0 Hz, 2H), 7.14 (d, *J* = 2.5 Hz, 1H), 6.58 (dd, *J* = 9.0, 2.5 Hz, 1H), 3.82 (s, 3H), 2.36 (s, 3H), 0.31 (s, 9H). **<sup>13</sup>C NMR** (125 MHz, CDCl<sub>3</sub>): δ = 165.12, 145.12, 142.00, 138.06, 137.51, 130.91, 128.62, 122.51, 110.01, 104.41, 56.92, 22.82, 2.34. **HR-MS** (ESI): *m/z* calculated for C<sub>18</sub>H<sub>23</sub>NO<sub>4</sub>SSi: [M+H]<sup>+</sup>: 378.1190, found: 378.1189. **FTIR** (KBr, cm<sup>-1</sup>): 3626.63, 3585.09, 3417.52, 2920.56, 1684.11, 1651.55, 1455.18, 1162.62, 1032.53.

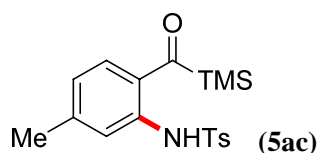

#### 4-methyl-N-(5-methyl-2-((trimethylsilyl)carbonyl)phenyl)benzenesulfonamide

Following the general experiment procedure, **5ac** was obtained as a yellow liquid (58%, 21 mg).

**<sup>1</sup>H NMR** (500 MHz, CDCl<sub>3</sub>): δ = 11.62 (s, 1H), 7.61 (dd, *J* = 20.0, 7.0 Hz, 3H), 7.46 (s, 1H), 7.21

(d,  $J = 7.5$  Hz, 2H), 6.92 (d,  $J = 8.0$  Hz, 1H), 2.35 (d,  $J = 9.0$  Hz, 6H), 0.30 (s, 9H).  $^{13}\text{C}$  NMR (125 MHz,  $\text{CDCl}_3$ ):  $\delta = 240.17, 146.88, 145.06, 139.23, 138.25, 135.39, 130.93, 128.65, 126.53, 124.90, 121.20, 23.52, 22.89, 2.43$ . **HR-MS** (ESI):  $m/z$  calculated for  $\text{C}_{18}\text{H}_{23}\text{NO}_3\text{SSi}$ :  $[\text{M}+\text{H}]^+$ : 362.1241, found: 362.1232. **FTIR** (KBr,  $\text{cm}^{-1}$ ): 3851.29, 3742.57, 3646.43, 2358.46, 1651.56, 1455.31, 1028.04, 667.77.

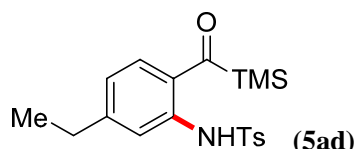

#### **N-(5-ethyl-2-((trimethylsilyl)carbonyl)phenyl)-4-methylbenzenesulfonamide**

Following the general experiment procedure, **5ad** was obtained as a yellow liquid (60%, 23 mg).

$^1\text{H}$  NMR (500 MHz,  $\text{CDCl}_3$ ):  $\delta = 11.64$  (s, 1H), 7.71 (dd,  $J = 8.0, 2.5$  Hz, 3H), 7.49 (d,  $J = 1.0$  Hz, 1H), 7.20 (d,  $J = 8.5$  Hz, 2H), 6.94 (dd,  $J = 8.0, 1.0$  Hz, 1H), 2.63 (q,  $J = 7.5$  Hz, 2H), 2.35 (s, 3H), 1.20 (t,  $J = 7.5$  Hz, 3H), 0.30 (s, 9H).  $^{13}\text{C}$  NMR (125 MHz,  $\text{CDCl}_3$ ):  $\delta = 240.15, 152.90, 145.05, 139.31, 138.18, 135.52, 130.87, 128.72, 126.62, 123.61, 120.00, 30.63, 22.87, 16.18, 2.41$ . **HR-MS** (ESI):  $m/z$  calculated for  $\text{C}_{19}\text{H}_{25}\text{NO}_3\text{SSi}$ :  $[\text{M}+\text{H}]^+$ : 376.1397, found: 376.1393. **FTIR** (KBr,  $\text{cm}^{-1}$ ): 3851.26, 3646.51, 3444.39, 2358.27, 1651.69, 1557.48, 1402.83, 1022.43.

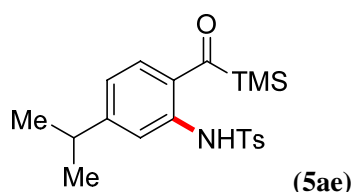

#### **N-(5-isopropyl-2-((trimethylsilyl)carbonyl)phenyl)-4-methylbenzenesulfonamide**

Following the general experiment procedure, **5ae** was obtained as a yellow liquid (60%, 23 mg).

$^1\text{H}$  NMR (500 MHz,  $\text{CDCl}_3$ ):  $\delta = 11.63$  (s, 1H), 7.71 (dd,  $J = 8.0, 3.0$  Hz, 3H), 7.51 (d,  $J = 1.5$  Hz, 1H), 7.20 (d,  $J = 8.0$  Hz, 2H), 6.96 (dd,  $J = 8.0, 1.5$  Hz, 1H), 2.91-2.86 (m, 1H), 2.35 (s, 3H), 1.21 (d,  $J = 7.0$  Hz, 6H), 0.30 (s, 9H).  $^{13}\text{C}$  NMR (125 MHz,  $\text{CDCl}_3$ ):  $\delta = 240.15, 157.38, 145.08, 139.31, 138.06, 135.60, 130.84, 128.77, 126.64, 122.17, 118.61, 35.87, 24.71, 22.87, 2.41$ . **HR-MS** (ESI):  $m/z$  calculated for  $\text{C}_{20}\text{H}_{27}\text{NO}_3\text{SSi}$ :  $[\text{M}+\text{H}]^+$ : 390.1550, found: 390.1544. **FTIR** (KBr,  $\text{cm}^{-1}$ ): 3686.48, 3444.48, 3170.89, 1651.56, 1557.22, 1402.85, 1025.15, 449.20.

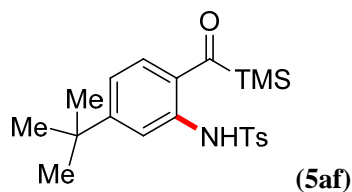

**N-(5-(tert-butyl)-2-((trimethylsilyl)carbonyl)phenyl)-4-methylbenzenesulfonamide**

Following the general experiment procedure, **5af** was obtained as a yellow liquid (53%, 21 mg).

**<sup>1</sup>H NMR** (500 MHz, CDCl<sub>3</sub>): δ = 11.62 (s, 1H), 7.72 (dd, *J* = 8.5, 2.5 Hz, 3H), 7.65 (d, *J* = 2.0 Hz, 1H), 7.21 (d, *J* = 8.0 Hz, 2H), 7.11 (dd, *J* = 8.5, 1.5 Hz, 1H), 2.35 (s, 3H), 1.28 (s, 9H), 0.31 (s, 9H). **<sup>13</sup>C NMR** (125 MHz, CDCl<sub>3</sub>): δ = 240.10, 159.59, 145.06, 139.07, 138.17, 135.25, 130.84, 128.86, 126.19, 120.94, 117.81, 36.88, 32.18, 22.86, 2.41. **HR-MS** (ESI): *m/z* calculated for C<sub>21</sub>H<sub>29</sub>NO<sub>3</sub>SSi: [M+H]<sup>+</sup>: 404.1710, found: 404.1702. **FTIR** (KBr, cm<sup>-1</sup>): 3851.09, 3417.32, 3209.05, 2957.01, 1651.51, 1557.22, 1402.95, 1028.04.

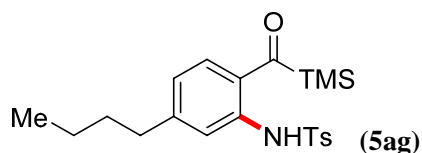

**N-(5-butyl-2-((trimethylsilyl)carbonyl)phenyl)-4-methylbenzenesulfonamide**

Following the general experiment procedure, **5ag** was obtained as a yellow liquid (62%, 25 mg).

**<sup>1</sup>H NMR** (500 MHz, CDCl<sub>3</sub>): δ = 11.63 (s, 1H), 7.71-7.67 (m, 3H), 7.46 (d, *J* = 1.0 Hz, 1H), 7.20 (d, *J* = 8.0 Hz, 2H), 6.91 (dd, *J* = 8.0, 1.5 Hz, 1H), 2.59 (t, *J* = 7.5 Hz, 2H), 2.35 (s, 3H), 1.58-1.52 (m, 2H), 1.30-1.26 (m, 4H), 0.91 (t, *J* = 7.5 Hz, 3H), 0.30 (s, 9H). **<sup>13</sup>C NMR** (125 MHz, CDCl<sub>3</sub>): δ = 240.14, 151.66, 145.02, 139.20, 138.13, 135.42, 130.85, 128.73, 126.60, 124.19, 120.53, 37.32, 34.18, 23.54, 22.85, 15.26, 2.40. **HR-MS** (ESI): *m/z* calculated for C<sub>21</sub>H<sub>29</sub>NO<sub>3</sub>SSi: [M+H]<sup>+</sup>: 404.1710, found: 404.1713. **FTIR** (KBr, cm<sup>-1</sup>): 3850.83, 3673.41, 3606.00, 3444.07, 1684.11, 1557.15, 1402.95, 1171.03, 1028.04.

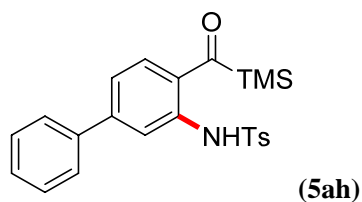

**4-methyl-N-(4-((trimethylsilyl)carbonyl)-[1,1'-biphenyl]-3-yl)benzenesulfonamide**

Following the general experiment procedure, **5ah** was obtained as a yellow liquid (60%, 25 mg).

**<sup>1</sup>H NMR** (500 MHz, CDCl<sub>3</sub>): δ = 11.65 (s, 1H), 7.91 (d, *J* = 1.5 Hz, 1H), 7.85 (d, *J* = 8.0 Hz, 1H), 7.74 (d, *J* = 8.0 Hz, 2H), 7.58-7.56 (m, 2H), 7.48-7.41 (m, 3H), 7.34 (dd, *J* = 8.0, 1.5 Hz, 1H), 7.21 (d, *J* = 8.0 Hz, 2H), 2.35 (s, 3H), 0.33 (s, 9H). **<sup>13</sup>C NMR** (125 MHz, CDCl<sub>3</sub>): δ = 240.56, 148.01, 145.20, 140.58, 139.61, 138.21, 135.78, 131.00, 130.43, 130.16, 128.73, 128.69, 127.17, 122.53, 119.24, 22.89, 2.42. **HR-MS** (ESI): *m/z* calculated for C<sub>23</sub>H<sub>25</sub>NO<sub>3</sub>SSi: [M+H]<sup>+</sup>: 424.1397, found: 424.1395. **FTIR** (KBr, cm<sup>-1</sup>): 3626.65, 3585.10, 1737.38, 1684.11, 1651.44, 1504.91, 1402.95, 1028.04.

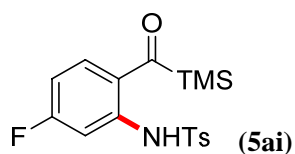

#### **N-(5-fluoro-2-((trimethylsilyl)carbonyl)phenyl)-4-methylbenzenesulfonamide**

Following the general experiment procedure, **5ai** was obtained as a yellow liquid (64%, 24 mg).

**<sup>1</sup>H NMR** (500 MHz, CDCl<sub>3</sub>): δ = 11.96 (s, 1H), 7.82 (dd, *J* = 8.5, 6.0 Hz, 1H), 7.76 (d, *J* = 8.0 Hz, 2H), 7.37 (dd, *J* = 11.0, 2.0 Hz, 1H), 7.26 (d, *J* = 8.5 Hz, 2H), 6.77 (ddd, *J* = 8.5, 8.0, 2.5 Hz, 1H), 2.38 (s, 3H), 0.33 (s, 9H). **<sup>13</sup>C NMR** (125 MHz, CDCl<sub>3</sub>): δ = 239.44, 167.89, 165.85, 145.57, 142.25 (d, *J*<sub>C-F</sub> = 12.5 Hz), 137.95, 131.19, 128.72, 124.93 (d, *J*<sub>C-F</sub> = 2.5 Hz), 110.97 (d, *J*<sub>C-F</sub> = 22.4 Hz), 107.34 (d, *J*<sub>C-F</sub> = 26.8 Hz), 22.96, 2.45. **HR-MS** (ESI): *m/z* calculated for C<sub>17</sub>H<sub>20</sub>FNO<sub>3</sub>SSi: [M+H]<sup>+</sup>: 366.0990, found: 366.0992. **FTIR** (KBr, cm<sup>-1</sup>): 3867.95, 3731.10, 3686.54, 2358.07, 1682.41, 1557.32, 1402.90, 1025.85.

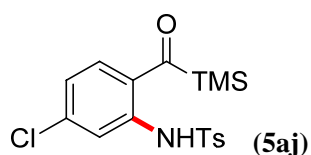

#### **(2-amino-4-chlorophenyl)(trimethylsilyl)methanone**

Following the general experiment procedure, **5aj** was obtained as a yellow liquid (73%, 28 mg).

**<sup>1</sup>H NMR** (500 MHz, CDCl<sub>3</sub>): δ = 11.71 (s, 1H), 7.73 (t, *J* = 8.0 Hz, 3H), 7.68 (d, *J* = 2.0 Hz, 1H), 7.25 (d, *J* = 8.0 Hz, 2H), 7.07 (dd, *J* = 8.5, 2.0 Hz, 1H), 2.38 (s, 3H), 0.31 (s, 9H). **<sup>13</sup>C NMR** (125

MHz, CDCl<sub>3</sub>):  $\delta$  = 240.36, 145.64, 141.92, 140.49, 137.89, 136.47, 131.24, 128.75, 126.44, 124.16, 120.50, 23.02, 2.52. HR-MS (ESI):  $m/z$  calculated for C<sub>17</sub>H<sub>20</sub>ClNO<sub>3</sub>SSi: [M+H]<sup>+</sup>: 382.0694, found: 382.0690. FTIR (KBr, cm<sup>-1</sup>): 3813.78, 3673.59, 3417.25, 2957.01, 1651.54, 1557.26, 1402.91, 1022.43.

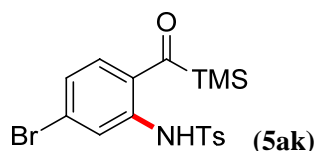

#### N-(5-bromo-2-((trimethylsilyl)carbonyl)phenyl)-4-methylbenzenesulfonamide

Following the general experiment procedure, **5ak** was obtained as a yellow liquid (65%, 28 mg).

<sup>1</sup>H NMR (500 MHz, CDCl<sub>3</sub>):  $\delta$  = 11.64 (s, 1H), 7.85 (d,  $J$  = 2.0 Hz, 1H), 7.73 (d,  $J$  = 8.5 Hz, 2H), 7.63 (d,  $J$  = 8.5 Hz, 1H), 7.24 (td,  $J$  = 8.0, 1.5 Hz, 3H), 2.38 (s, 3H), 0.31 (s, 9H). <sup>13</sup>C NMR (125 MHz, CDCl<sub>3</sub>):  $\delta$  = 240.60, 145.63, 140.32, 137.93, 136.41, 131.24, 130.62, 128.78, 127.15, 126.79, 123.60, 23.03, 2.52. HR-MS (ESI):  $m/z$  calculated for C<sub>17</sub>H<sub>20</sub>BrNO<sub>3</sub>SSi: [M+H]<sup>+</sup>: 426.0189, found: 426.0185. FTIR (KBr, cm<sup>-1</sup>): 3852.36, 3627.65, 2358.90, 1682.44, 1651.59, 1505.11, 1455.34, 1393.47.

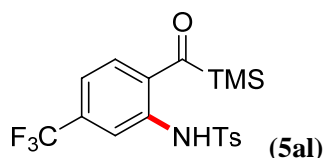

#### 4-methyl-N-(5-(trifluoromethyl)-2-((trimethylsilyl)carbonyl)phenyl)benzenesulfonamide

Following the general experiment procedure, **5ai** was obtained as a yellow liquid (72%, 29 mg).

<sup>1</sup>H NMR (500 MHz, CDCl<sub>3</sub>):  $\delta$  = 11.50 (s, 1H), 7.96 (d,  $J$  = 1.0 Hz, 1H), 7.92 (d,  $J$  = 8.0 Hz, 1H), 7.73 (d,  $J$  = 8.0 Hz, 2H), 7.36 (dd,  $J$  = 8.5, 1.5 Hz, 1H), 7.24 (d,  $J$  = 8.0 Hz, 2H), 2.37 (s, 3H), 0.33 (s, 9H). <sup>13</sup>C NMR (125 MHz, CDCl<sub>3</sub>):  $\delta$  = 241.80, 145.89, 139.63, 137.84, 136.61 (q,  $J_{C-F}$  = 32.9 Hz), 135.72, 131.36, 128.92, 124.60 (q,  $J_{C-F}$  = 271.4 Hz), 120.52 (q,  $J_{C-F}$  = 3.7 Hz), 117.99 (q,  $J_{C-F}$  = 3.9 Hz), 23.10, 2.61. HR-MS (ESI):  $m/z$  calculated for C<sub>18</sub>H<sub>20</sub>F<sub>3</sub>NO<sub>3</sub>SSi: [M+H]<sup>+</sup>: 416.0958, found: 416.0955. FTIR (KBr, cm<sup>-1</sup>): 3851.56, 3654.62, 3555.22, 3384.07, 1682.56, 1402.94, 1025.23, 814.95, 667.84.

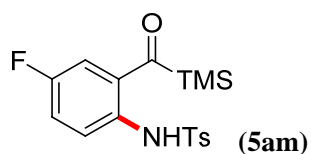

**N-(4-fluoro-2-((trimethylsilyl)carbonyl)phenyl)-4-methylbenzenesulfonamide**

Following the general experiment procedure, **5am** was obtained as a yellow liquid (75%, 27 mg).

**<sup>1</sup>H NMR** (500 MHz, CDCl<sub>3</sub>): δ = 10.11 (s, 1H), 7.67 (d, *J* = 8.0 Hz, 2H), 7.55-7.52 (m, 1H), 7.26-7.22 (m, 4H), 2.39 (s, 3H), 0.27 (s, 9H). **<sup>13</sup>C NMR** (125 MHz, CDCl<sub>3</sub>): δ = 241.04, 158.05 (d, *J*<sub>C-F</sub> = 252.9 Hz), 145.24, 138.76 (d, *J*<sub>C-F</sub> = 1.8 Hz), 135.26, 130.97, 129.48 (d, *J*<sub>C-F</sub> = 3.2 Hz), 129.04 (d, *J*<sub>C-F</sub> = 0.88 Hz), 127.25 (d, *J*<sub>C-F</sub> = 7.6 Hz), 126.27 (d, *J*<sub>C-F</sub> = 12.1 Hz), 122.58 (d, *J*<sub>C-F</sub> = 20.9 Hz), 23.20, 2.70. **HR-MS** (ESI): *m/z* calculated for C<sub>17</sub>H<sub>20</sub>FNO<sub>3</sub>SSi: [M+H]<sup>+</sup>: 366.0990, found: 366.0993. **FTIR** (KBr, cm<sup>-1</sup>): 3853.37, 3675.46, 3422.43, 2360.84, 1560.75, 1454.21, 1397.85, 1025.23.

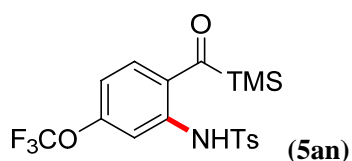

**4-methyl-N-(5-(trifluoromethoxy)-2-((trimethylsilyl)carbonyl)phenyl)benzenesulfonamide**

Following the general experiment procedure, **5an** was obtained as a yellow liquid (62%, 27 mg).

**<sup>1</sup>H NMR** (500 MHz, CDCl<sub>3</sub>): δ = 11.81 (s, 1H), 7.84 (d, *J* = 8.5 Hz, 1H), 7.76-7.74 (m, 2H), 7.53 (d, *J* = 1.5 Hz, 1H), 7.25 (d, *J* = 8.0 Hz, 2H), 6.92-6.89 (m, 1H), 2.37 (s, 3H), 0.33 (s, 9H). **<sup>13</sup>C NMR** (125 MHz, CDCl<sub>3</sub>): δ = 240.08, 154.14 (d, *J*<sub>C-F</sub> = 1.5 Hz), 145.74, 141.55, 137.78, 137.32, 131.23, 128.84, 125.99, 121.67 (q, *J*<sub>C-F</sub> = 258.3 Hz), 114.79, 111.68, 23.01, 2.51. **HR-MS** (ESI): *m/z* calculated for C<sub>18</sub>H<sub>20</sub>F<sub>3</sub>NO<sub>4</sub>SSi: [M+H]<sup>+</sup>: 432.0907, found: 432.0903. **FTIR** (KBr, cm<sup>-1</sup>): 3851.17, 3585.34, 3195.50, 1651.55, 1557.26, 1455.23, 1402.95, 1032.09.

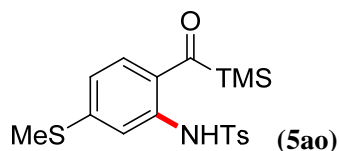

**4-methyl-N-(5-(methylthio)-2-((trimethylsilyl)carbonyl)phenyl)benzenesulfonamide**

Following the general experiment procedure, **5ao** was obtained as a yellow liquid (36%, 14 mg).



**<sup>1</sup>H NMR** (500 MHz, CDCl<sub>3</sub>): δ = 11.86 (s, 1H), 7.73 (d, *J* = 8.5 Hz, 2H), 7.65 (d, *J* = 8.5 Hz, 1H), 7.42 (d, *J* = 1.5 Hz, 1H), 7.23 (d, *J* = 8.5 Hz, 2H), 6.89 (dd, *J* = 8.5, 2.0 Hz, 1H), 2.47 (s, 3H), 2.37 (s, 3H), 0.30 (s, 9H). **<sup>13</sup>C NMR** (125 MHz, CDCl<sub>3</sub>): δ = 239.06, 149.46, 145.26, 139.78, 138.10, 135.29, 131.00, 128.70, 124.86, 120.28, 115.32, 22.90, 15.91, 2.40. **HR-MS** (ESI): *m/z* calculated for C<sub>18</sub>H<sub>23</sub>NO<sub>3</sub>S<sub>2</sub>Si: [M+H]<sup>+</sup>: 394.0961, found: 394.0954. **FTIR** (KBr, cm<sup>-1</sup>): 3731.00, 3646.31, 3417.26, 2358.30, 1651.58, 1557.32, 1455.31, 1027.42.

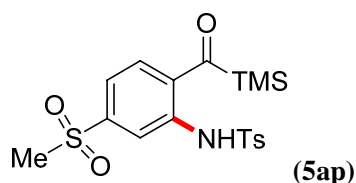

#### **4-methyl-N-(5-(methylsulfonyl)-2-((trimethylsilyl)carbonyl)phenyl)benzenesulfonamide**

Following the general experiment procedure, **5ap** was obtained as a yellow liquid (60%, 29 mg).

**<sup>1</sup>H NMR** (500 MHz, CDCl<sub>3</sub>): δ = 11.55 (s, 1H), 8.21 (d, *J* = 2.0 Hz, 1H), 8.00 (d, *J* = 8.0 Hz, 1H), 7.78 (d, *J* = 8.5 Hz, 2H), 7.66 (dd, *J* = 8.0, 1.5 Hz, 1H), 7.28-7.26 (m, 2H), 3.07 (s, 3H), 2.37 (s, 3H), 0.35 (s, 9H). **<sup>13</sup>C NMR** (125 MHz, CDCl<sub>3</sub>): δ = 242.02, 146.26, 140.02, 137.51, 136.19, 131.50, 129.96, 129.07, 128.03, 121.84, 119.32, 45.59, 23.14, 2.60. **HR-MS** (ESI): *m/z* calculated for C<sub>18</sub>H<sub>23</sub>NO<sub>5</sub>S<sub>2</sub>Si: [M+H]<sup>+</sup>: 426.0860, found: 426.0857. **FTIR** (KBr, cm<sup>-1</sup>): 3718.51, 3686.30, 3585.10, 1682.36, 1651.50, 1455.23, 1402.97, 1030.84.

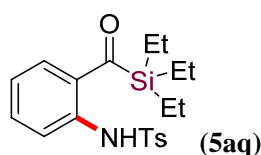

#### **4-methyl-N-(2-((triethylsilyl)carbonyl)phenyl)benzenesulfonamide**

Following the general experiment procedure, **5aq** was obtained as a yellow liquid (60%, 23.5 mg).

**<sup>1</sup>H NMR** (500 MHz, CDCl<sub>3</sub>): δ = 11.58 (s, 1H), 7.78 (dd, *J* = 8.0, 1.5 Hz, 1H), 7.68 (dd, *J* = 8.0, 1.5 Hz, 3H), 7.43-7.40 (m, 1H), 7.18 (d, *J* = 8.0 Hz, 2H), 7.13 (td, *J* = 7.5, 1.0 Hz, 1H), 2.33 (s, 3H), 0.93-0.90 (m, 9H), 0.85-0.80 (m, 6H). **<sup>13</sup>C NMR** (125 MHz, CDCl<sub>3</sub>): δ = 239.25, 142.70, 136.25, 135.70, 133.03, 132.61, 128.53, 127.03, 126.15, 121.75, 118.57, 20.44, 6.31, 2.87.

**HR-MS** (ESI):  $m/z$  calculated for  $C_{20}H_{27}NO_3SSi$ :  $[M+H]^+$ : 390.1554, found: 390.1553. **FTIR** (KBr,  $cm^{-1}$ ): 3384.70, 2945.79, 2828.04, 1647.66, 1403.74, 1028.83.

## Deuterium-Labeled Experiments

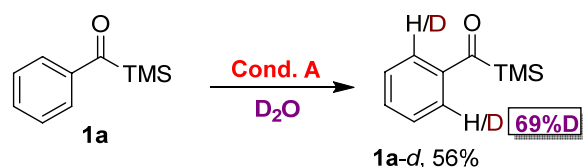

An oven-dried vial was charged with  $[Ru(p\text{-cymene})Cl_2]_2$  (5 mol %, 0.005 mmol, 3.1 mg),  $AgNTf_2$  (20 mol %, 0.02 mmol, 15.6 mg),  $Ag_2O$  (50 mol %, 0.05 mmol, 23.2 mg), **1a** (0.1 mmol, 17.8 mg) and DCM (0.7 mL). Then,  $D_2O$  (10.0 eq, 1.0 mmol, 20.3 mg) was added into the solution. The vial was sealed under argon and heated to 90 °C with stirring for 6 hours. After cooling down, the mixture was directly applied to a flash column chromatography (ethyl acetate/petroleum ether mixtures), providing deuterium labeled **1a-d** as a yellow oil (10 mg, 56% recovered). The D% was estimated by  $^1H$  NMR.

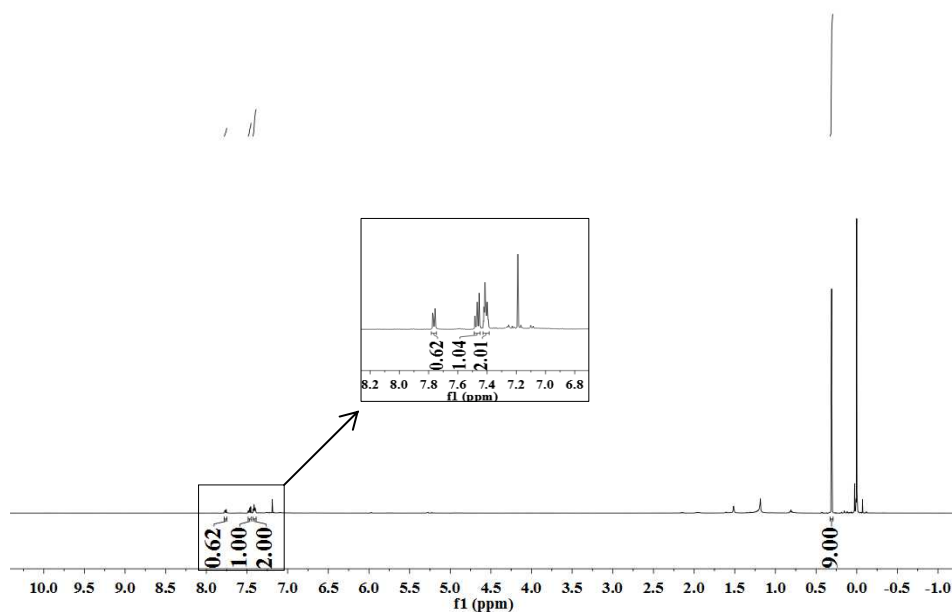

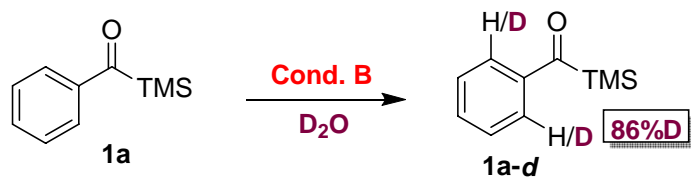

An oven-dried vial was charged with [Ru(*p*-cymene)Cl<sub>2</sub>]<sub>2</sub> (5 mol %, 0.005 mmol, 3.1 mg), AgSbF<sub>6</sub> (40 mol %, 0.04 mmol, 13.6 mg), Cu(OAc)<sub>2</sub>•H<sub>2</sub>O (1.0 eq, 0.1 mmol, 20.0 mg), NaOAc (40 mol %, 0.04 mmol, 3.3 mg), **1a** (0.1 mmol, 17.8 mg) and DCM (0.7 mL). Then, D<sub>2</sub>O (10.0 eq, 1.0 mmol, 20.3 mg) was added into the solution. The vial was sealed under argon and heated to 90 °C with stirring for 6 hours. After cooling down, the mixture was directly applied to a flash column chromatography (ethyl acetate/petroleum ether mixtures), providing deuterium labeled **1a-d** as a yellow oil (12 mg, 68% recovered). The D% of **1a-d** was estimated by <sup>1</sup>H NMR.

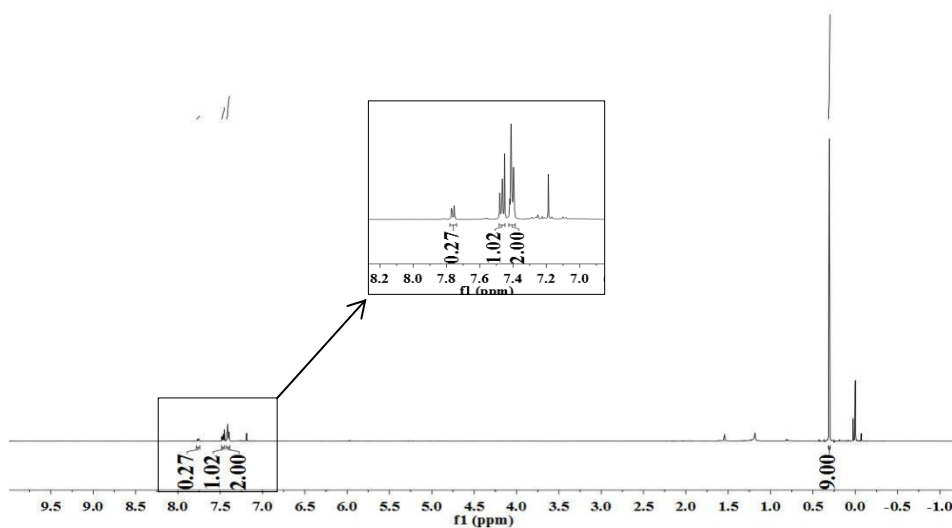

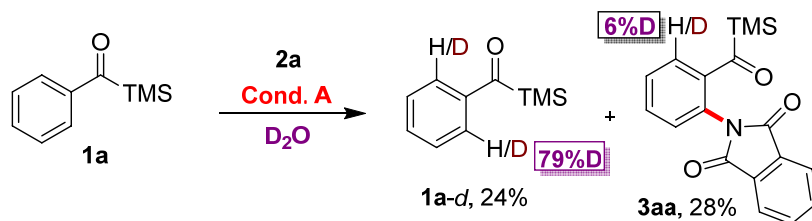

An oven-dried vial was charged with  $[Ru(p\text{-cymene})Cl_2]_2$  (5 mol %, 0.005 mmol, 3.1 mg),  $AgNTf_2$  (20 mol %, 0.02 mmol, 15.6 mg),  $Ag_2O$  (50 mol %, 0.05 mmol, 23.2 mg), **1a** (0.1 mmol, 17.8 mg), **2a** (0.2 mmol, 63.4 mg) and DCM (0.7 mL). Then,  $D_2O$  (10.0 eq, 1.0 mmol, 20.3 mg) was added into the solution. The vial was sealed under argon and heated to 90 °C with stirring for 12 hours. After cooling down, the mixture was directly applied to a flash column chromatography (ethyl acetate/petroleum ether mixtures) on silica gel to afford **3aa** (9.0 mg, 28% yield) and **1a-d** (4.3 mg, 24% recovered). The D% of **1a-d** and **3aa** were estimated by  $^1H$  NMR.

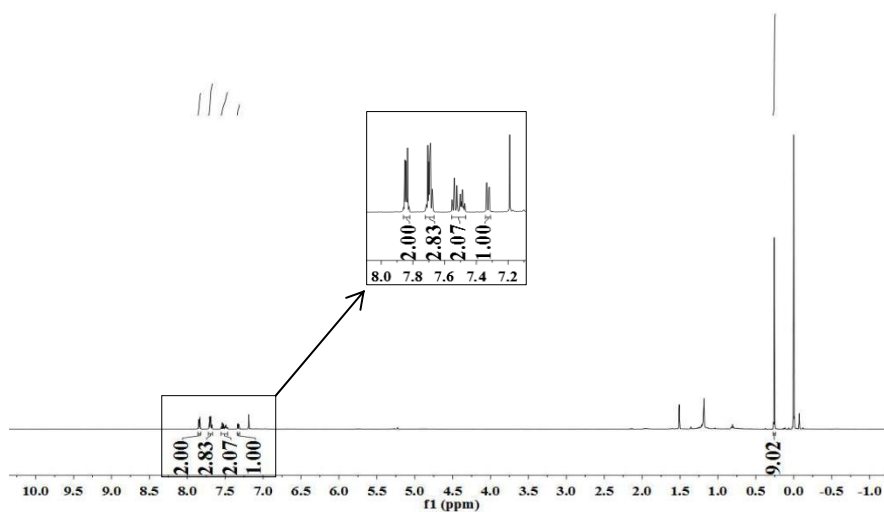

**3aa**

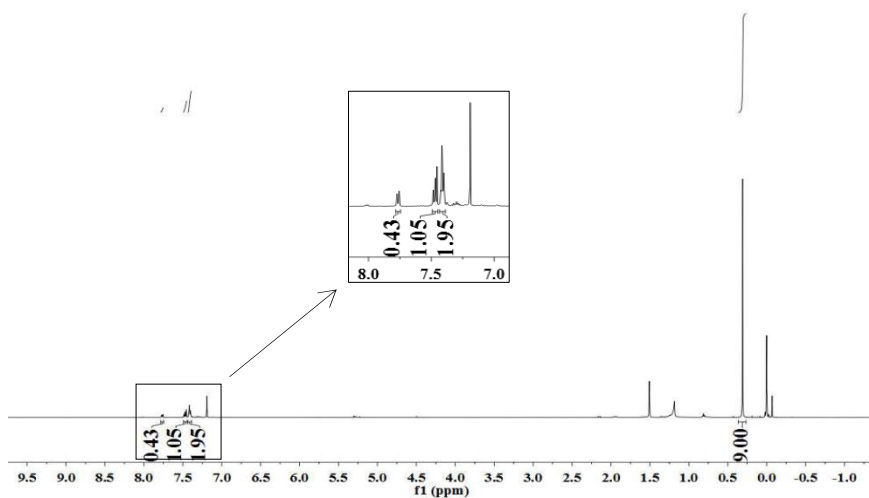

**1a-d**

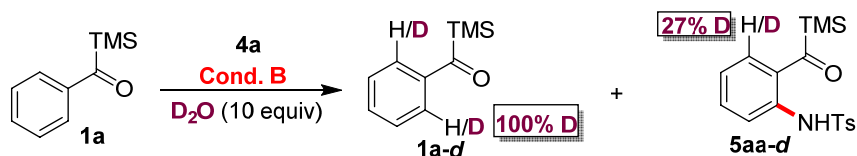

An oven-dried vial was charged with  $[\text{Ru}(p\text{-cymene})\text{Cl}_2]_2$  (5 mol %, 0.005 mmol, 3.1 mg),  $\text{AgSbF}_6$  (40 mol %, 0.04 mmol, 13.6 mg),  $\text{Cu}(\text{OAc})_2 \cdot \text{H}_2\text{O}$  (1.0 eq, 0.1 mmol, 20.0 mg),  $\text{NaOAc}$  (40 mol %, 0.04 mmol, 3.3 mg), **1a** (0.1 mmol, 17.8 mg), **4a** (0.2 mmol, 39.4 mg) and DCM (0.7 mL). Then,  $\text{D}_2\text{O}$  (10.0 eq, 1.0 mmol, 20.3 mg) was added into the solution. The vial was sealed under argon and heated to 90 °C with stirring for 12 hours. After cooling down, the mixture was directly applied to a flash column chromatography (ethyl acetate/petroleum ether mixtures) on silica gel to afford **5aa-d** (11.6 mg, 33% yield) and **1a-d** (7.3 mg, 41% recovered). The D% of **1a-d** and **5aa-d** were estimated by  $^1\text{H}$  NMR.

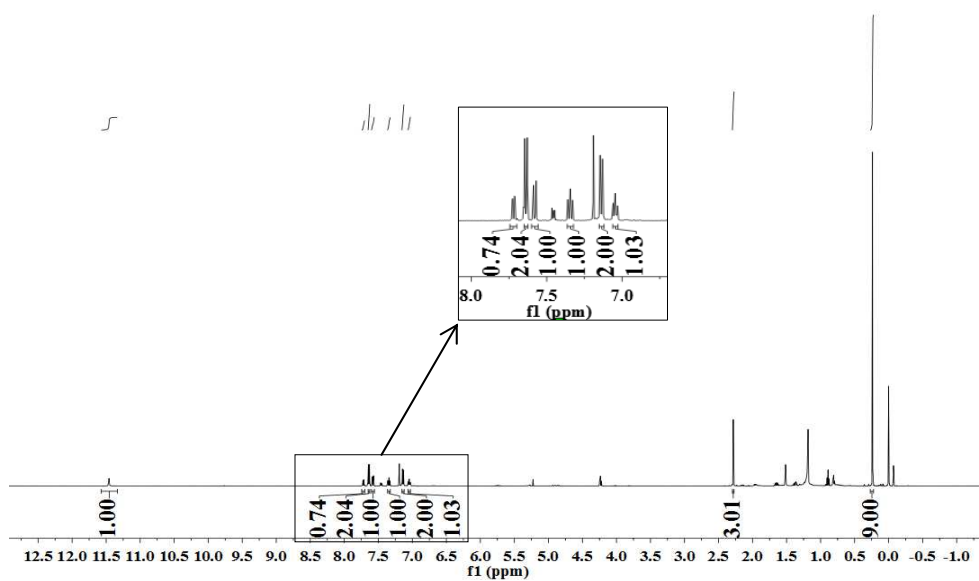

**5aa-d**

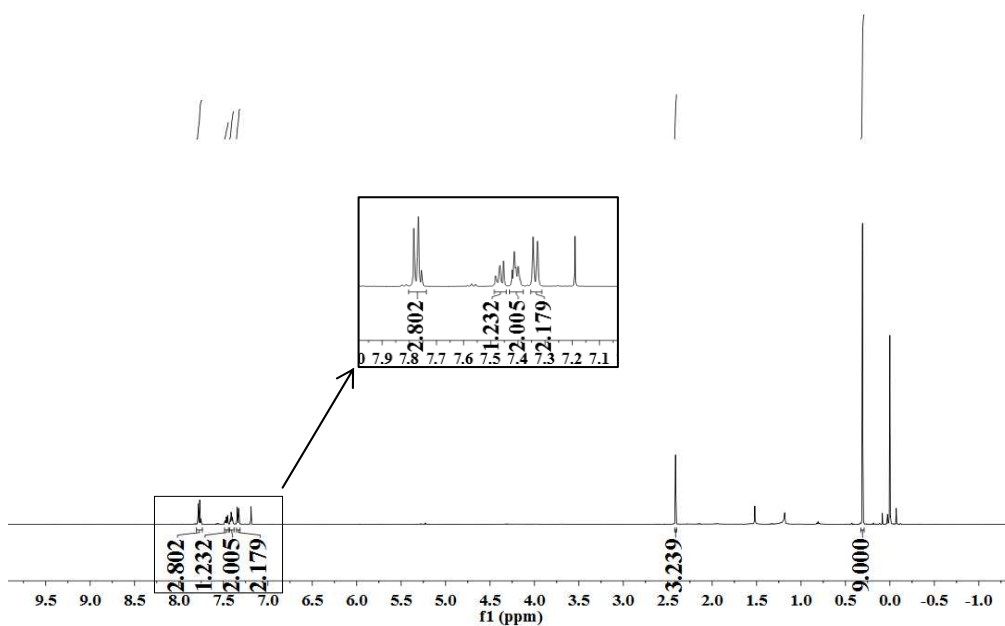

**1a-d**

## Deuterium Experiments

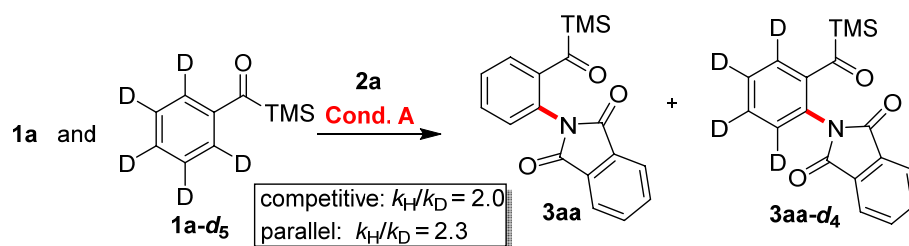

## Competitive KIE Experiments

An oven-dried vial was charged with  $[\text{Ru}(p\text{-cymene})\text{Cl}_2]_2$  (5 mol %, 0.005 mmol, 3.1 mg),  $\text{AgNTf}_2$  (20 mol %, 0.02 mmol, 15.6 mg),  $\text{Ag}_2\text{O}$  (50 mol %, 0.05 mmol, 23.2 mg), **2a** (0.3 mmol, 95.2 mg) and DCM (0.7 mL). Then, **1a** (0.1 mmol, 17.8 mg) and **1a-d<sub>5</sub>** (0.1 mmol, 18.3 mg) were added into the solution. The vial was sealed under argon and heated to 90 °C with stirring for 30 min. After cooling down, the mixture was directly applied to column chromatography for separation. The ratio of **3aa/3aa-d<sub>4</sub>** (17.5 mg, 27% yield) was determined by  $^1\text{H}$  NMR to be 2.0.

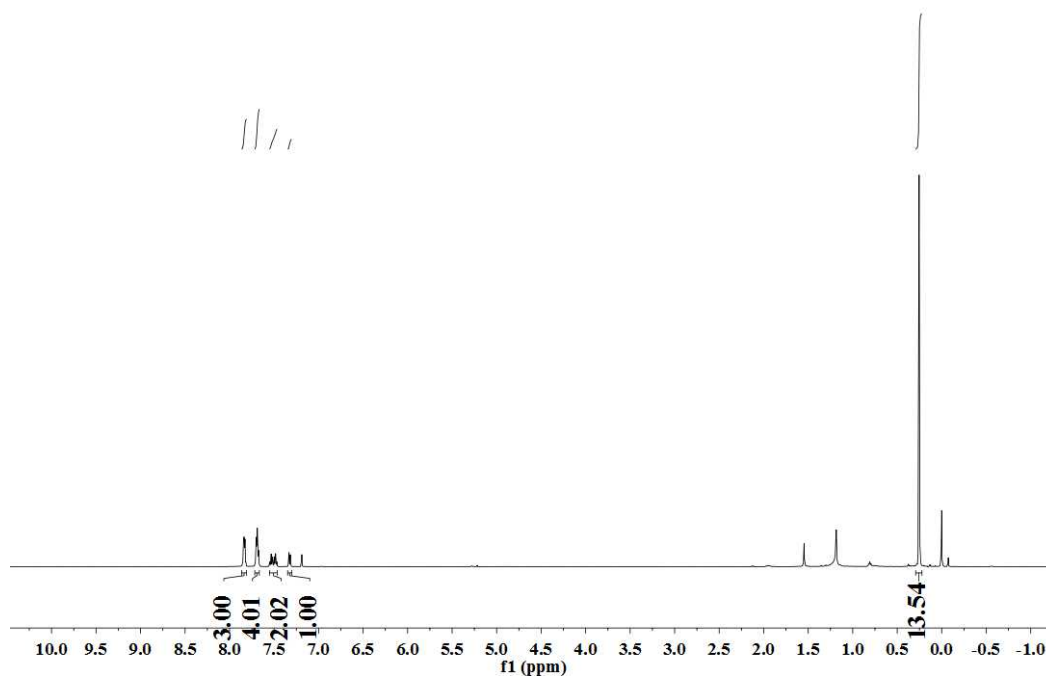

## Parallel KIE Experiments

Parallel independent reactions of **1a** or **1a-d<sub>5</sub>** with **2a** were performed to determine the corresponding KIE value. Each 10 mL vial was charged with [Ru(*p*-cymene)Cl<sub>2</sub>]<sub>2</sub> (5 mol %, 0.005 mmol, 3.1 mg), AgNTf<sub>2</sub> (20 mol %, 0.02 mmol, 15.6 mg), Ag<sub>2</sub>O (50 mol %, 0.05 mmol, 23.2 mg), **2a** (0.2 mmol, 63.4 mg) and DCM (0.7 mL). Then, **1a** (0.1 mmol, 17.8 mg) and **1a-d<sub>5</sub>** (0.1 mmol, 18.3 mg) were added into the solution in sequence. The vials were sealed under Ar and heated to 90°C with stirring for 2, 4, 6, 8 or 10 minutes. After cooling down, the mixture was concentrated in vacuo and purified by column chromatography to determine the product yields. A KIE value was determined to be 2.30.

| yield \                 | 2    | 4     | 6    | 8     | 10    |
|-------------------------|------|-------|------|-------|-------|
| <b>ba</b>               | 3.4% | 10.6% | 20%  | 28.7% | 36.4% |
| <b>ba-d<sub>2</sub></b> | 0 %  | 3.9%  | 7.6% | 11.1% | 14.7% |

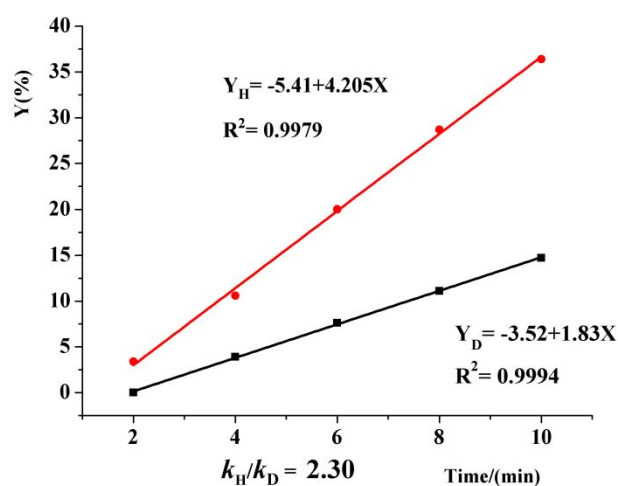



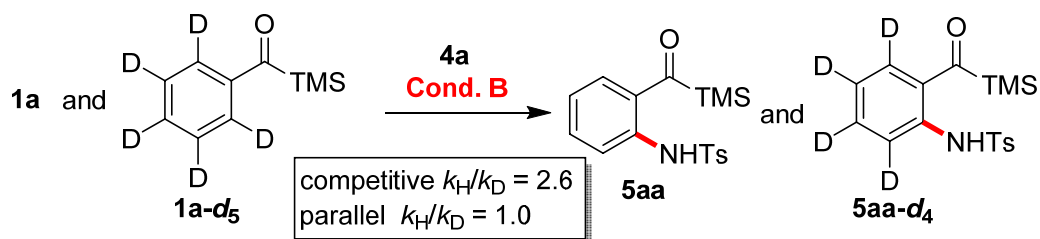

### Competitive KIE Experiments

An oven-dried vial was charged with  $[\text{Ru}(p\text{-cymene})\text{Cl}_2]_2$  (5 mol %, 0.005 mmol, 3.1 mg),  $\text{AgSbF}_6$  (40 mol %, 0.04 mmol, 13.6 mg),  $\text{Cu}(\text{OAc})_2 \cdot \text{H}_2\text{O}$  (1.0 eq, 0.1 mmol, 20.0 mg),  $\text{NaOAc}$  (40 mol %, 0.04 mmol, 3.3 mg) and  $\text{DCM}$  (0.7 mL). Then,  $\mathbf{1a}$  (0.1 mmol, 17.8 mg),  $\mathbf{1a-d_5}$  (0.1 mmol, 18.3 mg) and  $\mathbf{4a}$  (0.4 mmol, 79.0 mg) were added into the solution. The vial was sealed under argon and heated to  $90^\circ\text{C}$  with stirring for 30 min. After cooling down, the mixture was directly applied to column chromatography for separation. The ratio of  $\mathbf{5aa}/\mathbf{5aa-d_4}$  (34.5 mg, 50% yield) was determined by  $^1\text{H}$  NMR to be 2.6.

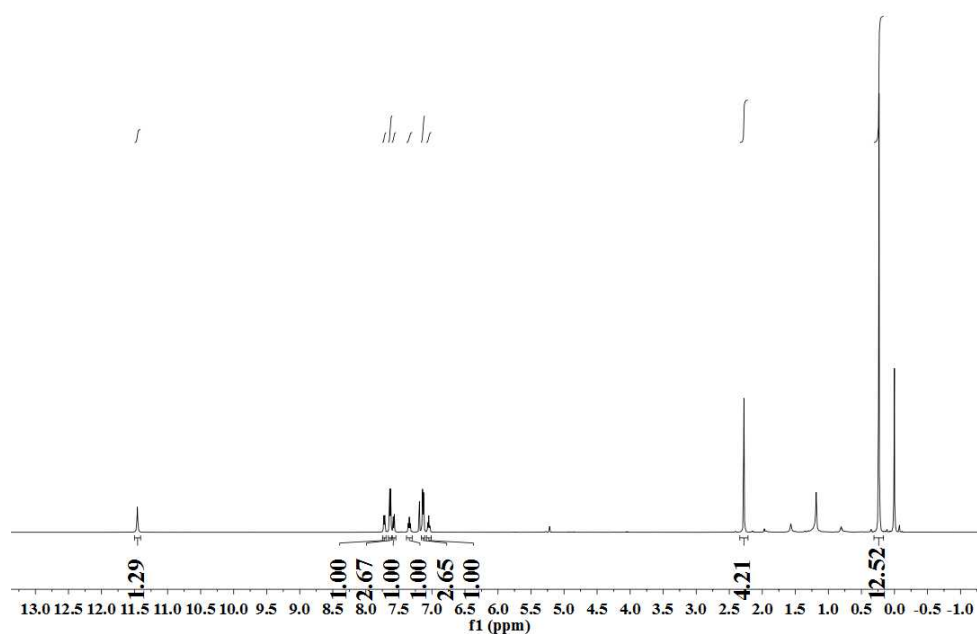

## Parallel KIE Experiments

Parallel independent reactions of **1a** or **1a-d<sub>5</sub>** with **4a** were performed to determine the corresponding KIE value. Each 10 mL vial was charged with [Ru(*p*-cymene)Cl<sub>2</sub>]<sub>2</sub> (5 mol %, 0.005 mmol, 3.1 mg), AgSbF<sub>6</sub> (40 mol %, 0.04 mmol, 13.6 mg), Cu(OAc)<sub>2</sub>•H<sub>2</sub>O (1.0 eq, 0.1 mmol, 20.0 mg), NaOAc (40 mol %, 0.04 mmol, 3.3 mg) and DCM (0.7 mL). Then, **1a** (0.1 mmol, 17.8 mg), **1a-d<sub>5</sub>** (0.1 mmol, 18.3 mg) and **4a** (0.2 mmol, 39.4 mg) were added into the solution. The vials were sealed under Ar and heated to 90°C with stirring for 1.5, 2, 2.5 or 3.0 minutes. After cooling down, the mixture was concentrated in vacuo and purified by column chromatography to determine the product yields. A KIE value was determined to be 1.0.

| yield \                 | 1.5    | 2     | 2.5   | 3     |
|-------------------------|--------|-------|-------|-------|
| <b>ba</b>               | 16%    | 21%   | 31.5% | 37%   |
| <b>ba-d<sub>2</sub></b> | 10.3 % | 15.3% | 22.6% | 31.7% |

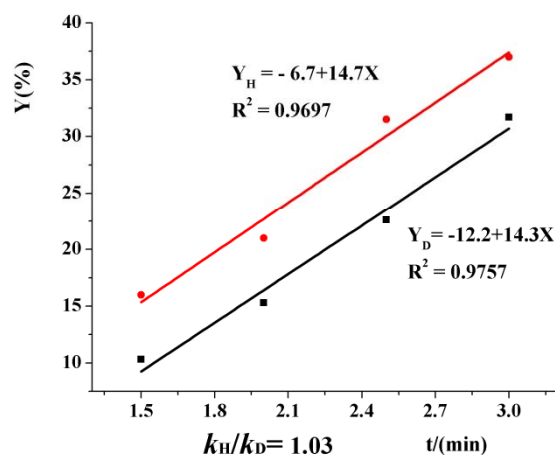

## Competitive Reaction

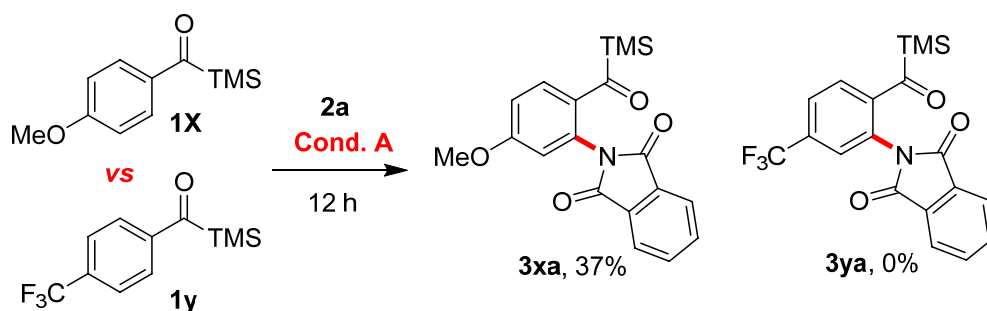

An oven-dried vial was charged with  $[\text{Ru}(p\text{-cymene})\text{Cl}_2]_2$  (5 mol%, 0.005 mmol, 3.1 mg),  $\text{AgNTf}_2$  (20 mol%, 0.02 mmol, 15.6 mg),  $\text{Ag}_2\text{O}$  (50 mol%, 0.05 mmol, 23.2 mg), **2a** (0.2 mmol, 63.4 mg) and DCM (0.7 mL). Then, **1x** (0.1 mmol, 20.8 mg) and **1y** (0.1 mmol, 23.4 mg) were added into the solution. The vial was sealed under argon and heated to 90 °C with stirring for 12 hours. After cooling down, the mixture was concentrated in vacuo and purified by column chromatography to afford the product **3xa** (26 mg, 37%).

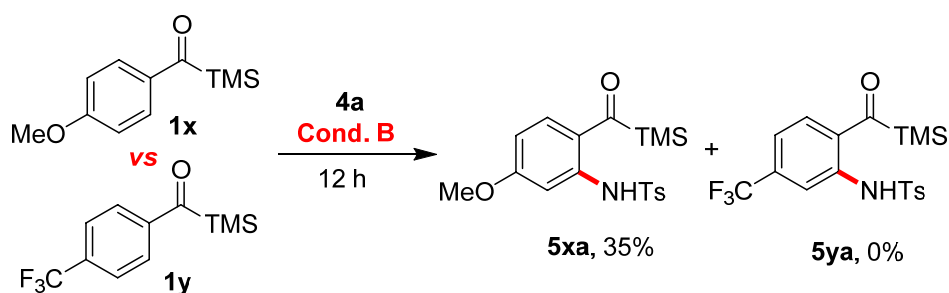

An oven-dried vial was charged with  $[\text{Ru}(p\text{-cymene})\text{Cl}_2]_2$  (5 mol %, 0.005 mmol, 3.1 mg),  $\text{AgSbF}_6$  (40 mol %, 0.04 mmol, 13.6 mg),  $\text{Cu}(\text{OAc})_2 \cdot \text{H}_2\text{O}$  (1.0 eq, 0.1 mmol, 20.0 mg),  $\text{NaOAc}$  (40 mol%, 0.04 mmol, 3.3 mg) and DCM (0.7 mL). Then, **1x** (0.1 mmol, 17.8 mg), **1y** (0.2 mmol, 39.4 mg) and **4a** was added into the solution. The vial was sealed under argon and heated to 90 °C with stirring for 12 hours. After cooling down, the mixture was concentrated in vacuo and purified by column chromatography to afford the product **5ax** (27 mg, 35%).

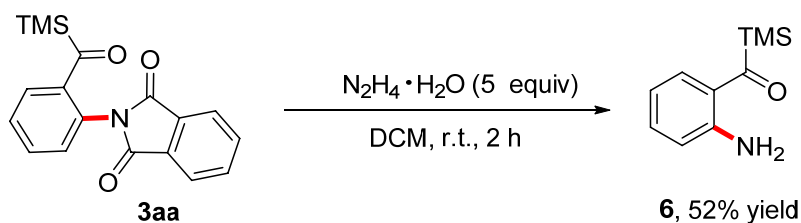

A suspension of **3aa** (32.3 mg, 0.1 mmol) and hydrazine (5.0 eq), was stirred at ambient temperature for 4 h. At ambient temperature, the reaction mixture was diluted with  $\text{CH}_2\text{Cl}_2$  and passed through celite with  $\text{CH}_2\text{Cl}_2$ . The organic layer was dried over  $\text{Na}_2\text{SO}_4$ . After evaporation of the solvent in vacuo, the crude product was purified by column chromatography on silica gel to yield **6** (10.0 mg, 52 %) as a yellow solid.  **$^1\text{H NMR}$**  (500 MHz,  $\text{CDCl}_3$ ):  $\delta$  = 7.06 (td,  $J$  = 8.0, 1.5 Hz, 1H), 6.77 (dd,  $J$  = 7.5, 1.5 Hz, 1H), 6.71 (t,  $J$  = 7.4 Hz, 1H), 6.65 (d,  $J$  = 8.0 Hz, 1H), 5.68 (s, 2H), 0.08 (s, 9H).  **$^{13}\text{C NMR}$**  (125 MHz,  $\text{CDCl}_3$ ):  $\delta$  = 160.80, 144.61, 130.93, 129.73, 123.10, 120.45, 117.57, 2.93. **HR-MS** (ESI):  $m/z$  calculated for  $\text{C}_{10}\text{H}_{15}\text{NOSi}$ :  $[\text{M}+\text{H}]^+$ : 194.0996, found: 194.0994. **FTIR** (KBr,  $\text{cm}^{-1}$ ): 3851.10, 3646.24, 1651.56, 1557.20, 1504.96, 1404.83.

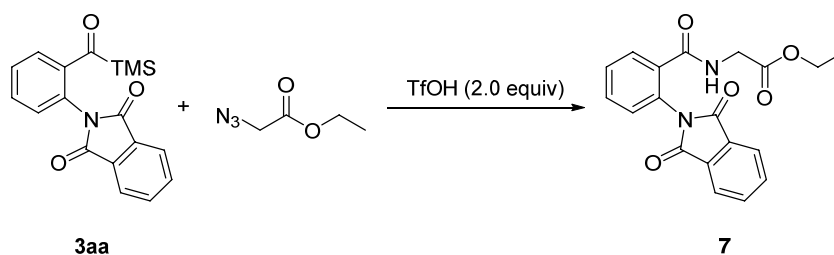

To a stirred mixture of **3aa** (0.2 mmol, 64.7 mg) and azide (0.36 mmol, 46.5 mg) in  $\text{CH}_2\text{Cl}_2$  (1 mL) was slowly added TfOH (2.0 equiv, 0.4 mmol). The reaction mixture was kept for 30 min at room temperature, then it was quenched with aqueous KOH (10%, 5 mL), extracted with  $\text{CH}_2\text{Cl}_2$  (15 mL\*3), washed with brine (15 mL), dried over  $\text{Mg}_2\text{SO}_4$  and concentrated. The residue was purified by flash chromatography (MeOH/DCM mixture) to give **7** as a white sticky liquid (56.3 mg, 80% yield).  **$^1\text{H NMR}$**  (500 MHz,  $\text{CDCl}_3$ ):  $\delta$  = 7.95 – 7.89 (m, 2H), 7.79 – 7.74 (m, 2H), 7.74 – 7.71 (m, 1H), 7.64 – 7.59 (m, 1H), 7.54 – 7.48 (m, 1H), 7.43 – 7.36 (m, 1H), 6.67 (t,  $J$  = 5.1 Hz, 1H), 4.16 (q,  $J$  = 7.1 Hz, 2H), 4.05 (d,  $J$  = 5.1 Hz, 2H), 1.24 (t,  $J$  = 7.1 Hz, 3H).  **$^{13}\text{C NMR}$**  (125 MHz,  $\text{CDCl}_3$ )  $\delta$  = 168.53, 166.48, 165.80, 133.26, 132.42, 131.07, 130.59, 129.03, 128.15, 127.29, 122.82, 60.53, 40.82, 13.08. **HR-MS** (ESI):  $m/z$  calculated for  $\text{C}_{19}\text{H}_{16}\text{N}_2\text{O}_5$ :  $[\text{M}+\text{H}]^+$ : 353.1132, found: 353.1130. **FTIR** (KBr,  $\text{cm}^{-1}$ ): 3415.24, 3233.65, 1714.95, 1636.92, 1616.43, 1381.31, 1196.26, 619.44.

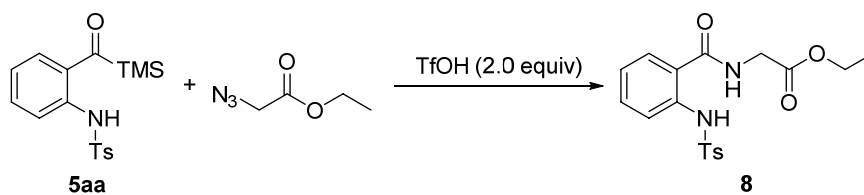

To a stirred mixture of **5aa** (0.2 mmol, 69.5 mg) and azide (0.36 mmol, 46.5 mg) in  $\text{CH}_2\text{Cl}_2$  (1 mL) was slowly added TfOH (2.0 equiv, 0.4 mmol). The reaction mixture was kept for 30 min at room temperature, then it was quenched with aqueous KOH (10%, 5 mL), extracted with  $\text{CH}_2\text{Cl}_2$  (15 mL\*3), washed with brine (15 mL), dried over  $\text{Mg}_2\text{SO}_4$  and concentrated. The residue was purified by flash chromatography (MeOH/DCM mixture) to give **8** as a light yellow solid (52.6 mg, 70% yield), m. p: 128.2 °C.  **$^1\text{H NMR}$**  (500 MHz,  $\text{CDCl}_3$ ):  $\delta$  = 10.69 (s, 1H), 7.68 – 7.63 (m, 3H), 7.45 – 7.44 (m, 1H), 7.39 – 7.35 (m, 1H), 7.18 (d,  $J$  = 8.1 Hz, 2H), 7.05 – 7.00 (m, 1H), 6.74 (t,  $J$  = 5.1 Hz, 1H), 4.25 (q,  $J$  = 7.1 Hz, 2H), 4.07 (d,  $J$  = 5.1 Hz, 2H), 2.33 (s, 3H), 1.31 (t,  $J$  = 7.1 Hz, 3H).  **$^{13}\text{C NMR}$**  (125 MHz,  $\text{CDCl}_3$ )  $\delta$  = 169.53, 168.35, 143.73, 138.88, 136.37, 132.90, 129.53, 127.25, 127.10, 123.55, 121.00, 120.61, 61.86, 41.67, 21.49, 14.16. **HR-MS** (ESI):  $m/z$  calculated for  $\text{C}_{18}\text{H}_{20}\text{N}_2\text{O}_5\text{S}$ :  $[\text{M}+\text{H}]^+$ : 377.1166, found: 377.1165. **FTIR** (KBr,  $\text{cm}^{-1}$ ): 2914.95, 1748.60, 1616.82, 1543.93, 1412.15, 1207.48, 1154.21, 1084.11.

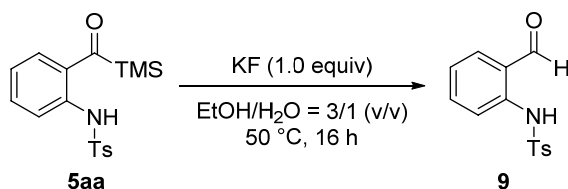

A screw-cap vial was charged with KF (1.0 equiv, 0.2 mmol), EtOH/ $\text{H}_2\text{O}$  = 3/1 (1.5 mL/ 0.5 mL). Then **5aa** (0.2 mmol, 69.5 mg) were added into the solution in sequence. The vial was sealed under argon and heated to 50 °C with stirring for 16 h. After cooling down, the mixture was directly applied to a flash column chromatography (ethyl acetate/petroleum ether mixtures) to afford **9** as a white solid (43.4 mg, 79% yield). m. p: 146.1 °C.  **$^1\text{H NMR}$**  (500 MHz,  $\text{CDCl}_3$ ):  $\delta$  = 10.80 (s, 1H), 9.90 – 9.76 (m, 1H), 7.80 – 7.74 (m, 2H), 7.68 (d,  $J$  = 8.4 Hz, 1H), 7.59 (dd,  $J$  = 7.6, 1.7 Hz, 1H), 7.50 (ddd,  $J$  = 8.7, 7.4, 1.7 Hz, 1H), 7.24 (d,  $J$  = 8.1 Hz, 2H), 7.16 (td,  $J$  = 7.5, 1.0 Hz, 1H), 2.36 (s, 3H).  **$^{13}\text{C NMR}$**  (125 MHz,  $\text{CDCl}_3$ )  $\delta$  = 195.08, 144.24, 139.89, 136.33, 136.17, 135.83, 129.78, 127.26, 123.01, 121.87, 117.71, 21.55. **HR-MS** (ESI):  $m/z$  calculated for  $\text{C}_{14}\text{H}_{13}\text{NO}_3\text{S}$ :  $[\text{M}+\text{H}]^+$ : 276.0689, found: 276.0682. **FTIR** (KBr,  $\text{cm}^{-1}$ ): 3181.31, 1614.02, 1499.07, 1406.54, 1344.86, 1159.81, 1086.92, 927.10.

## Gram-Scaled Synthesis

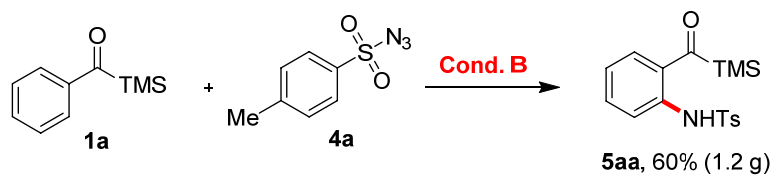

An oven-dried vial was charged with [Ru(*p*-cymene)Cl<sub>2</sub>]<sub>2</sub> (5 mol %, 170 mg), AgSbF<sub>6</sub> (40 mol %, 769 mg), Cu(OAc)<sub>2</sub>•H<sub>2</sub>O (1.0 eq, 1.14 g), NaOAc (40 mol %, 184 mg) and DCM (40 mL). Then, **1a** (1.0 eq, 1.02 g) and **4a** (2.0 eq, 2.76 g) was added into the solution. The vial was sealed under argon and heated to 90 °C with stirring for 12 hours. After cooling down, the mixture was concentrated in vacuo and purified by column chromatography to afford the product **5aa** (1.2 g, 60%).

## References:

1. H.-J. Zhang, D. L. Priebsenow, C. Bolm, *Chem. Soc. Rev.* **2013**, *42*, 8540–8571.
2. P. Becker, R. Pirwerdjan, C. Bolm, *Angew. Chem. Int. Ed.* **2015**, *54*, 15493–15496.

# NMR Spectra

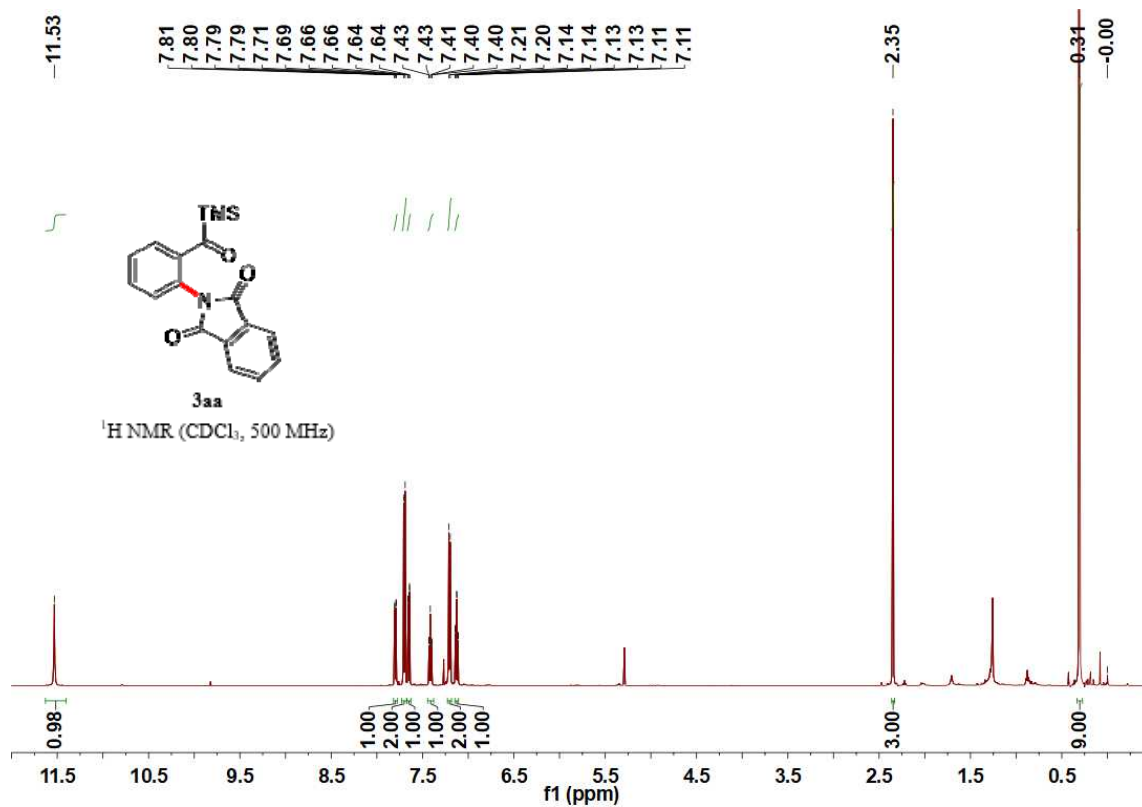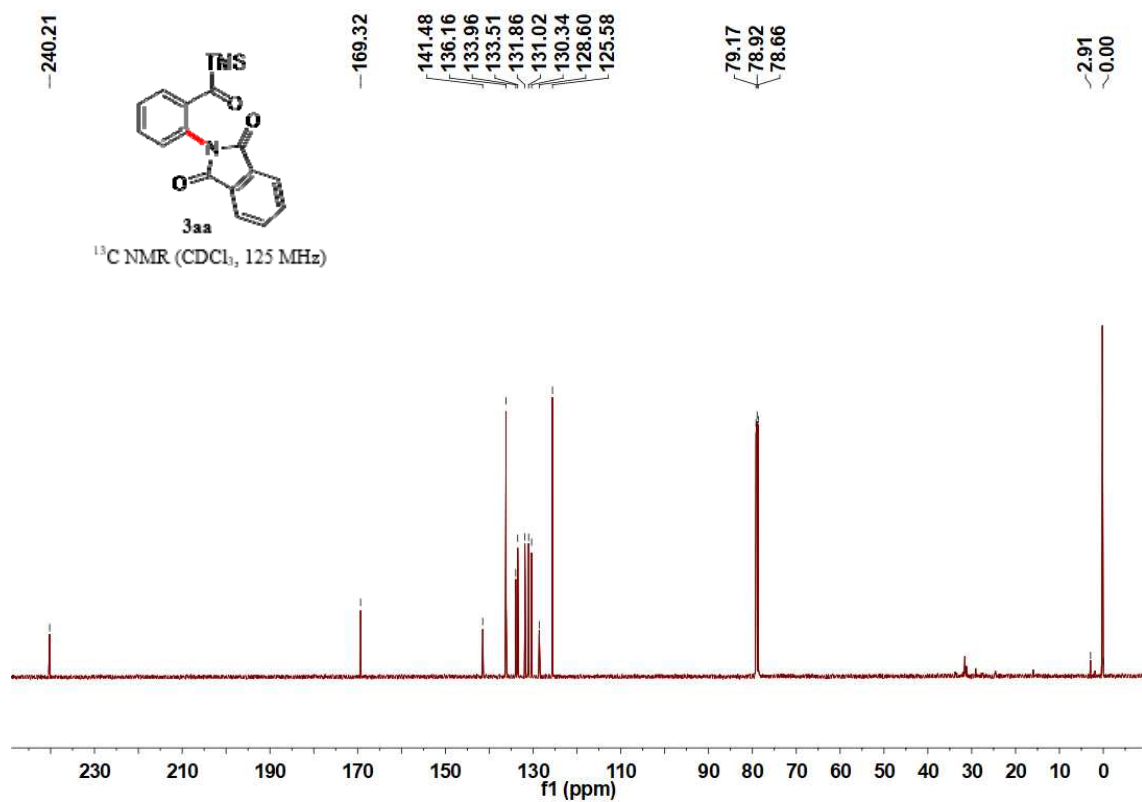

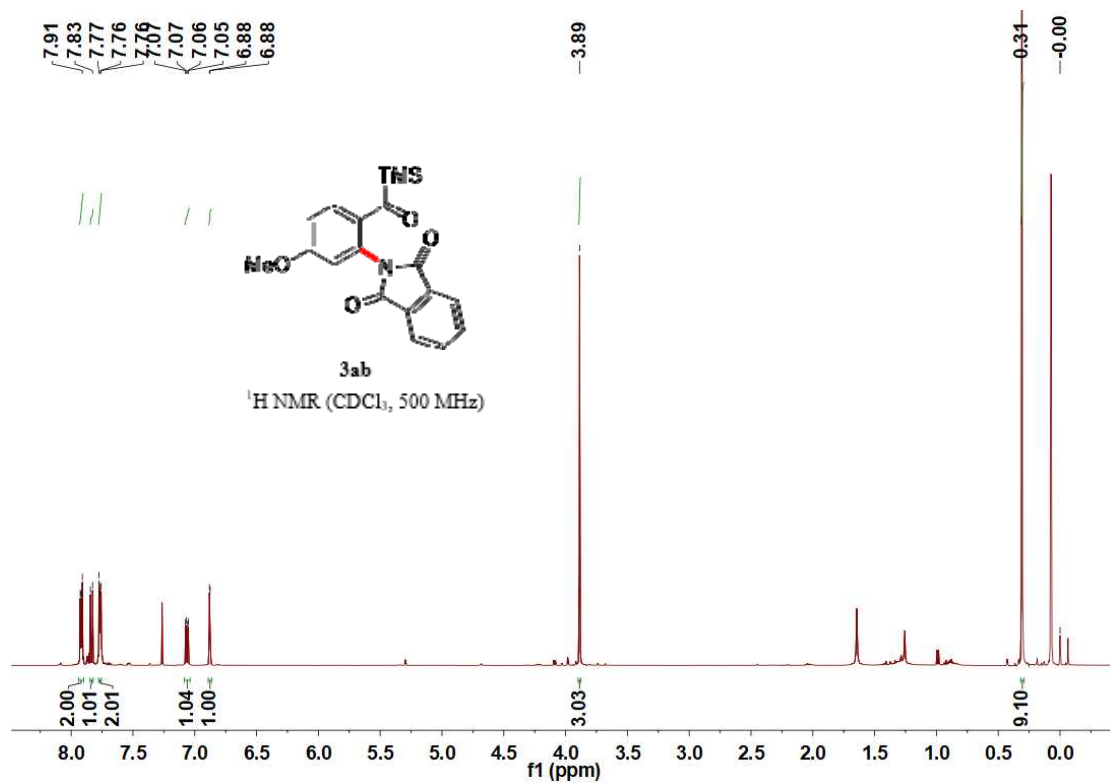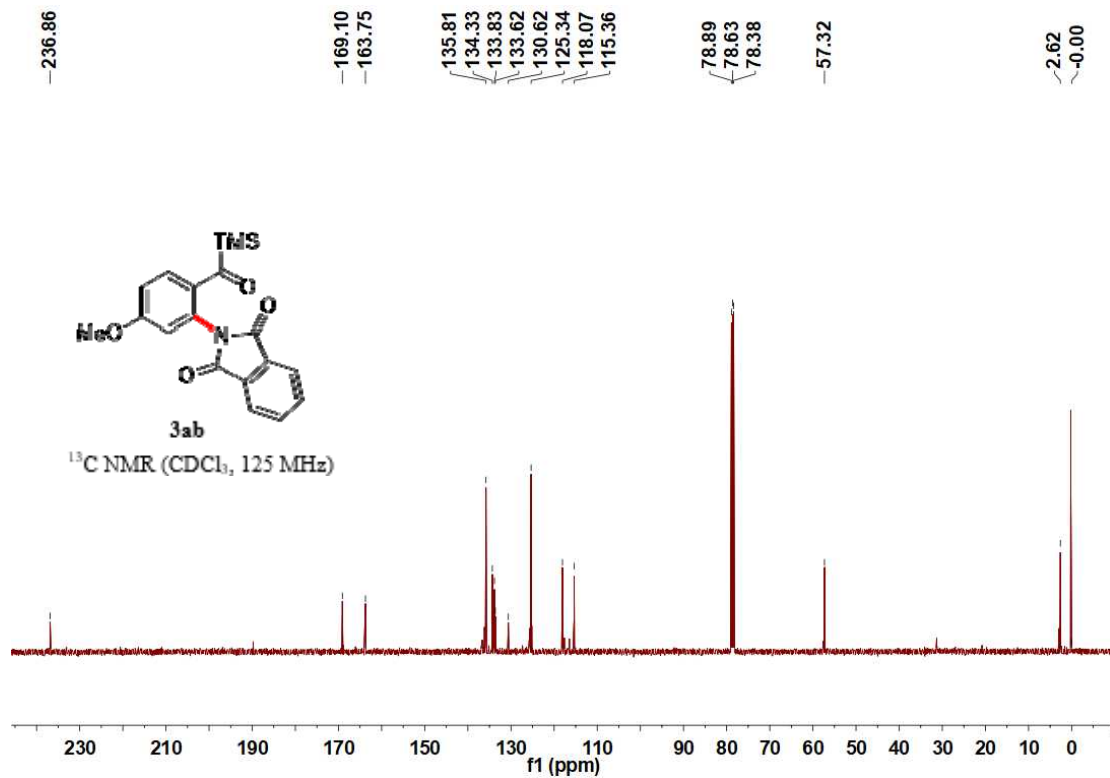



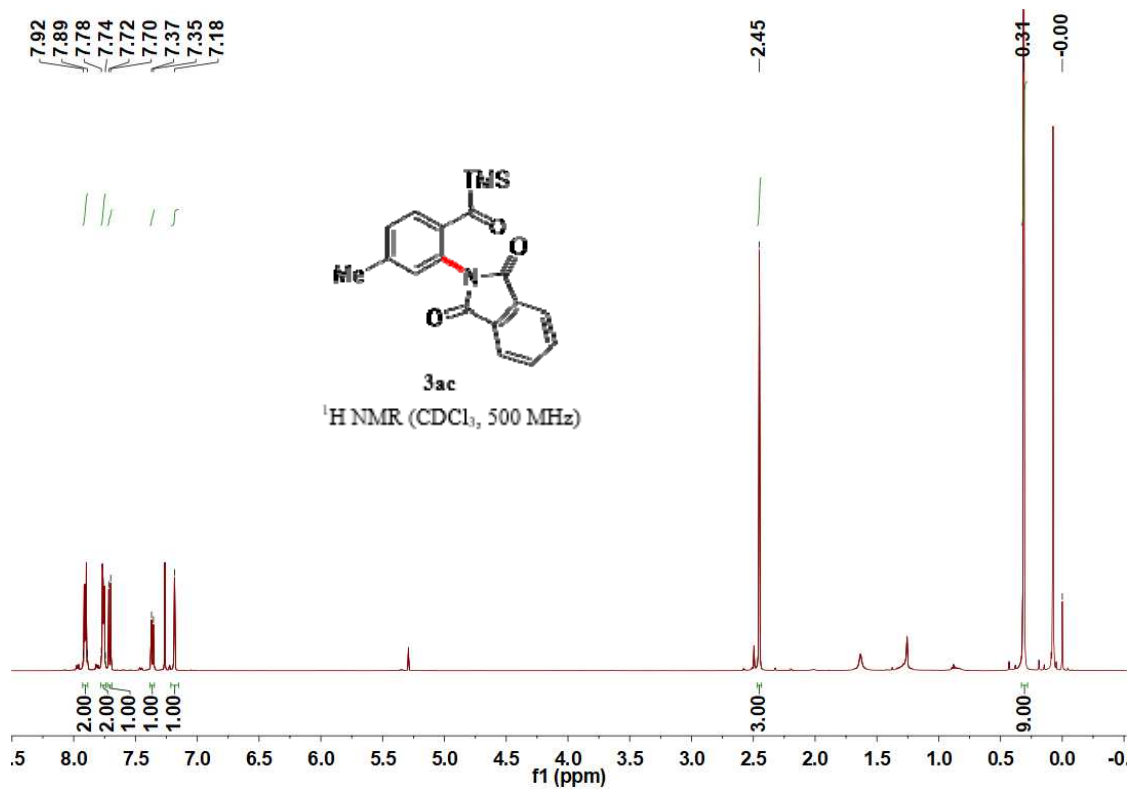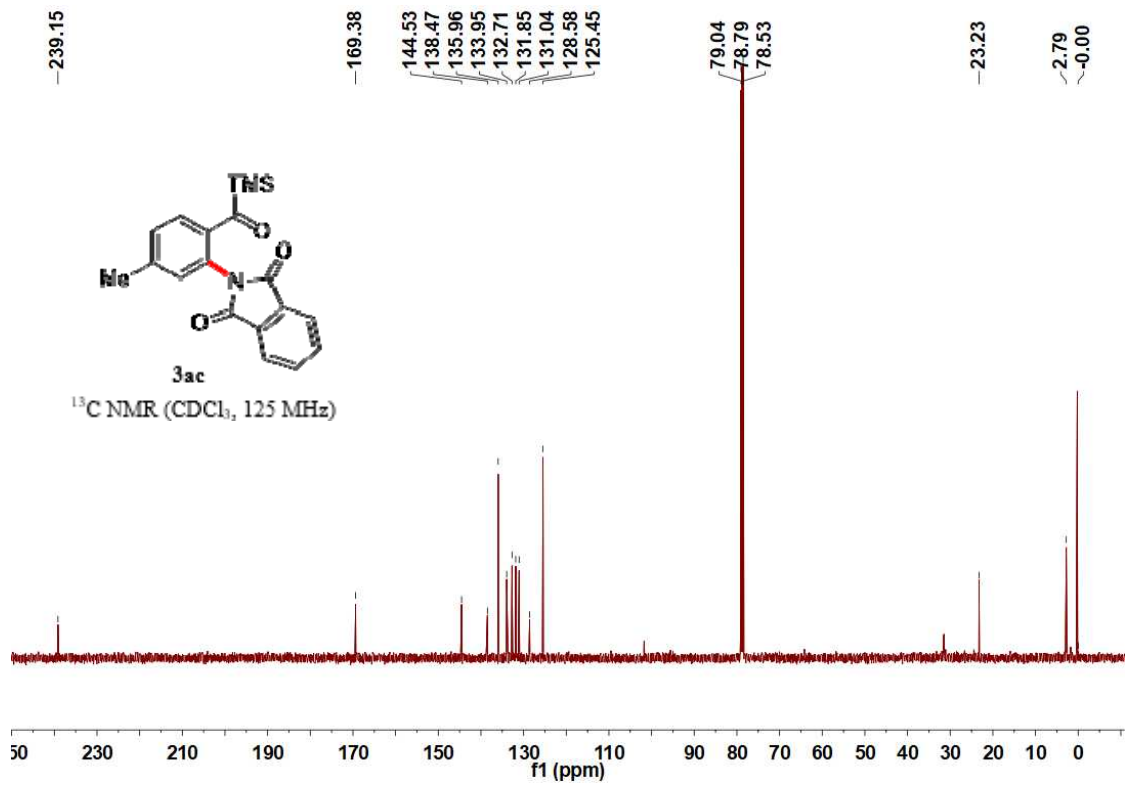

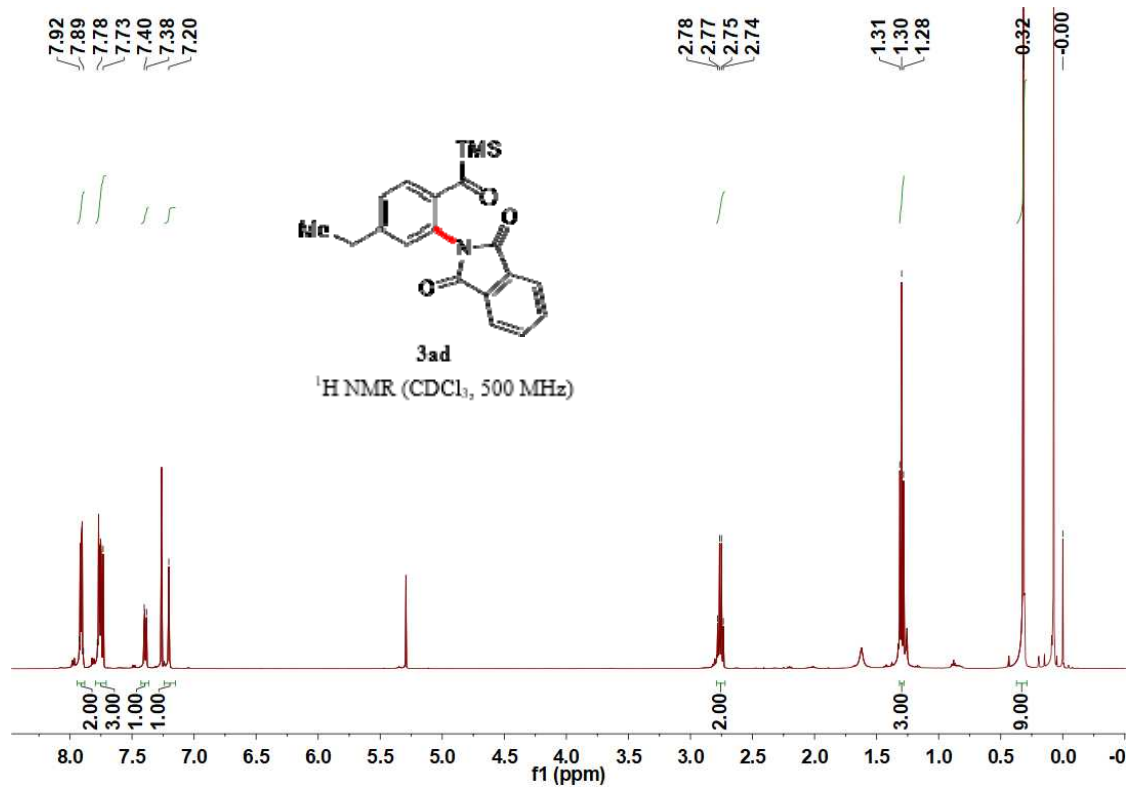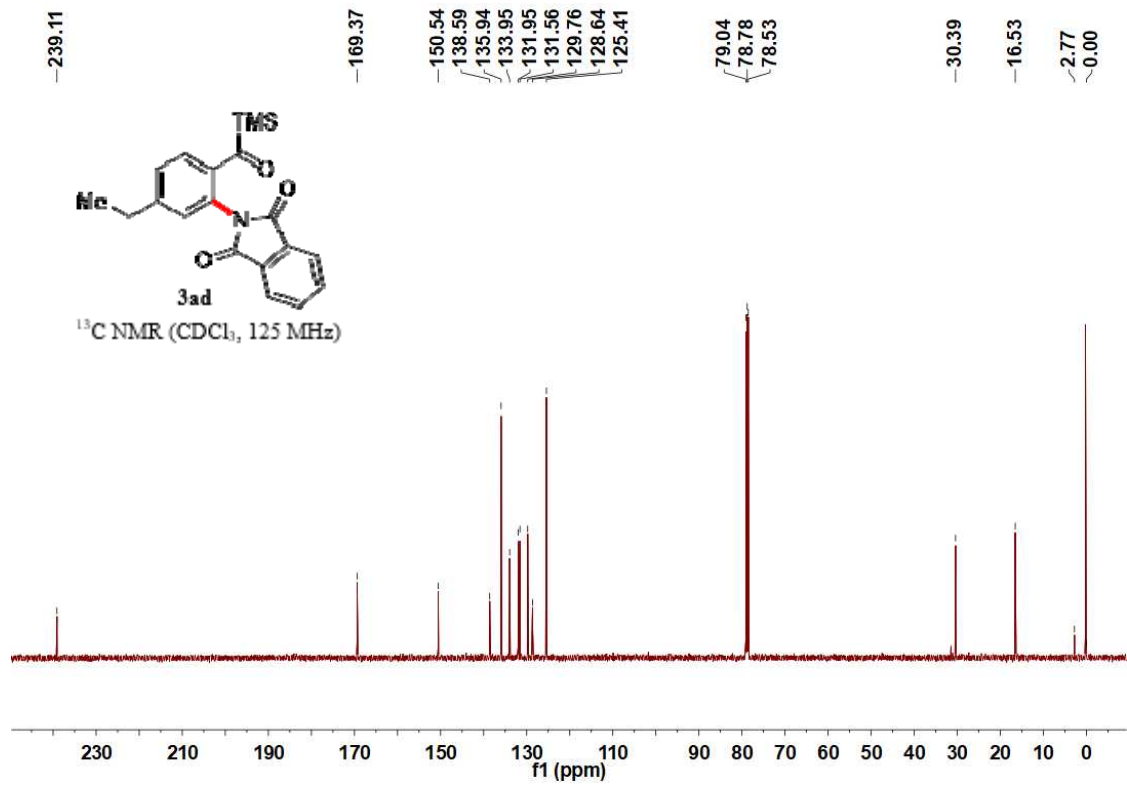

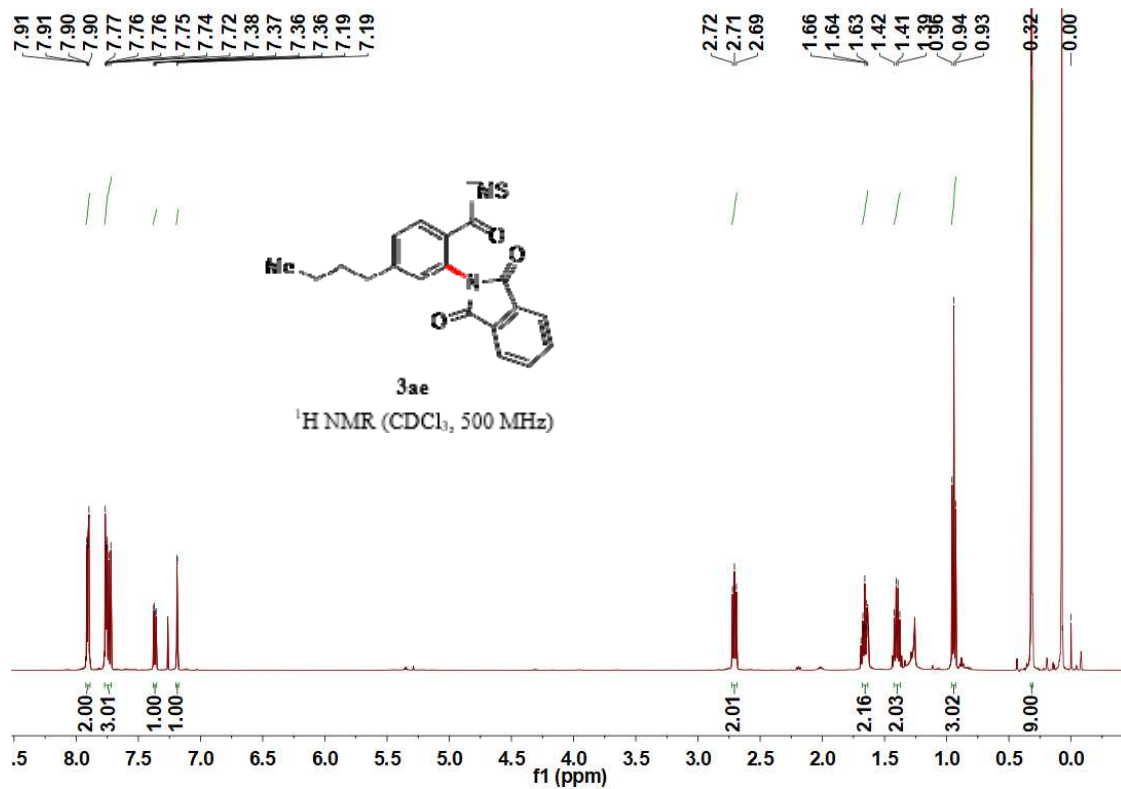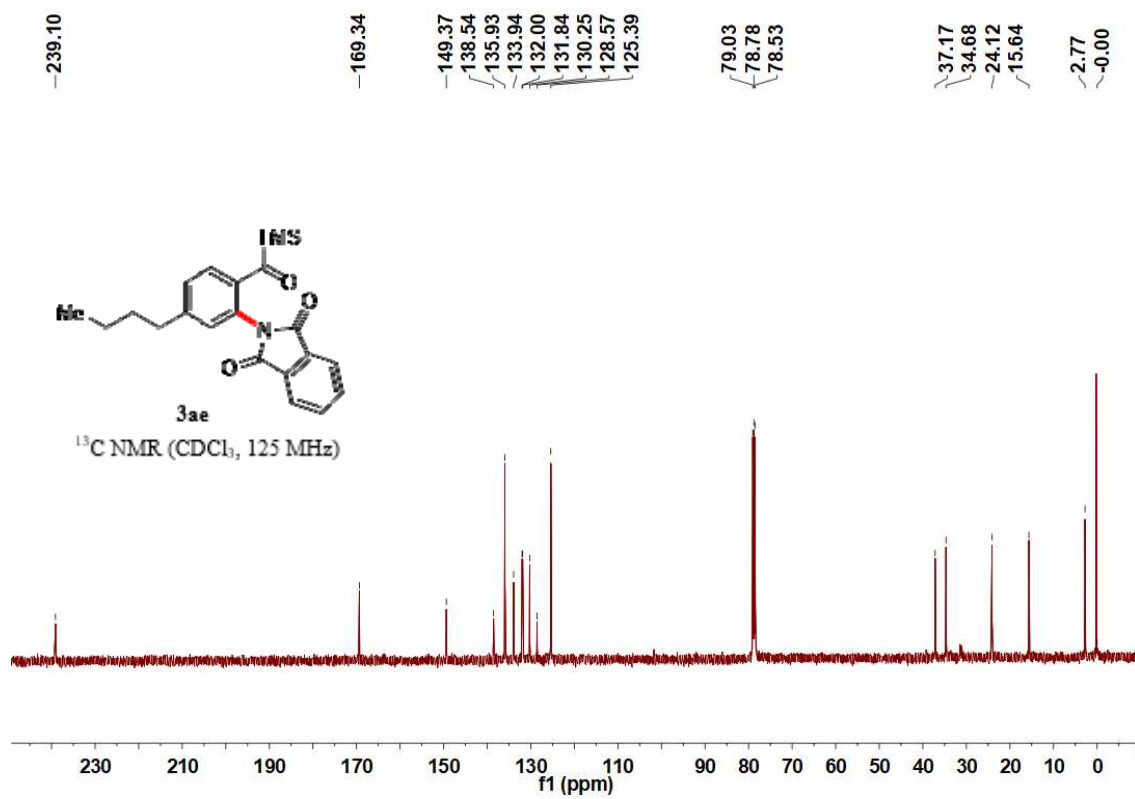

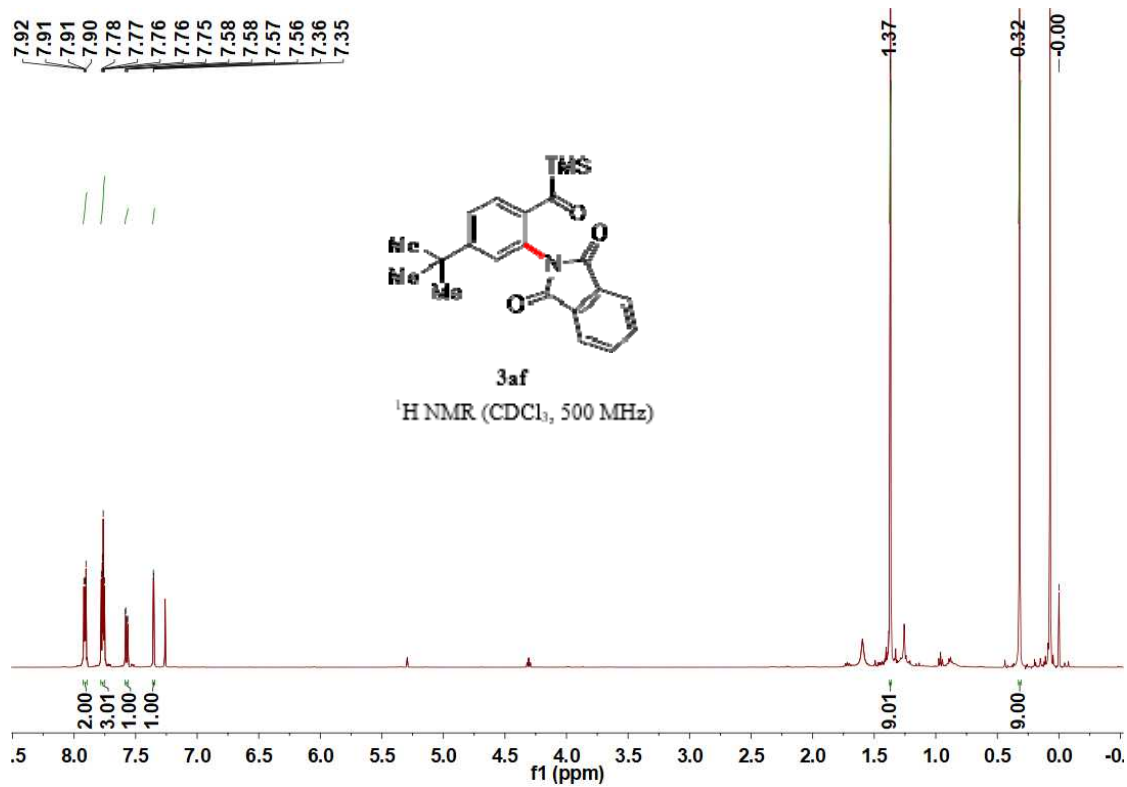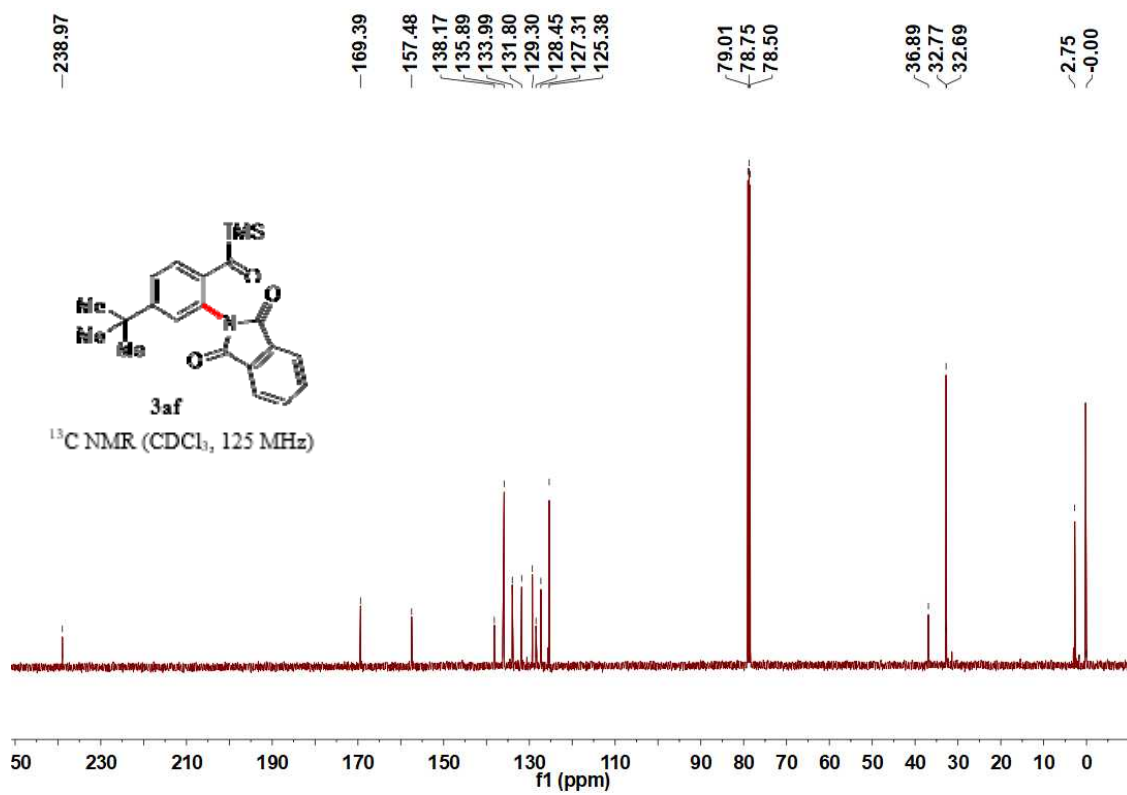

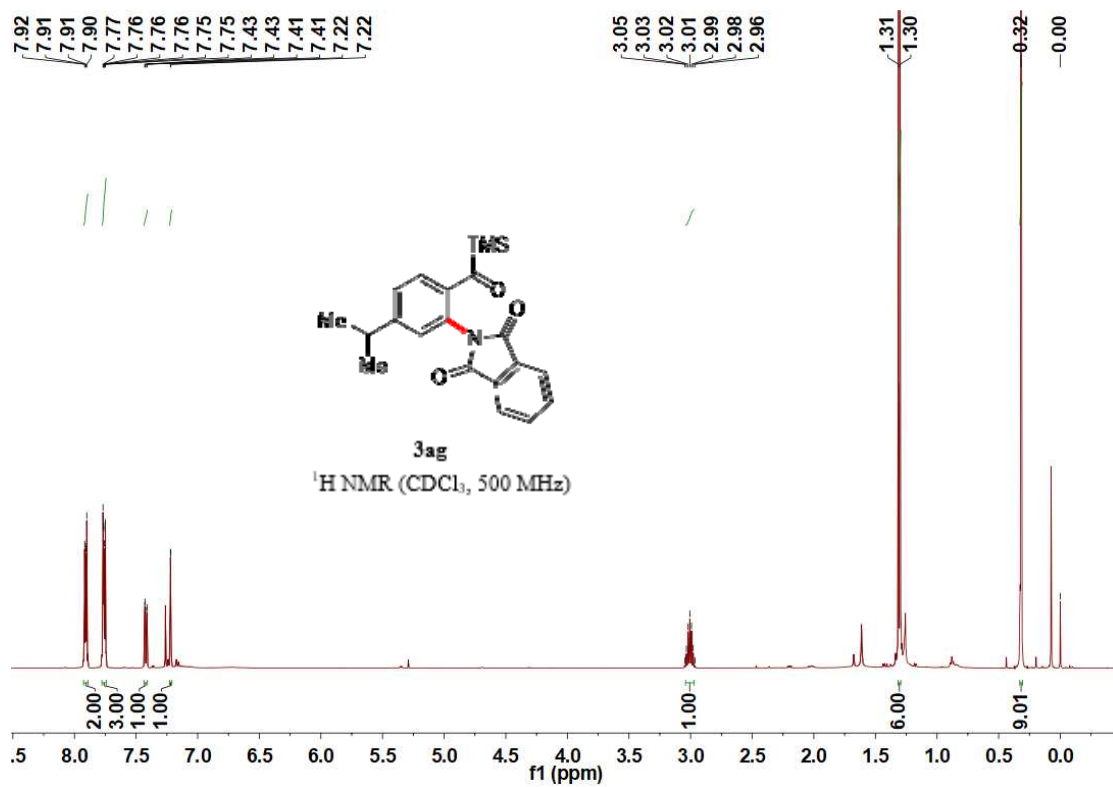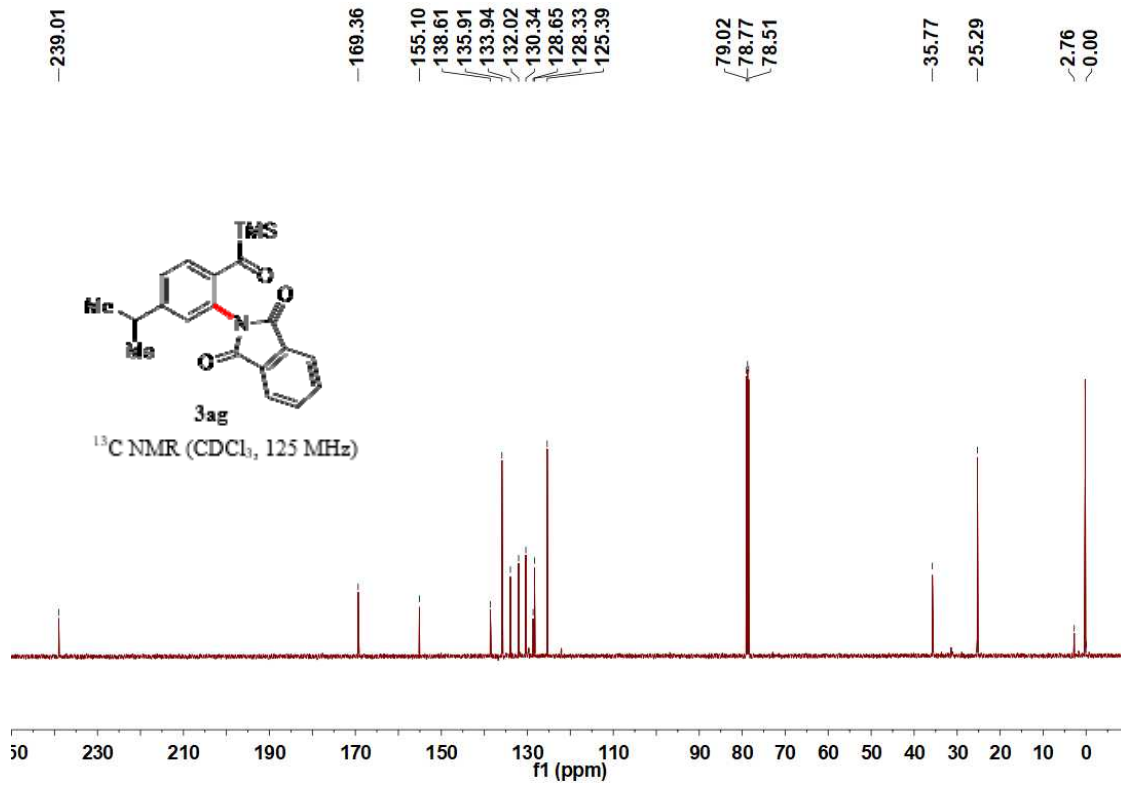

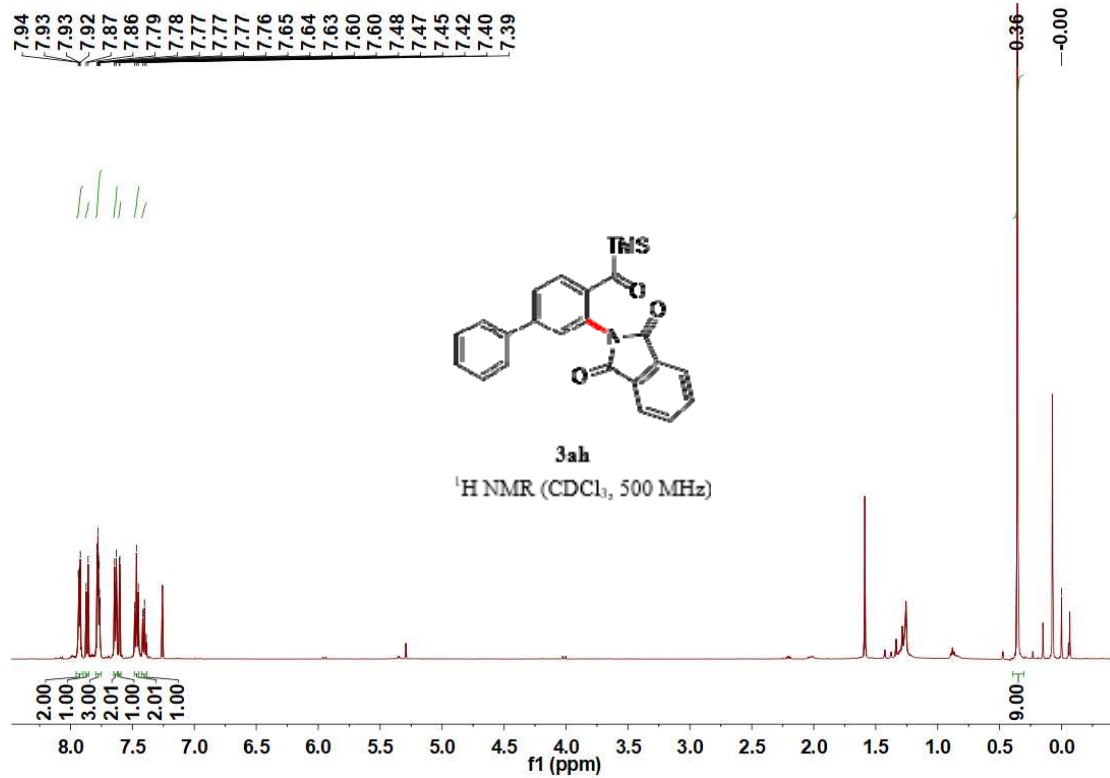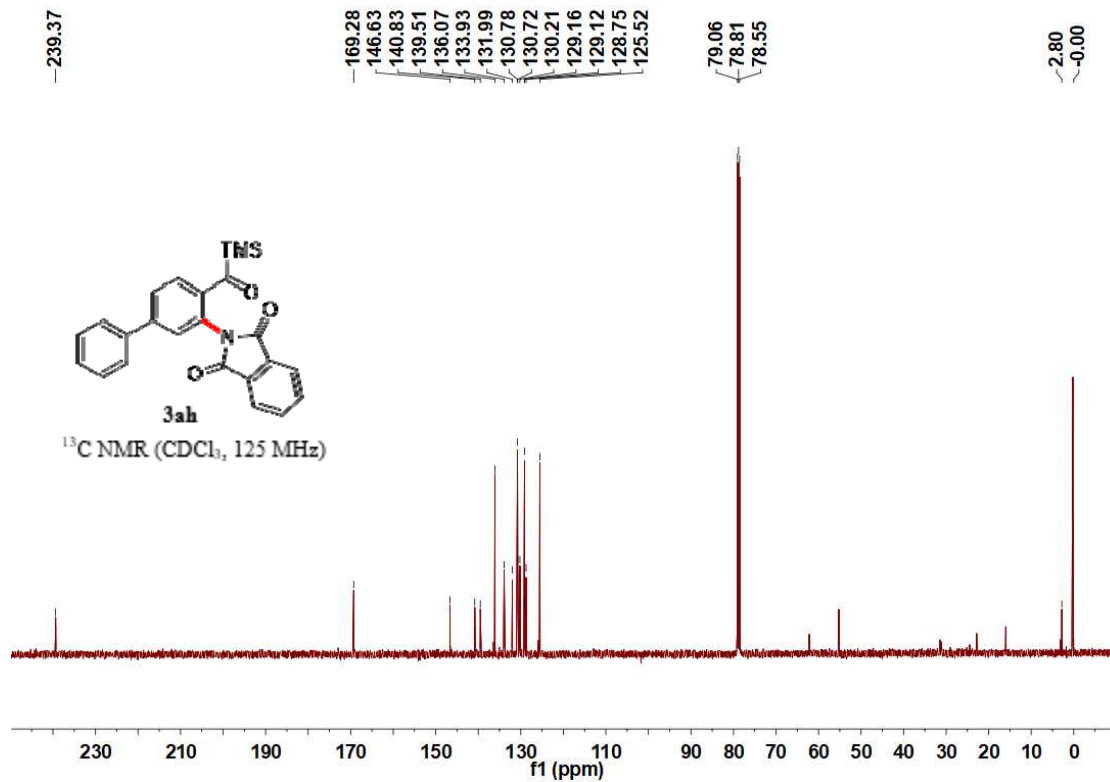

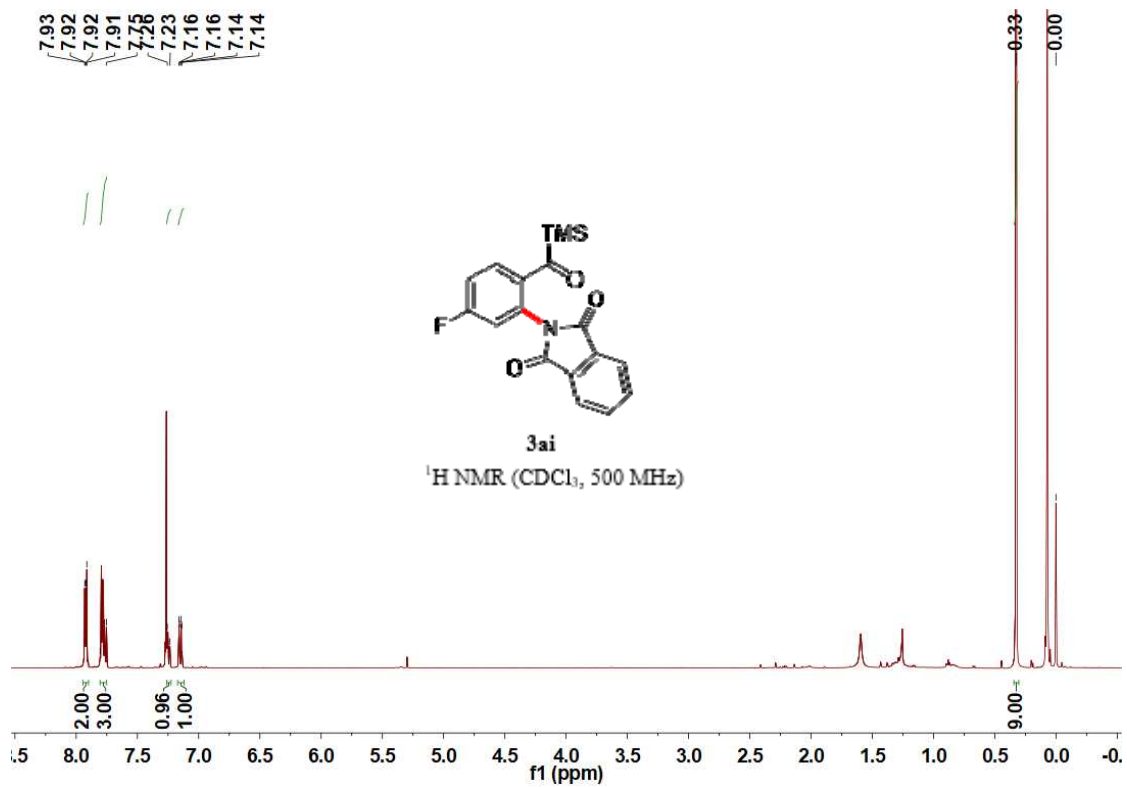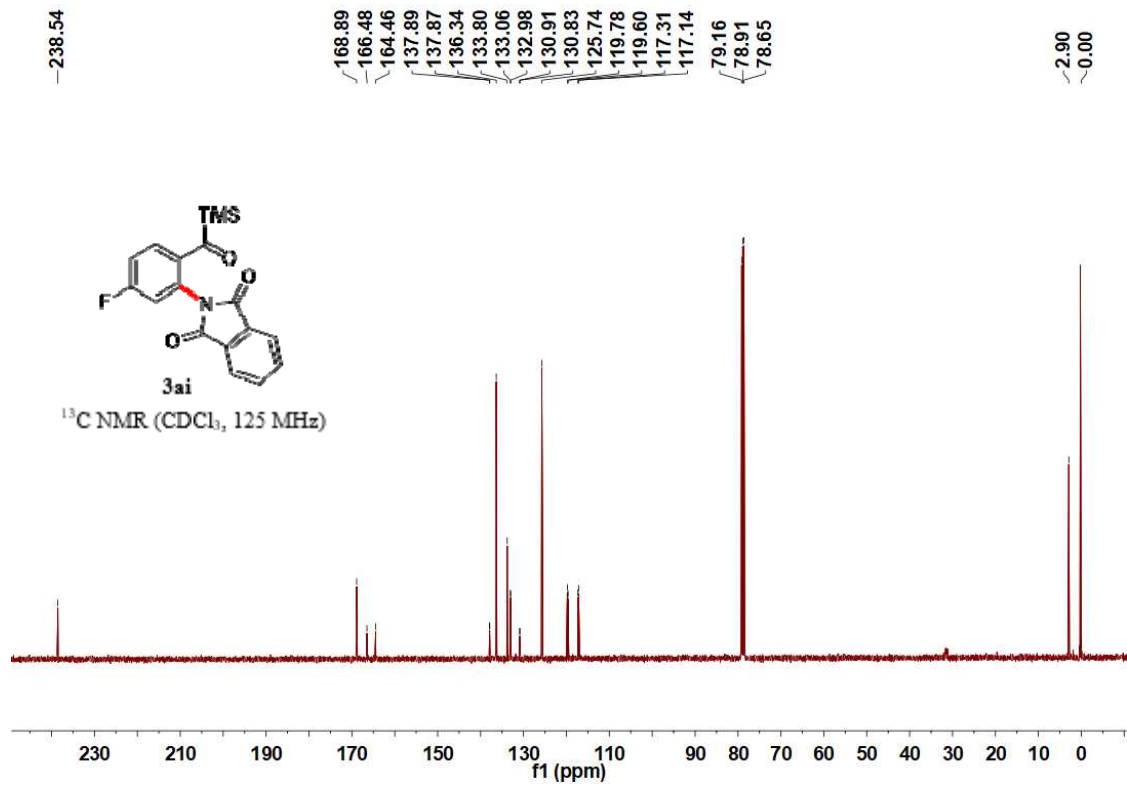

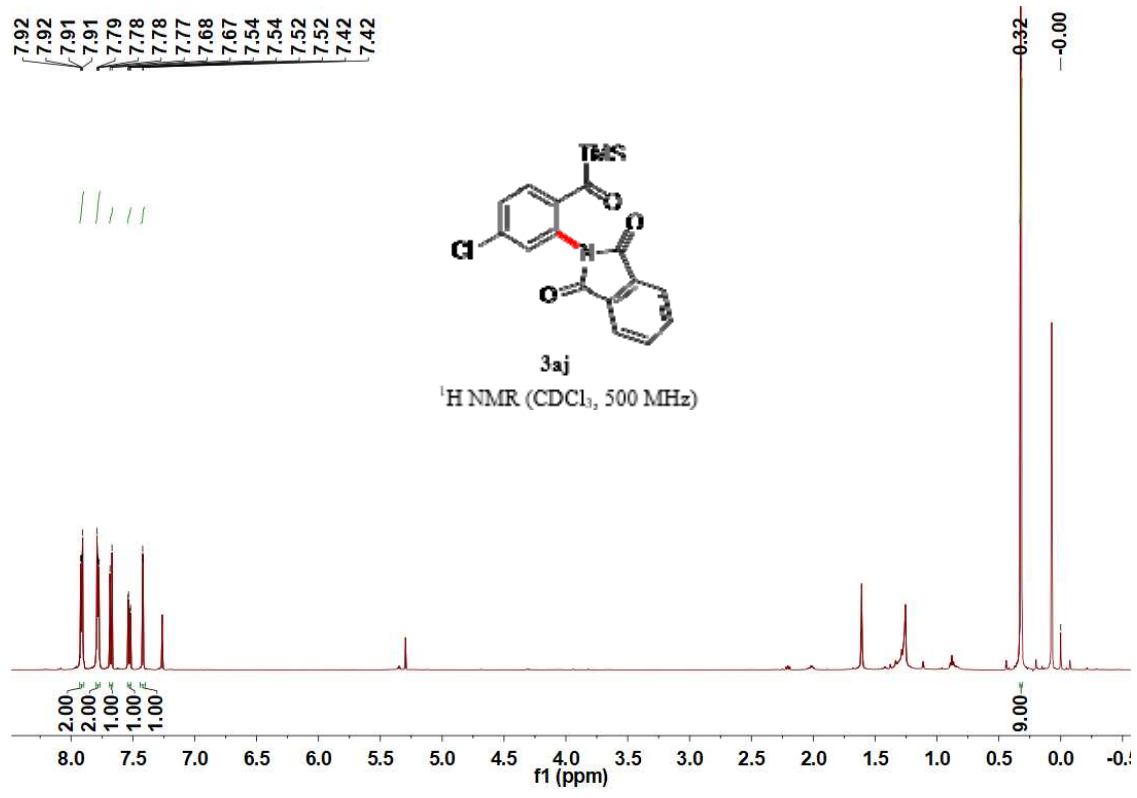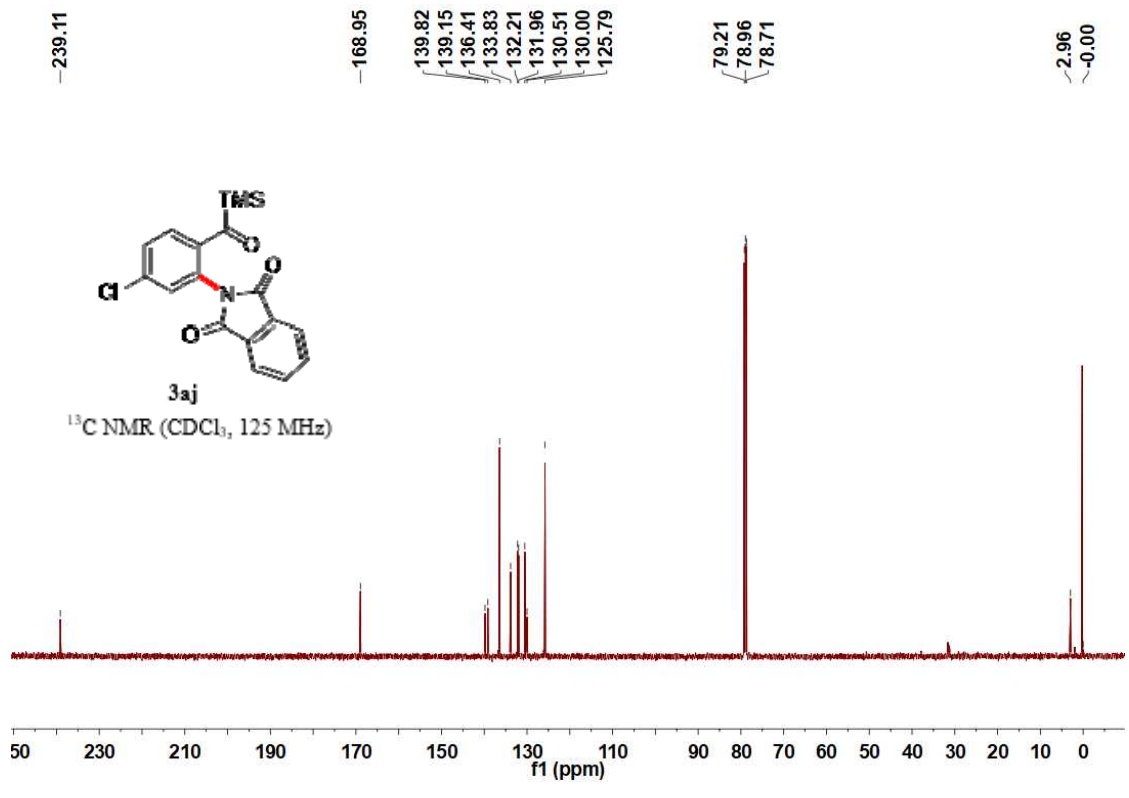



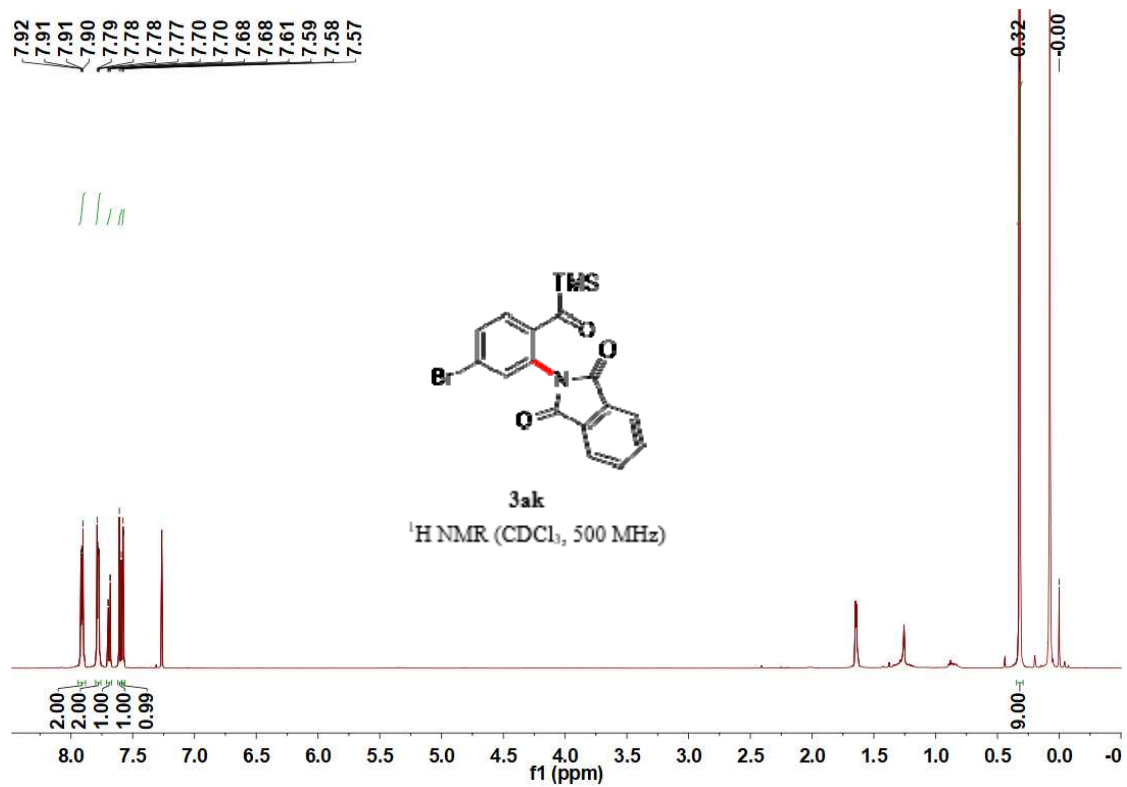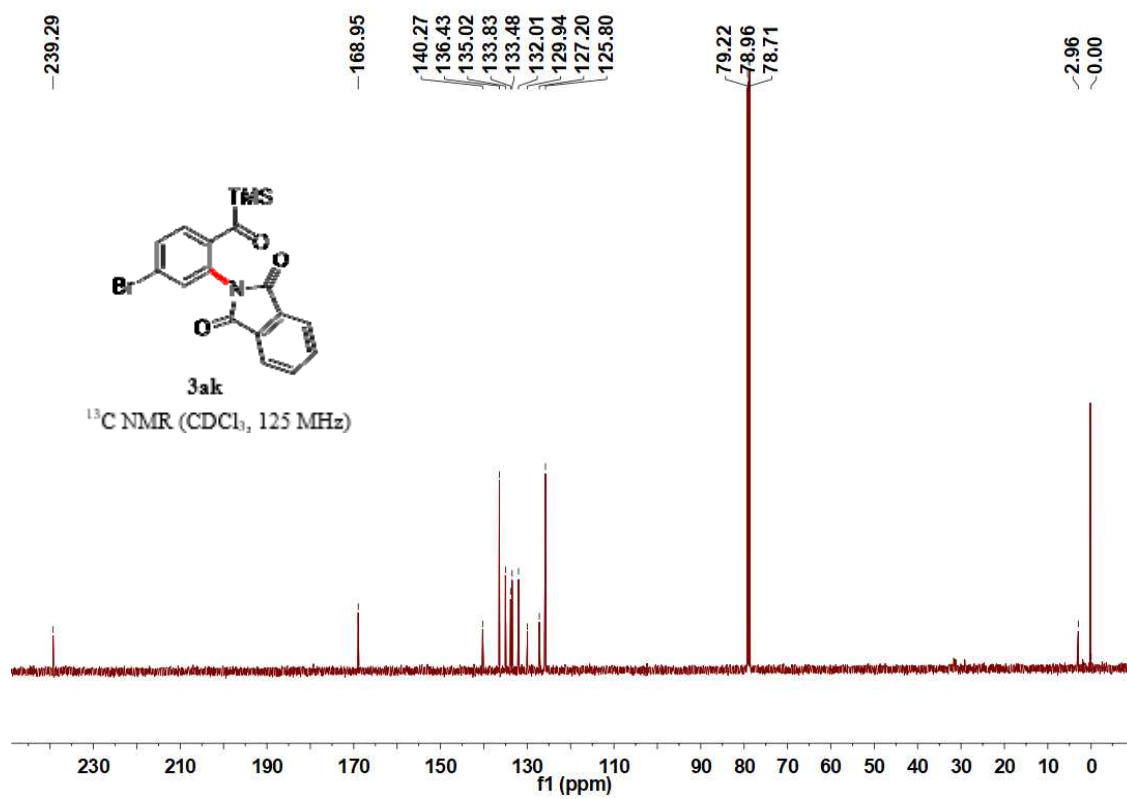

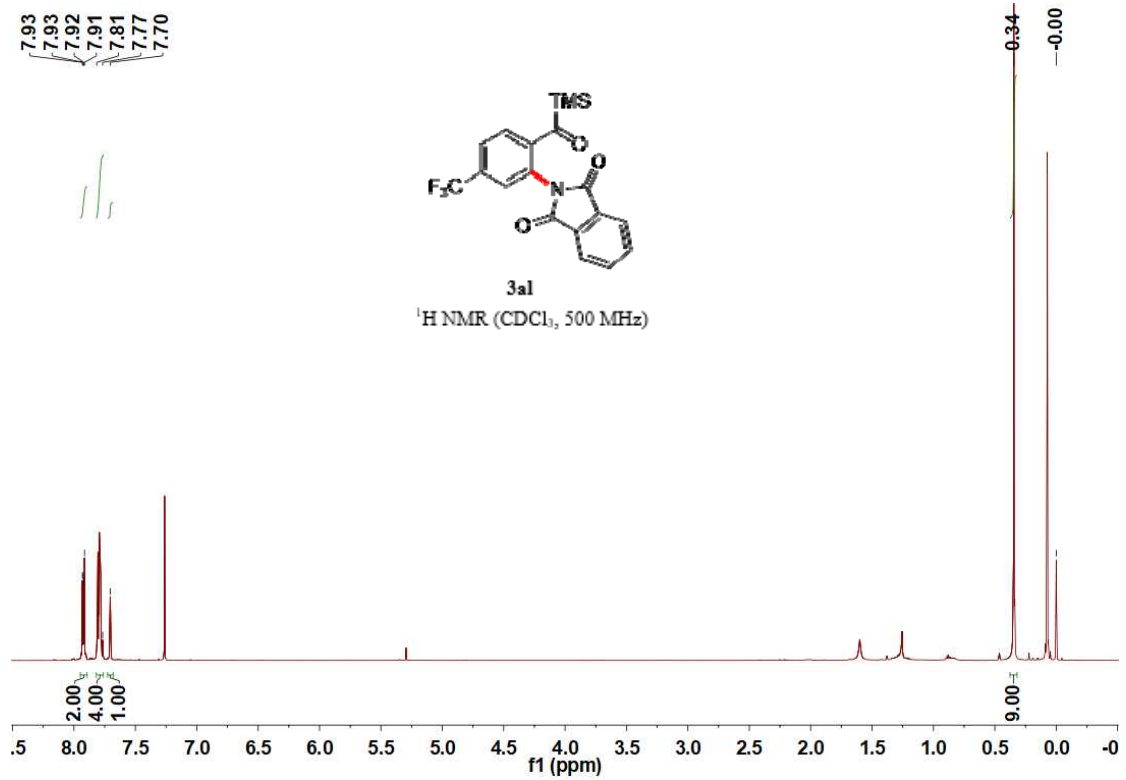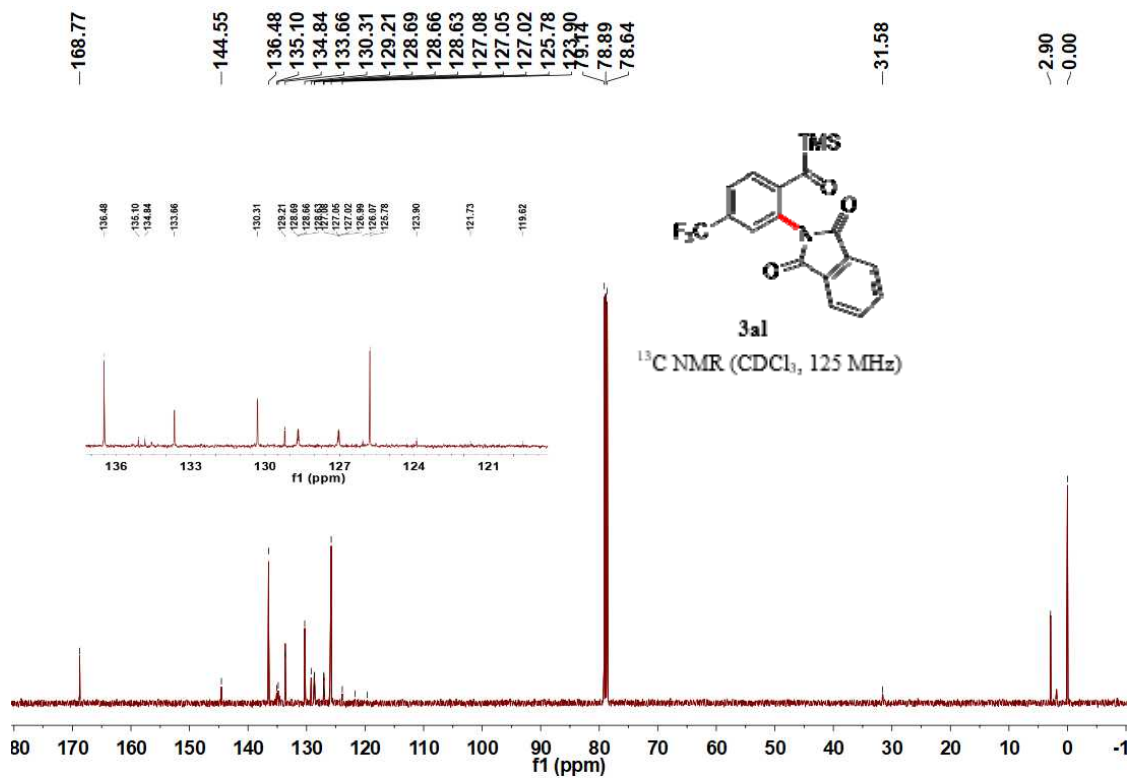

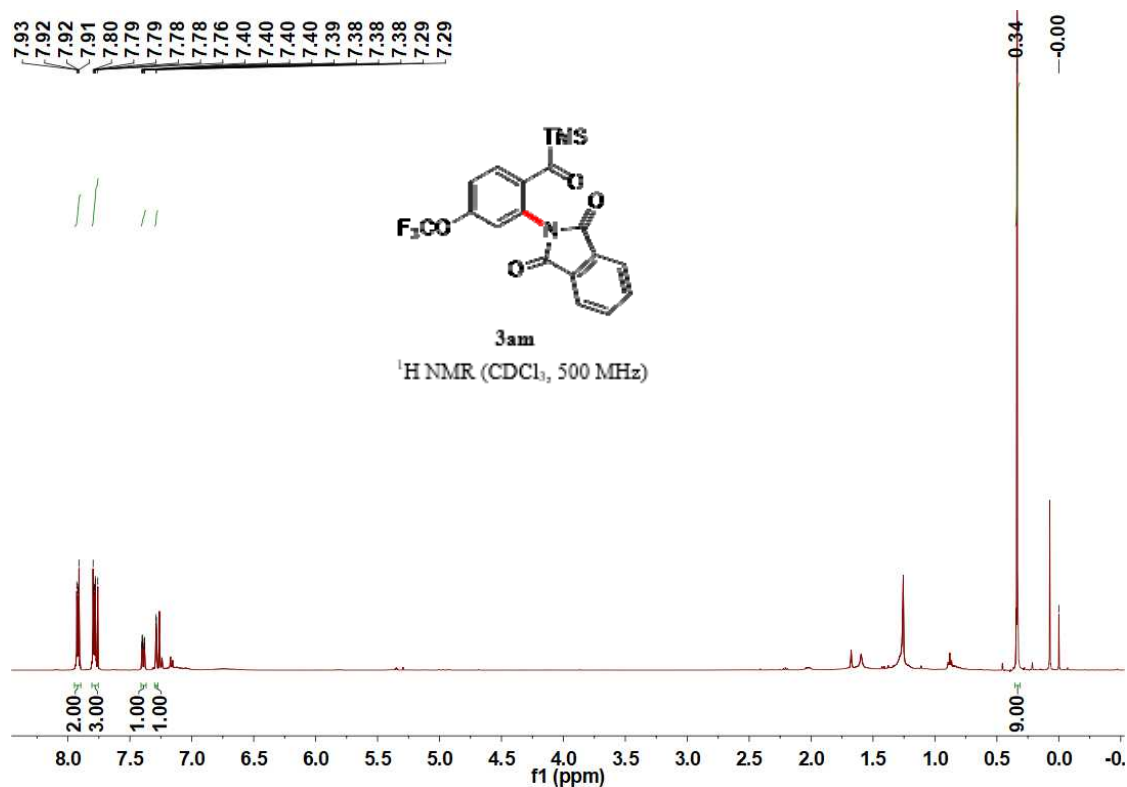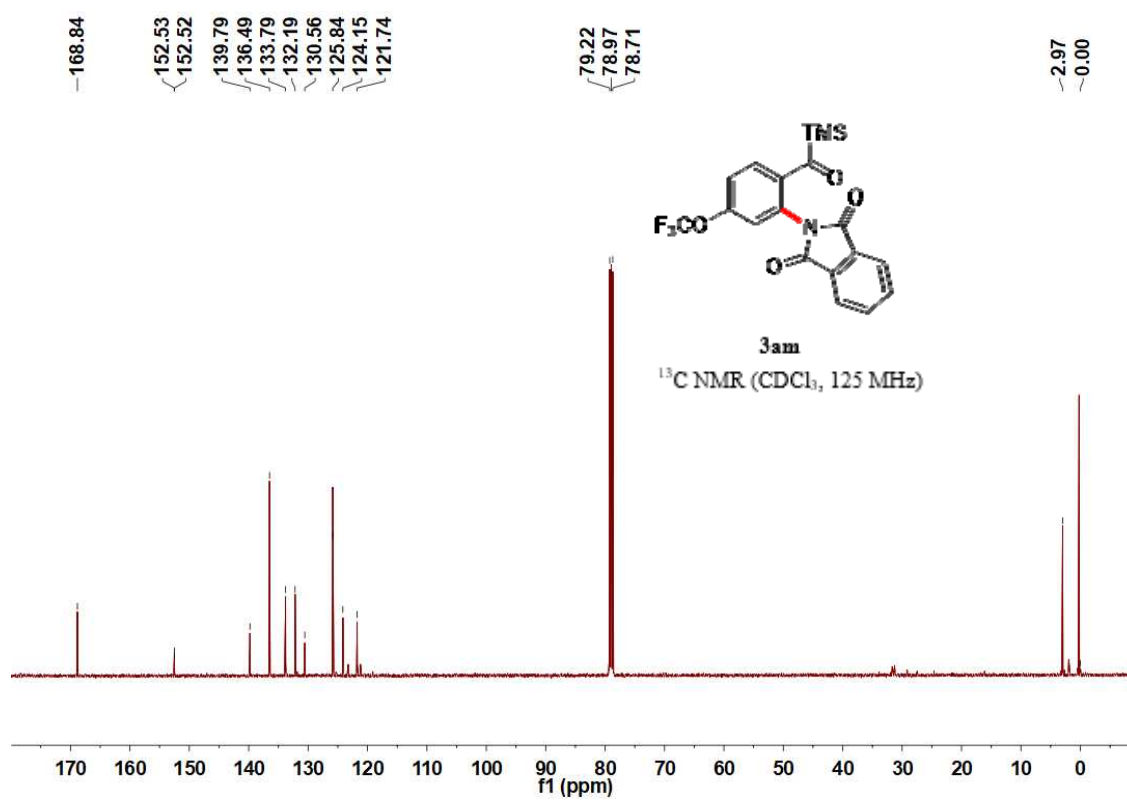

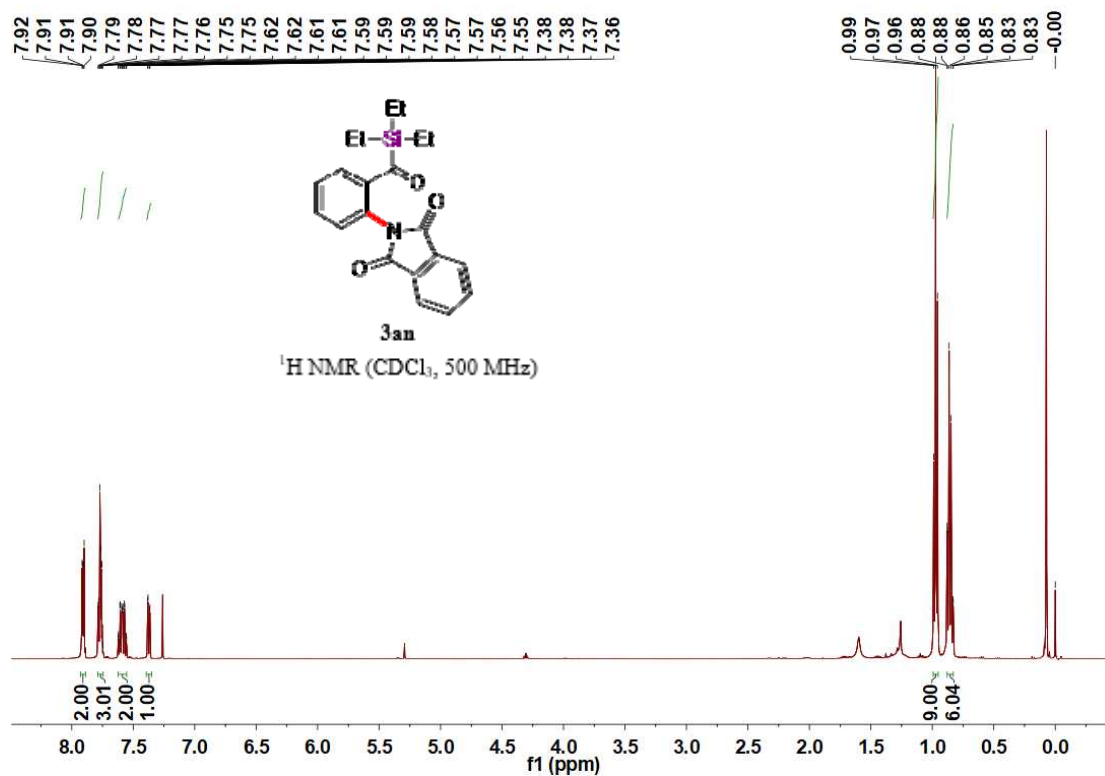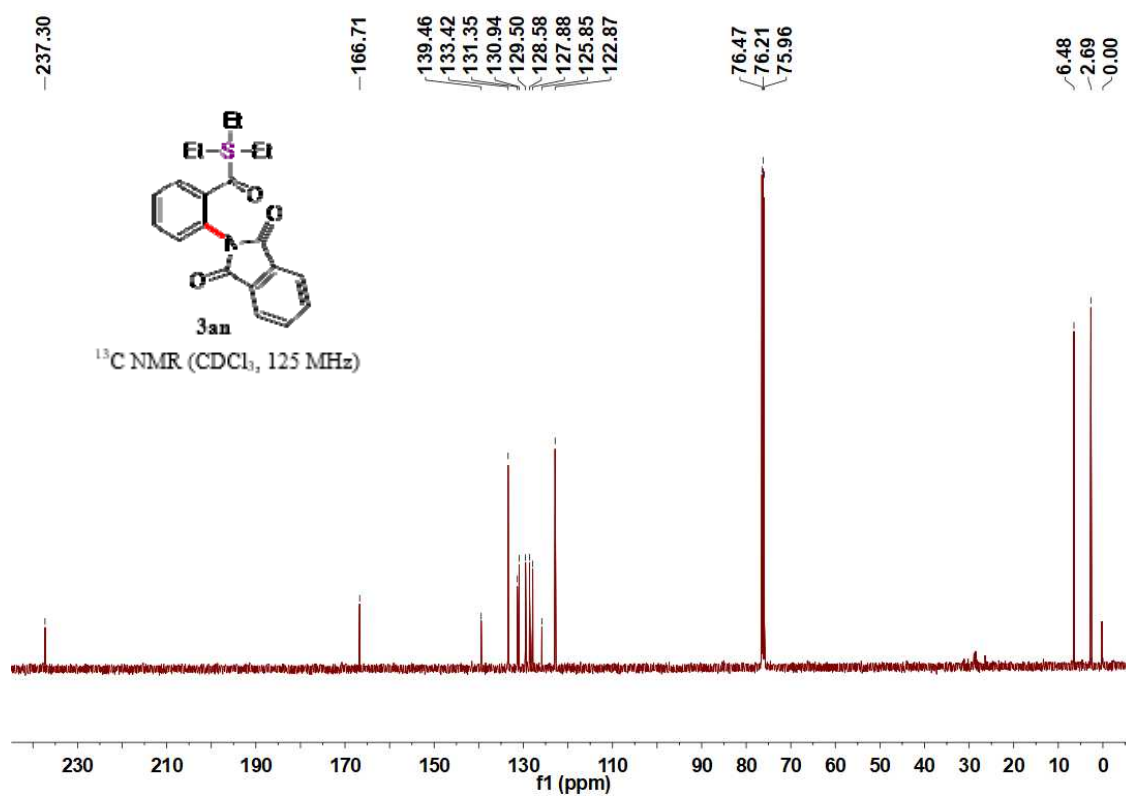

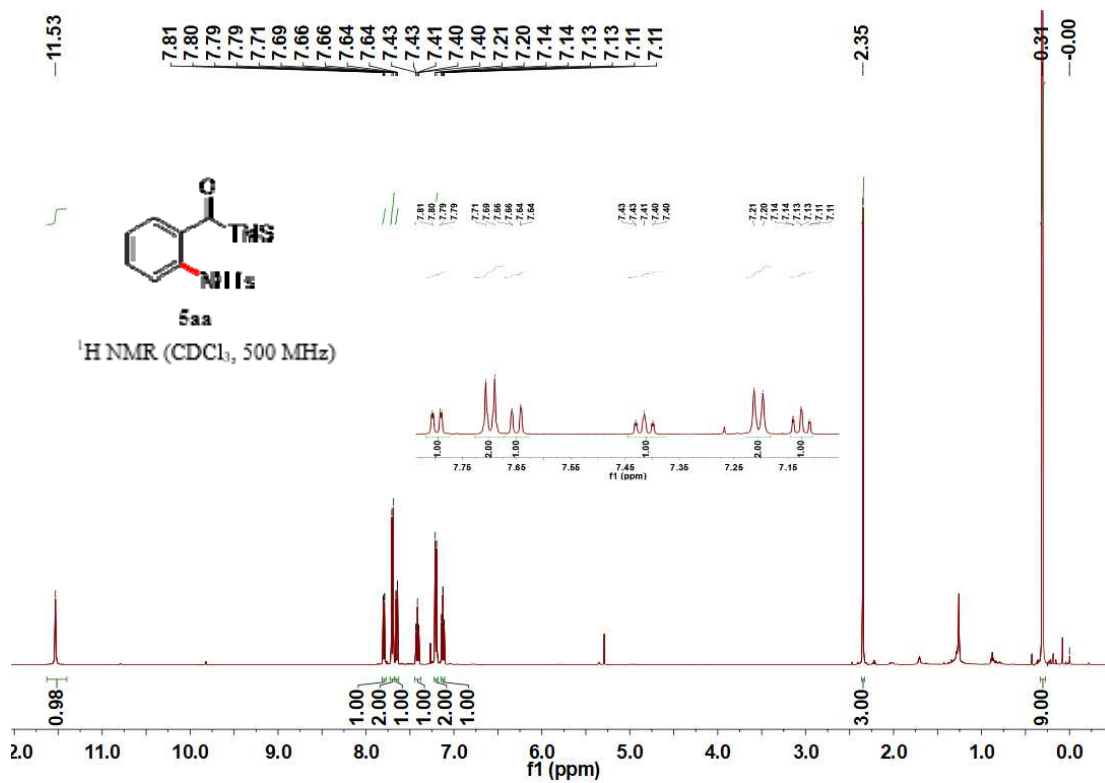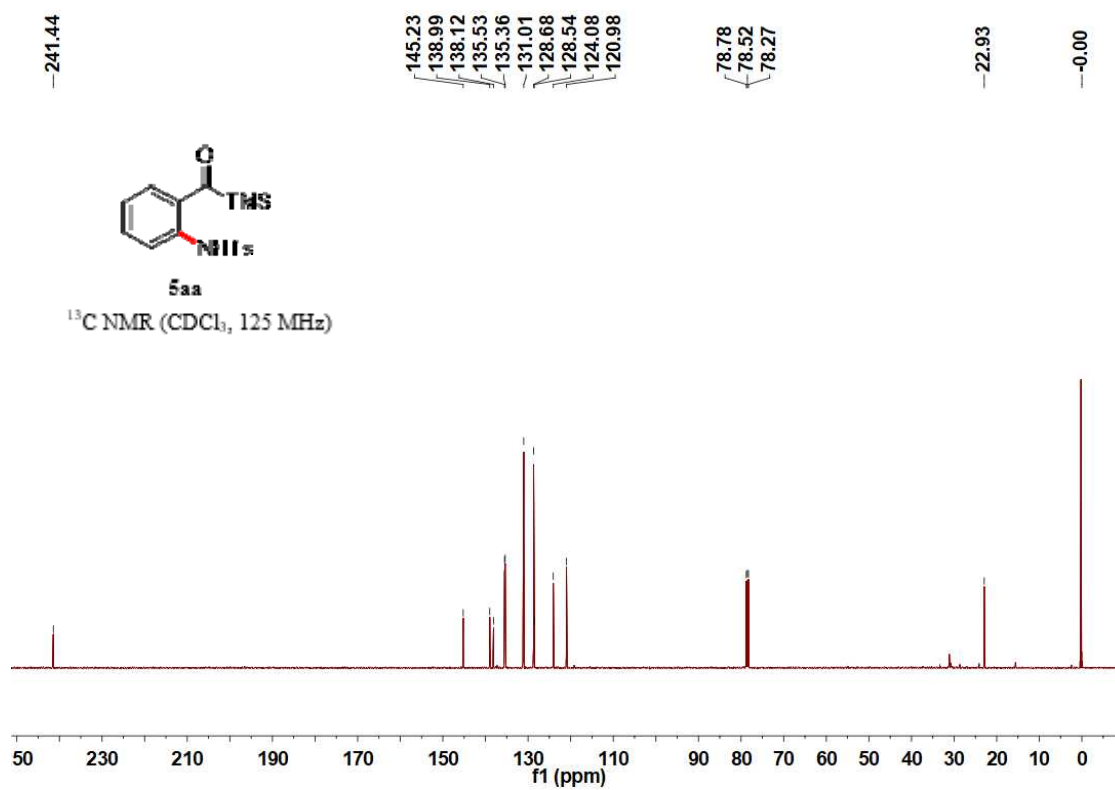

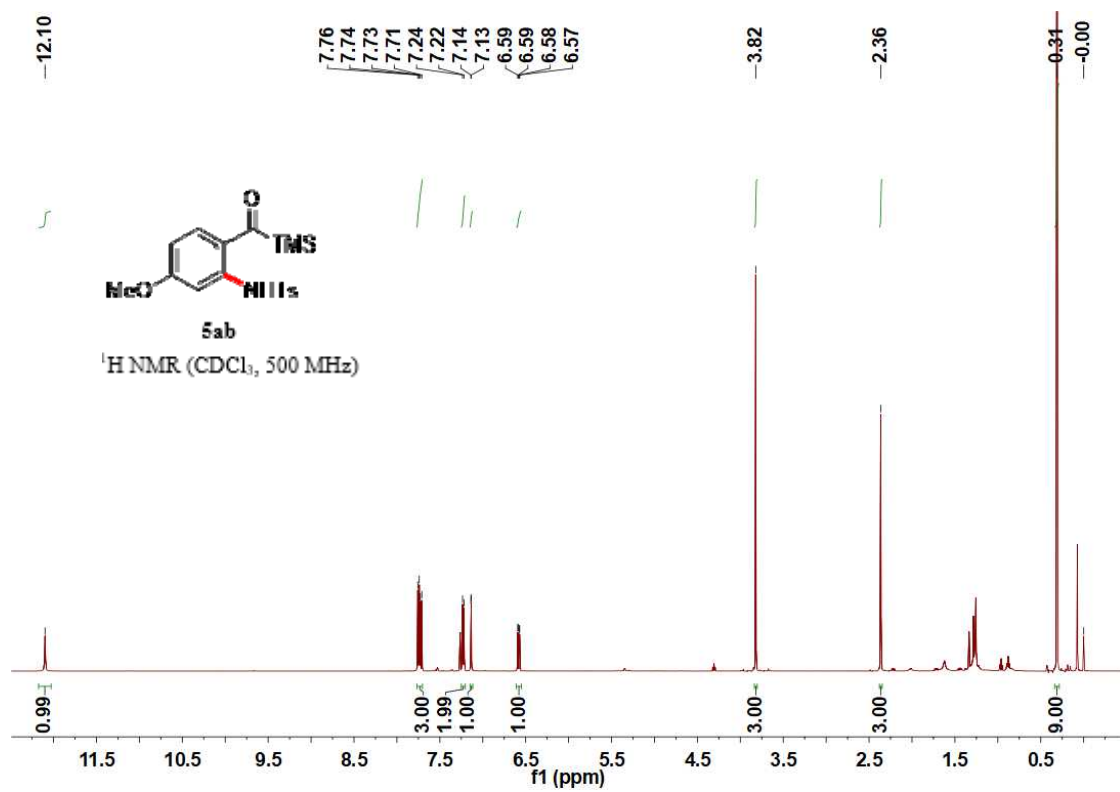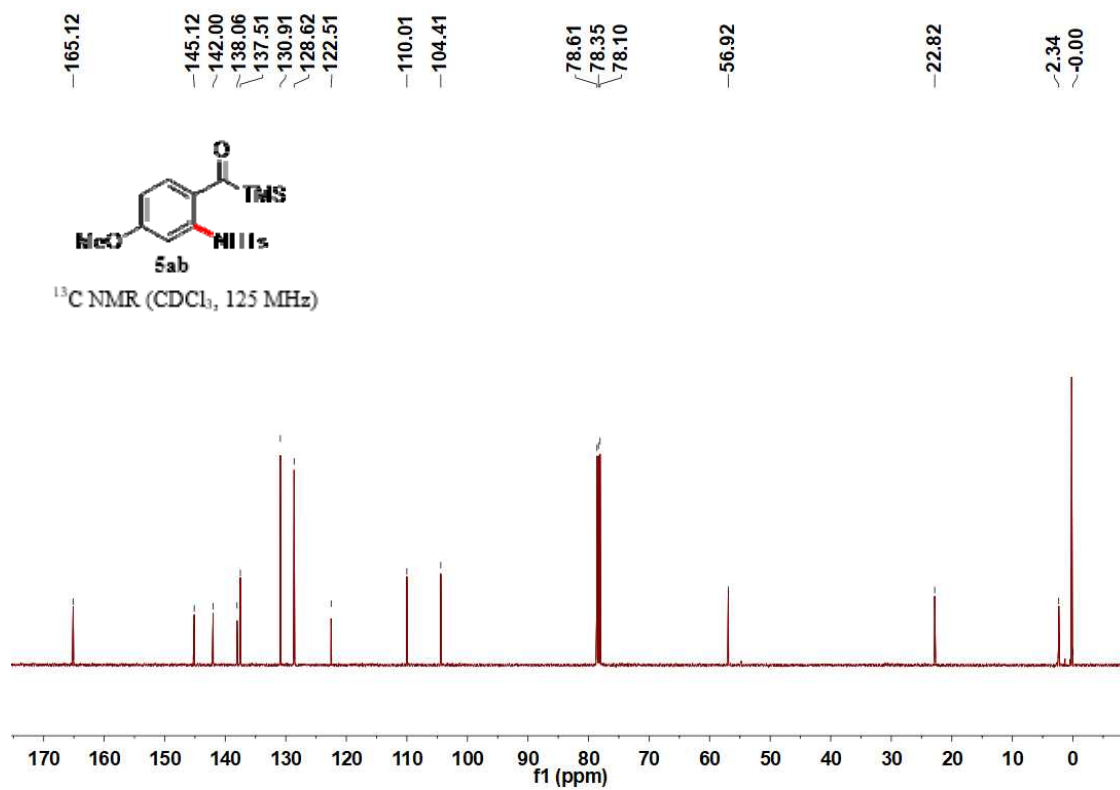

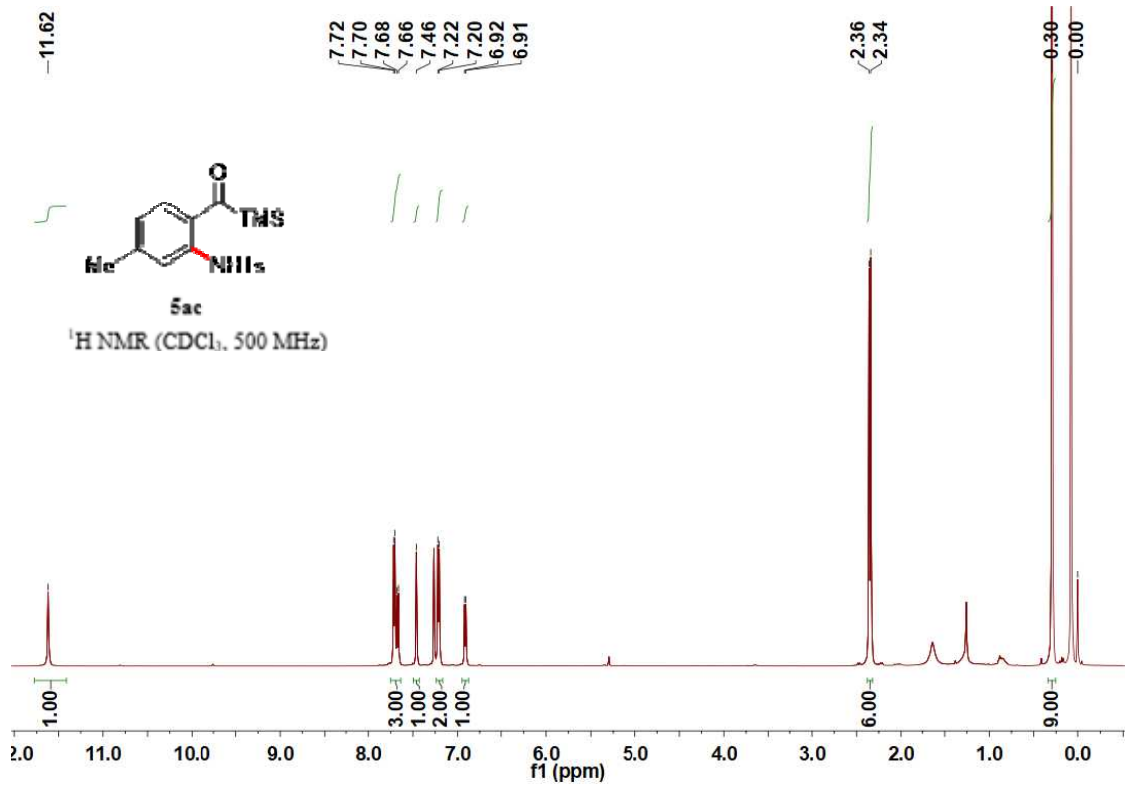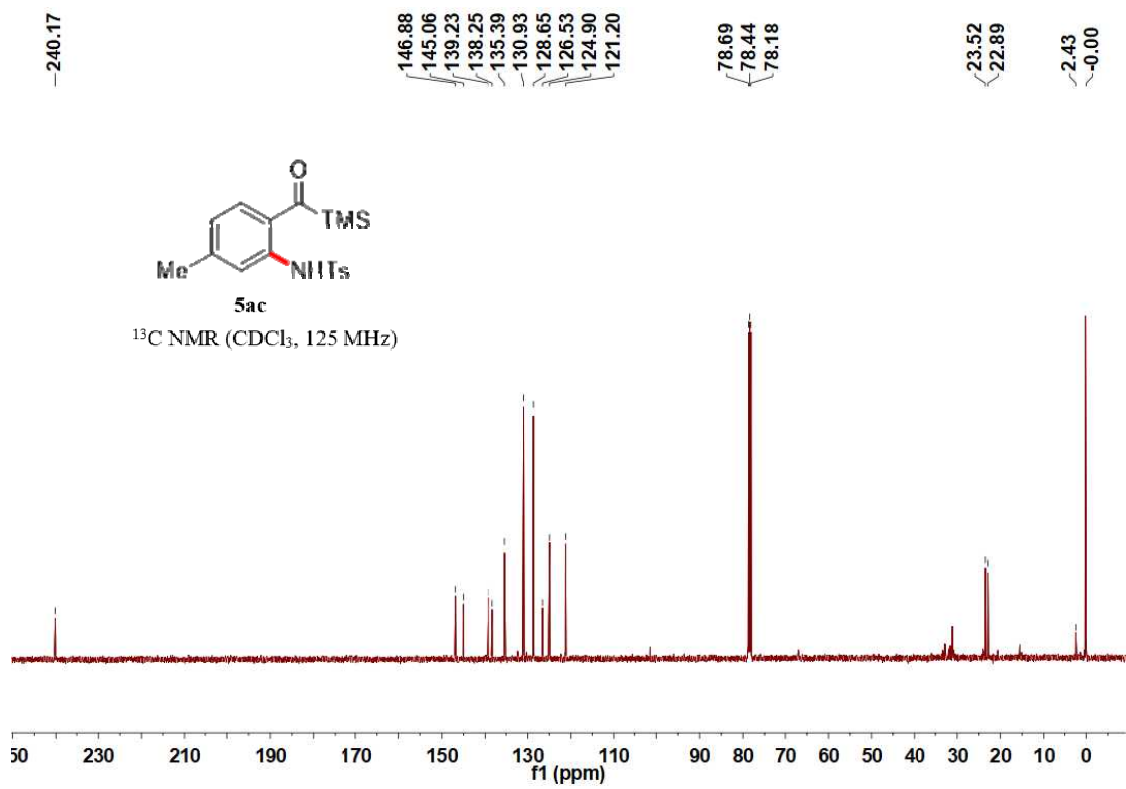

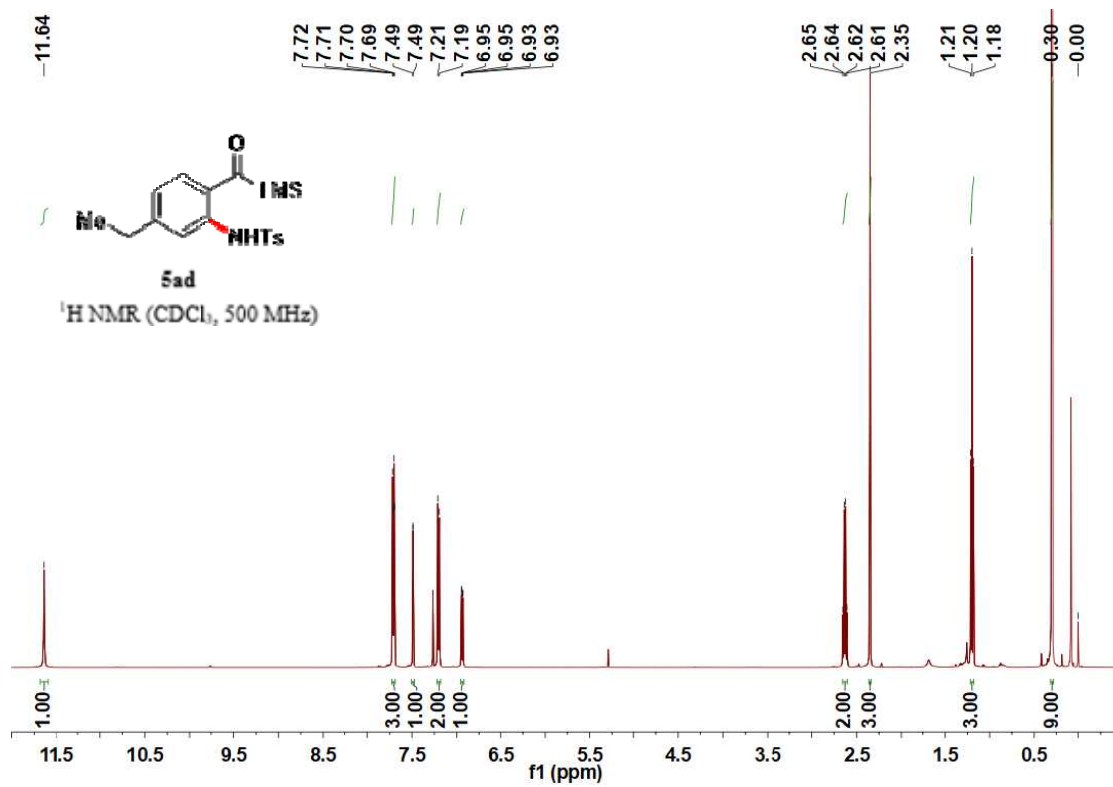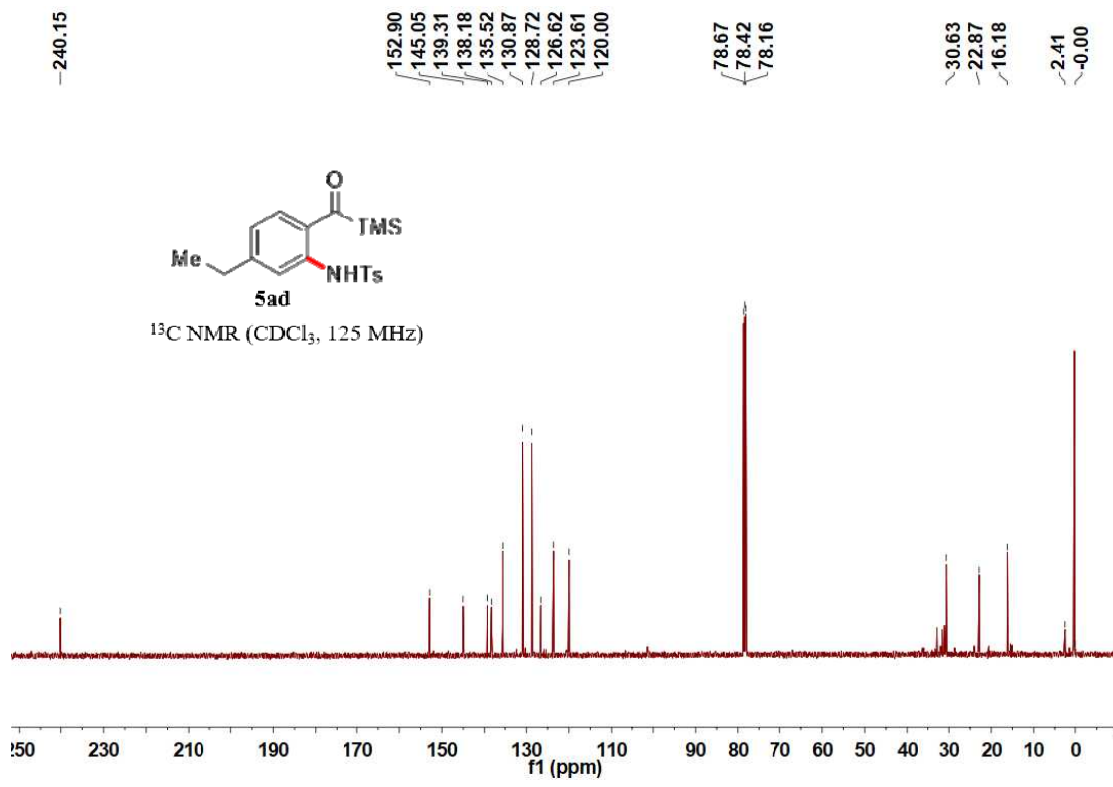



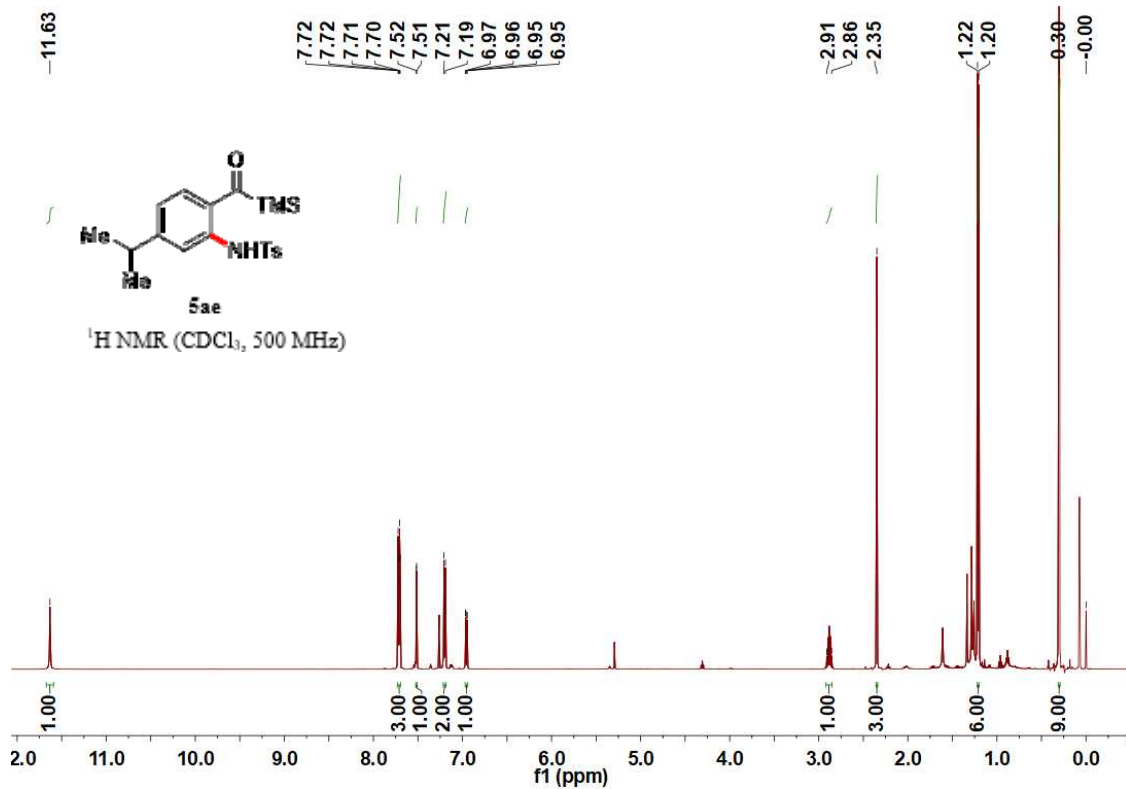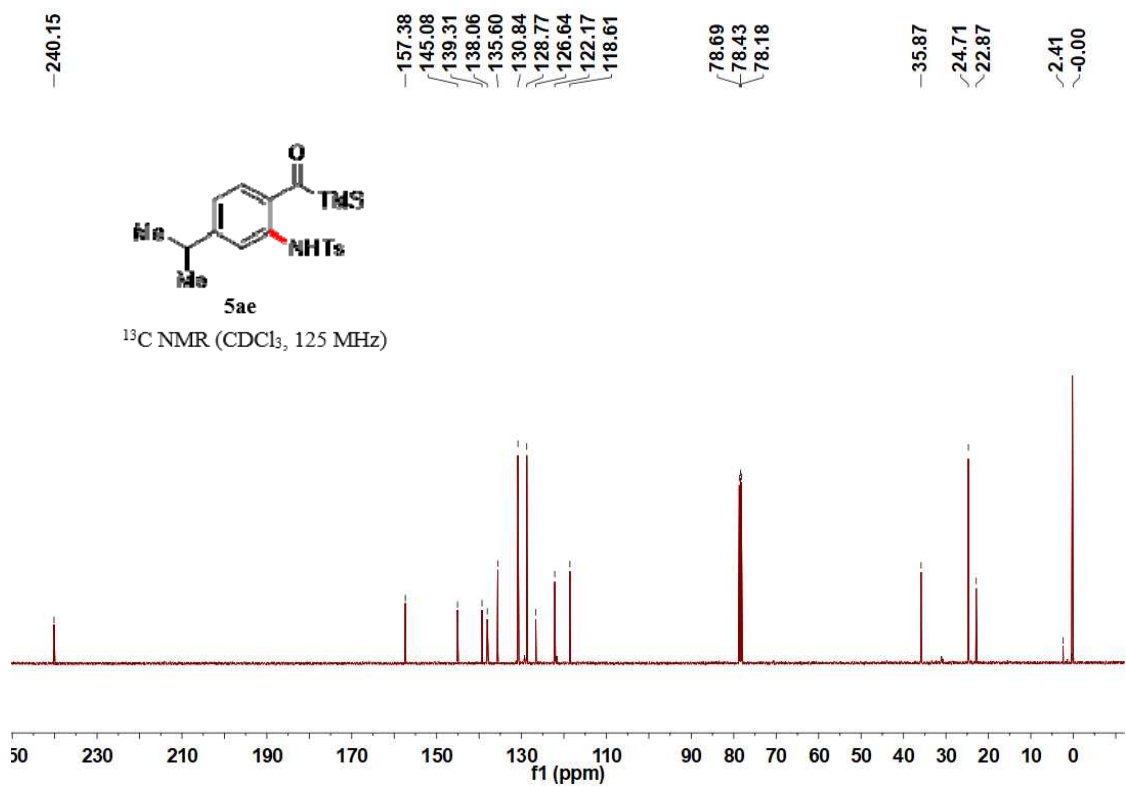

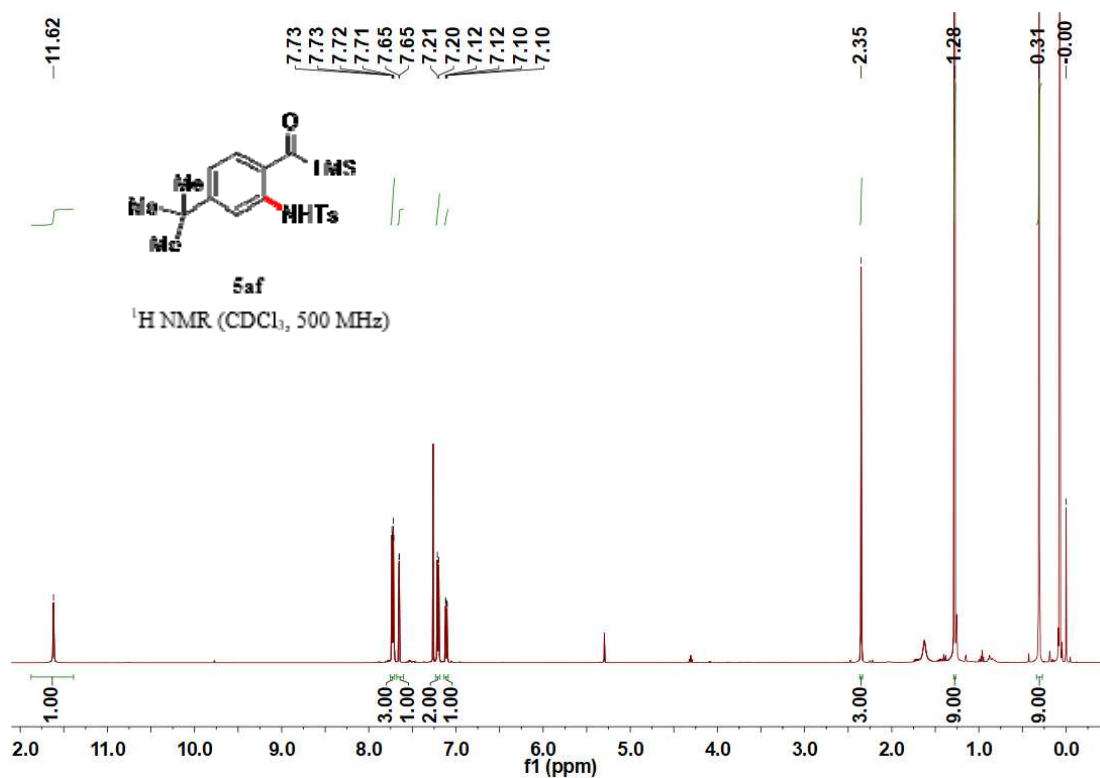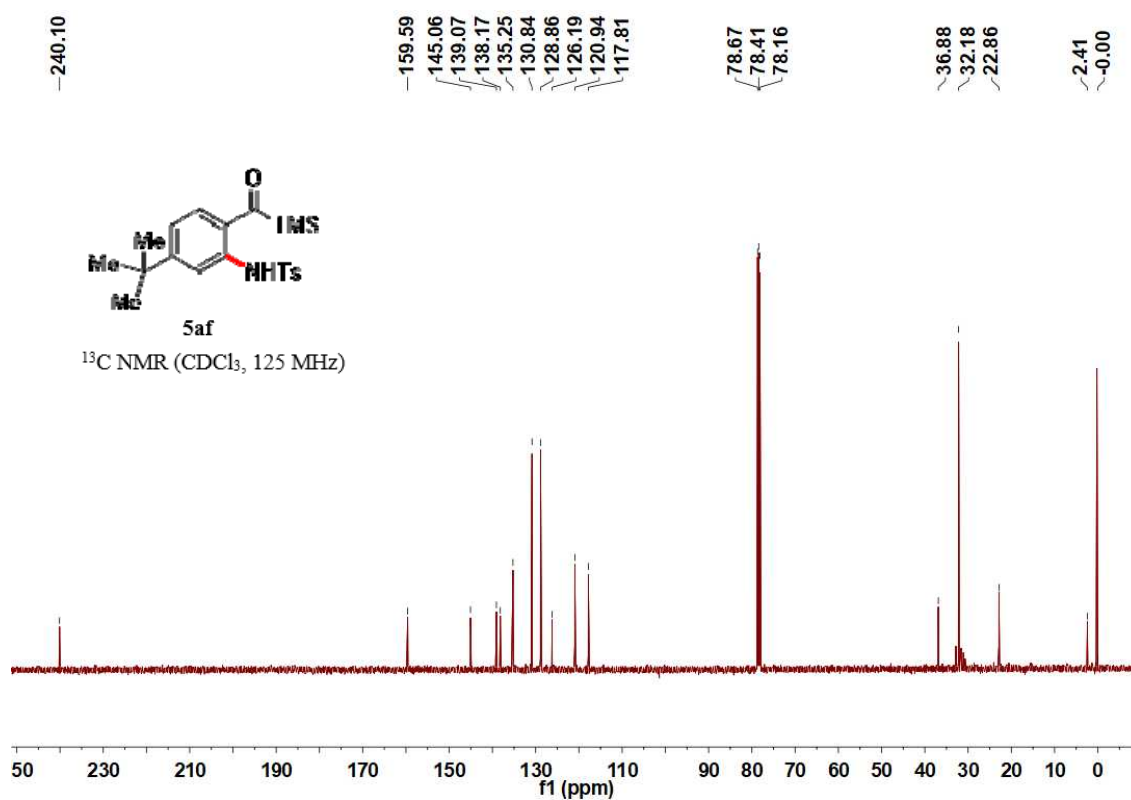

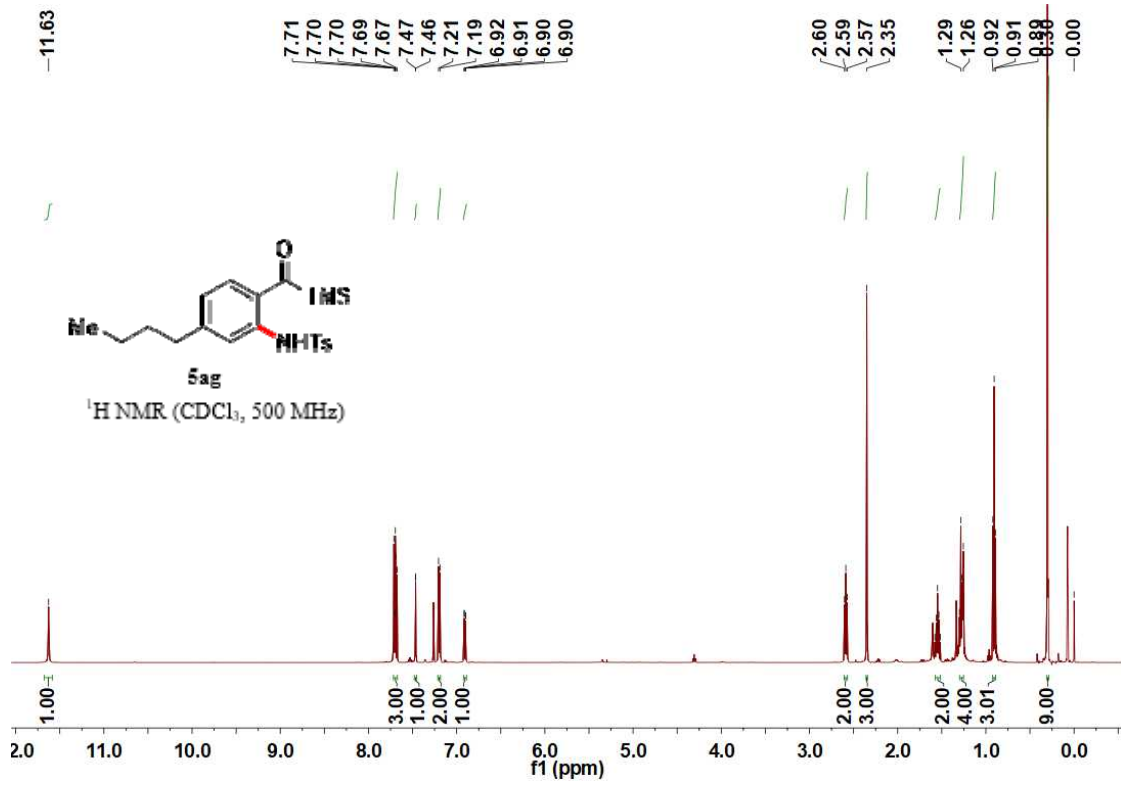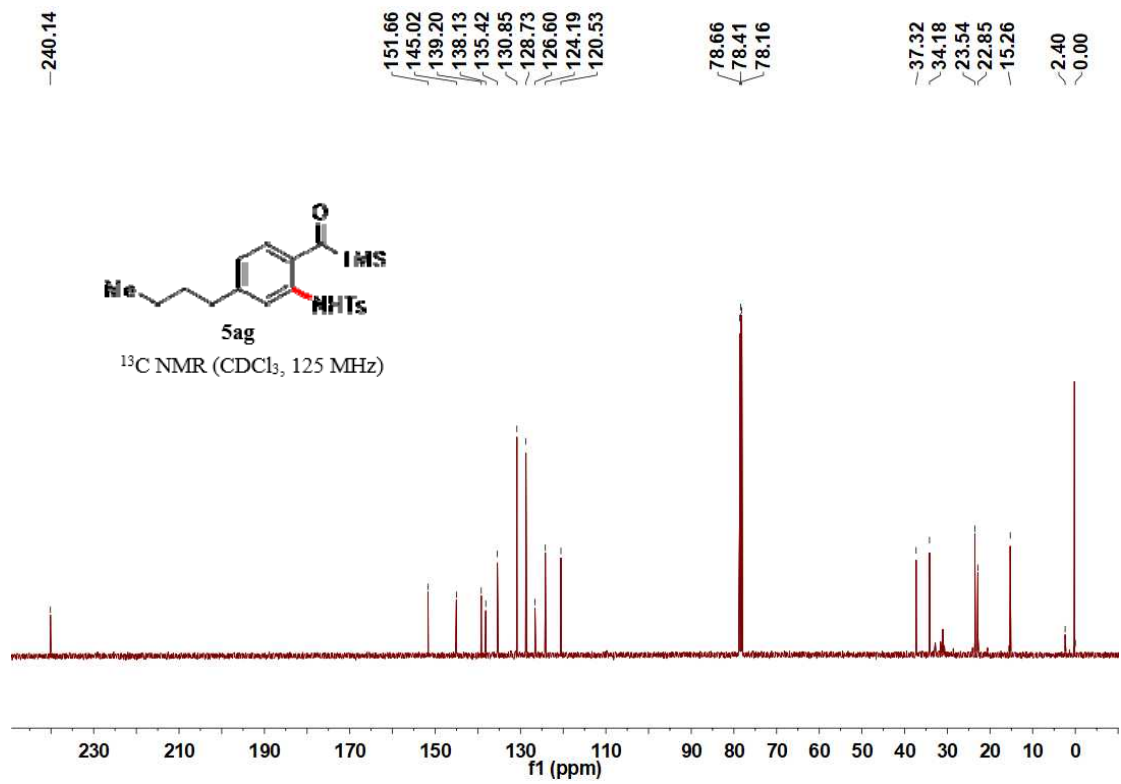

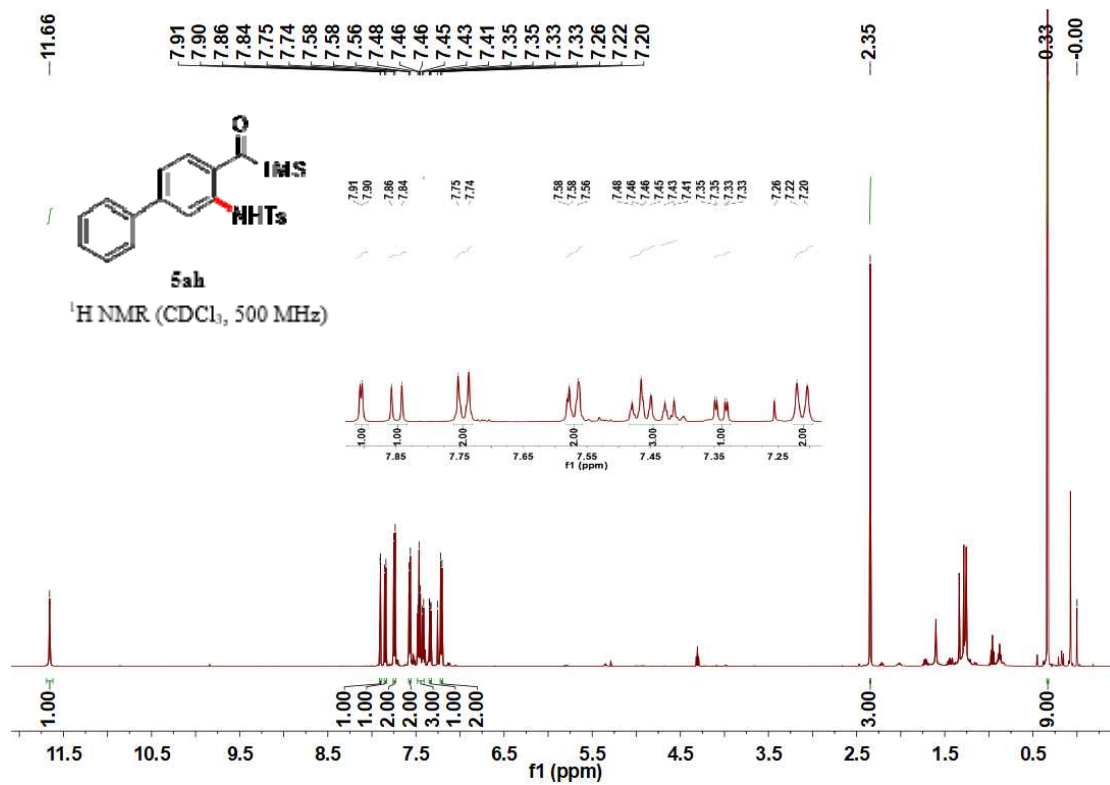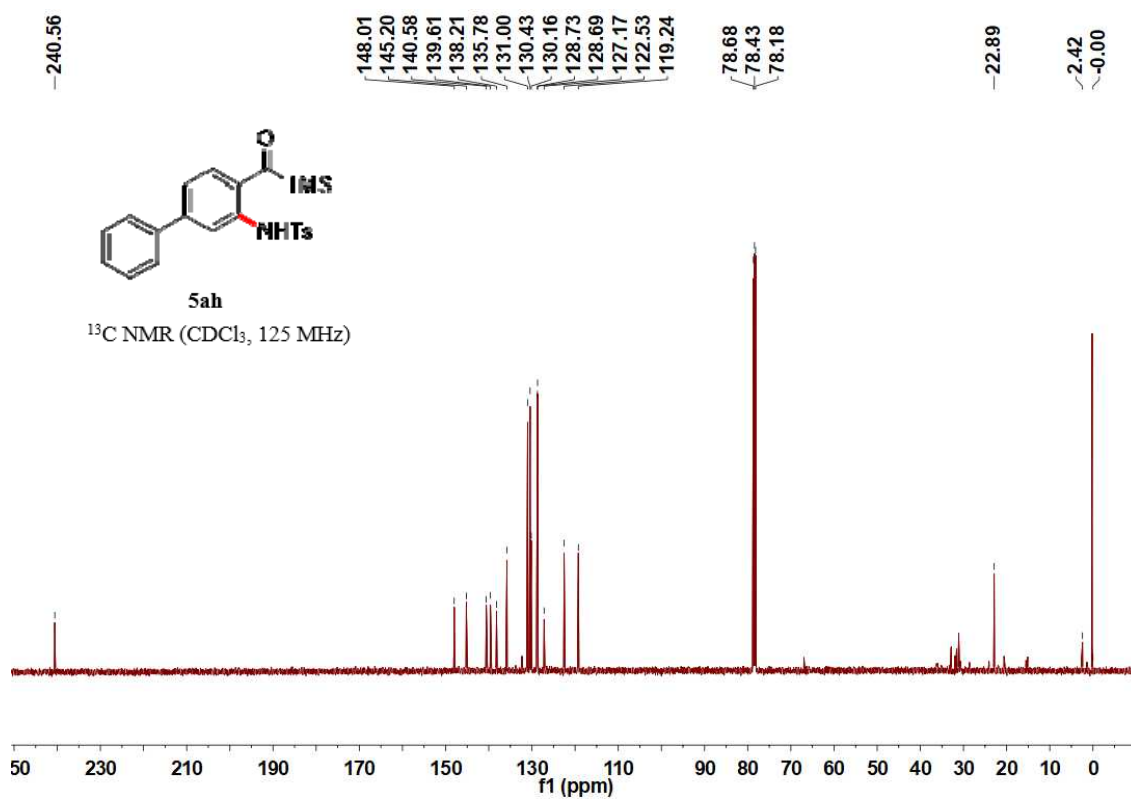

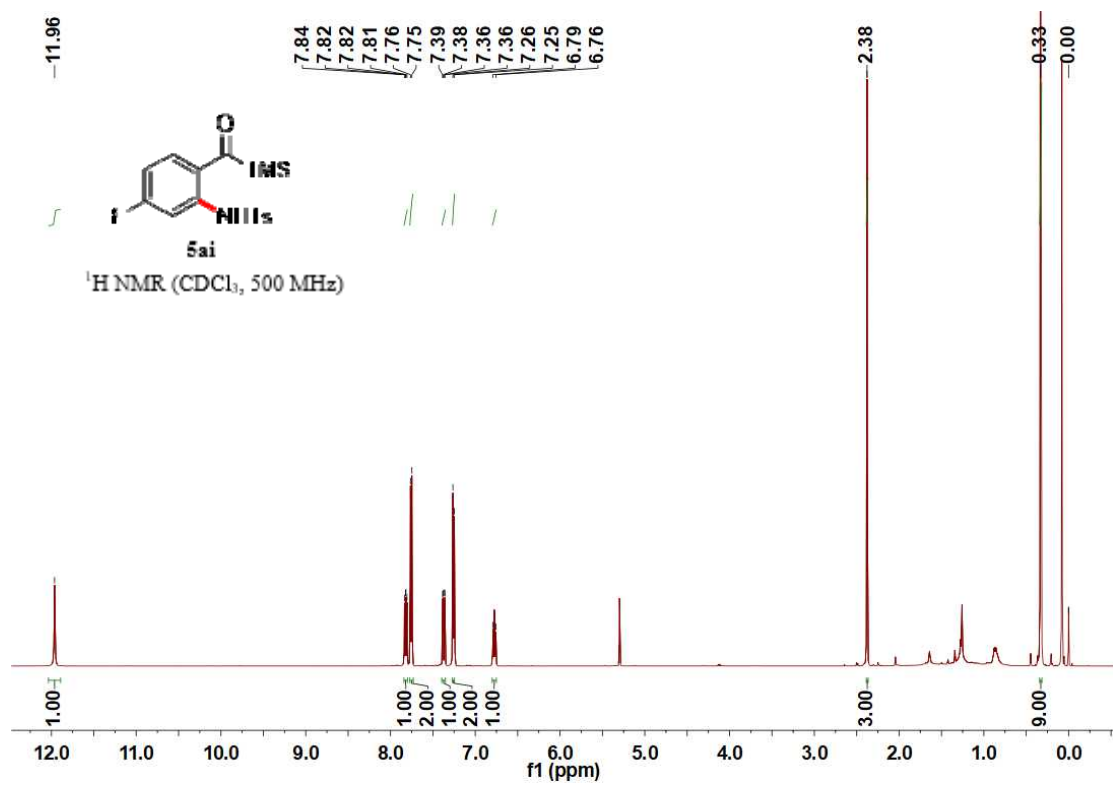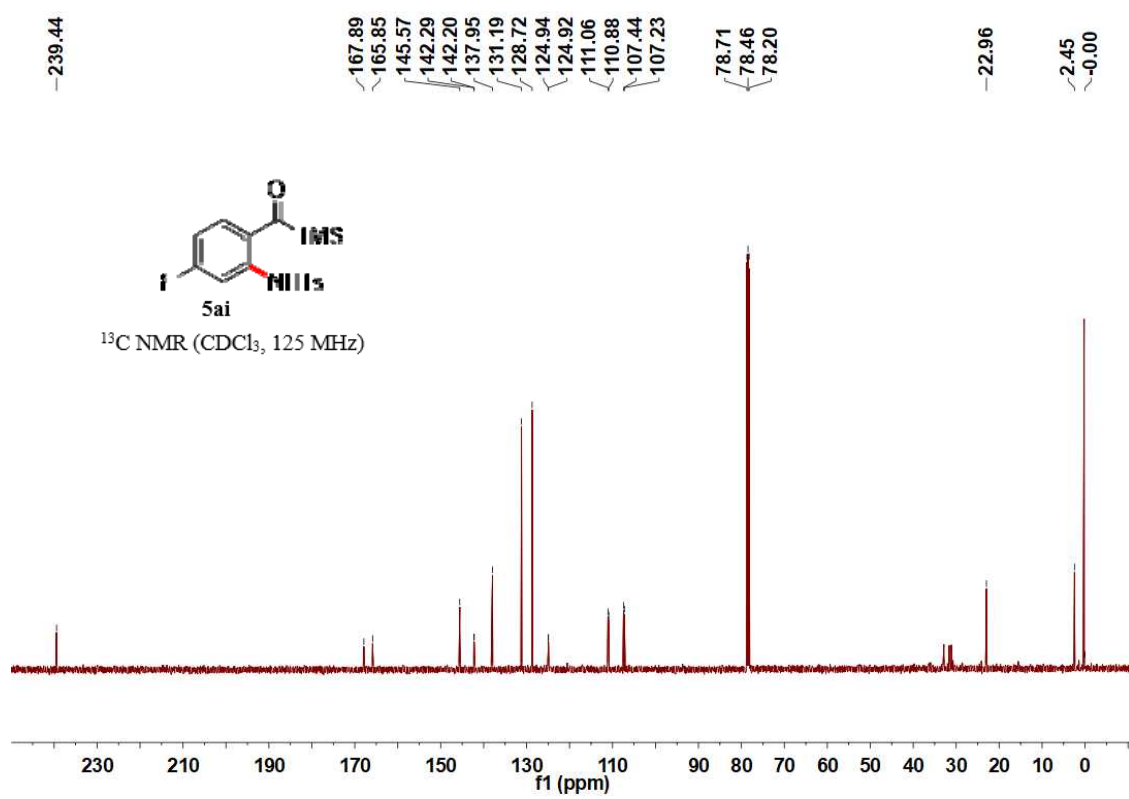

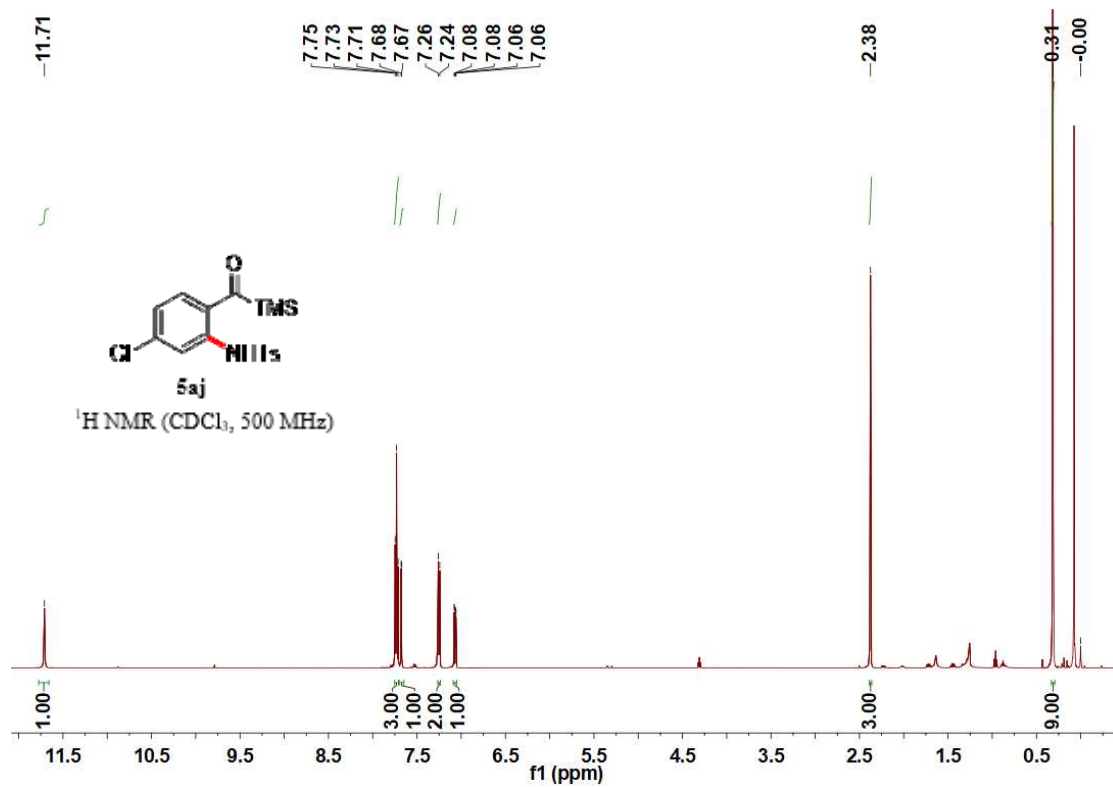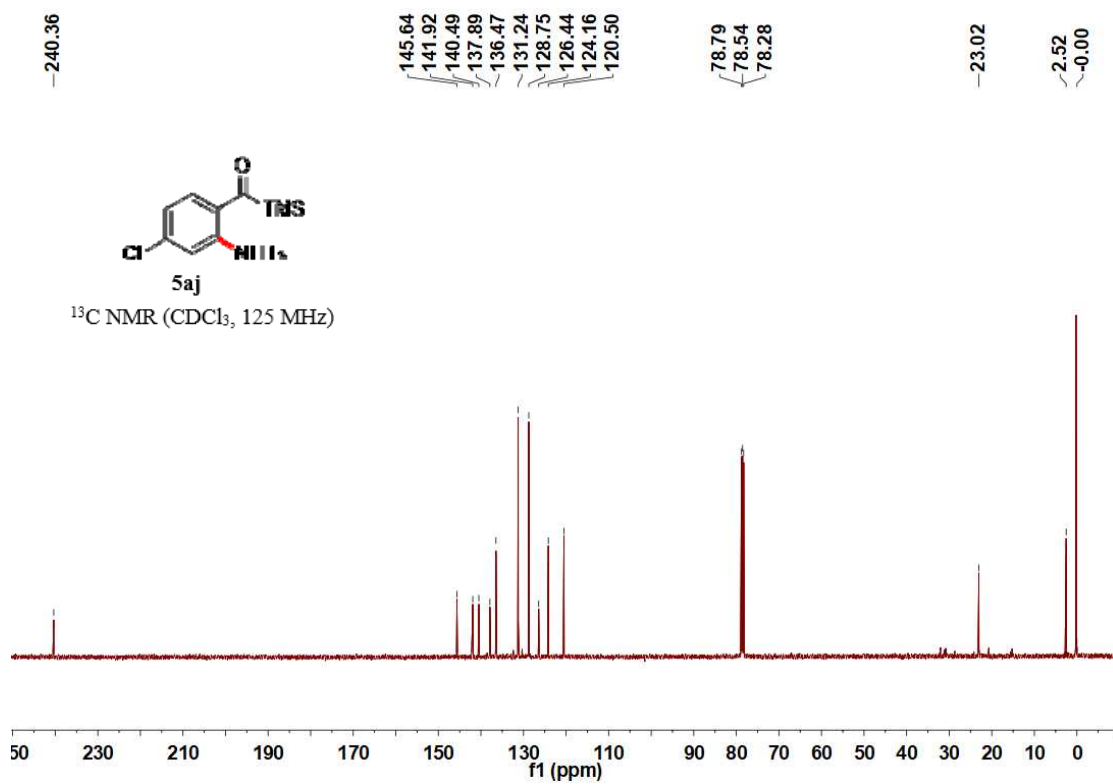

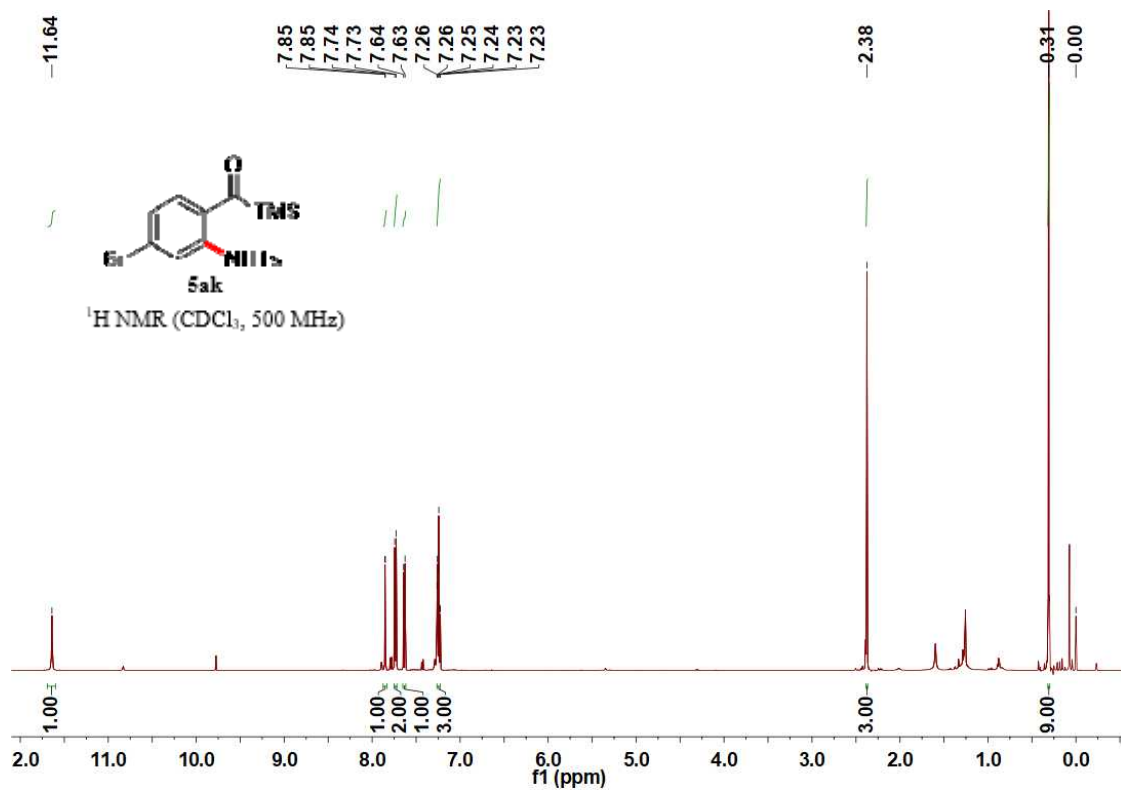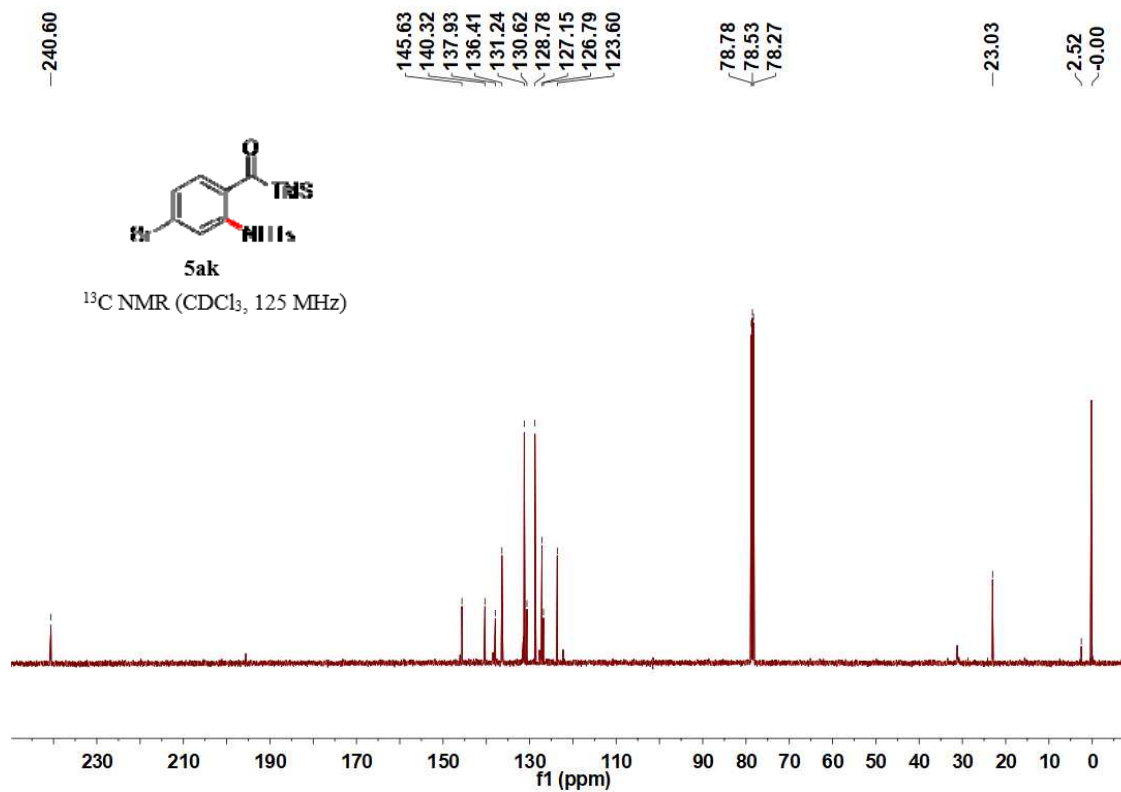

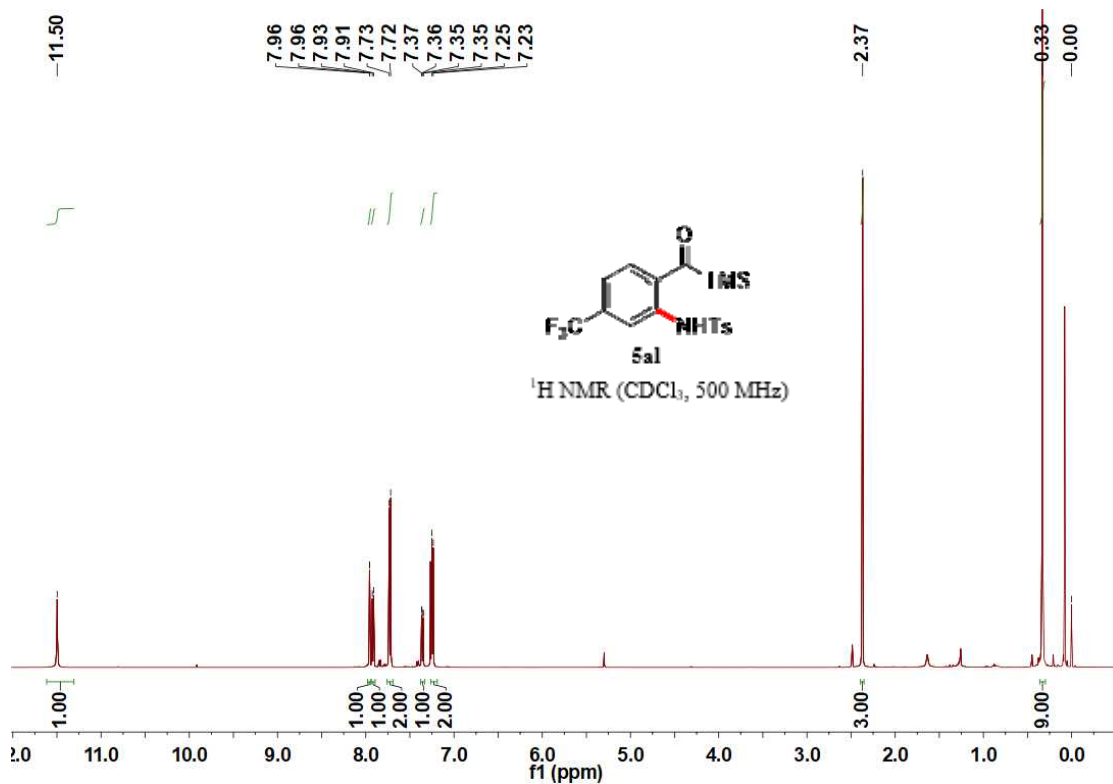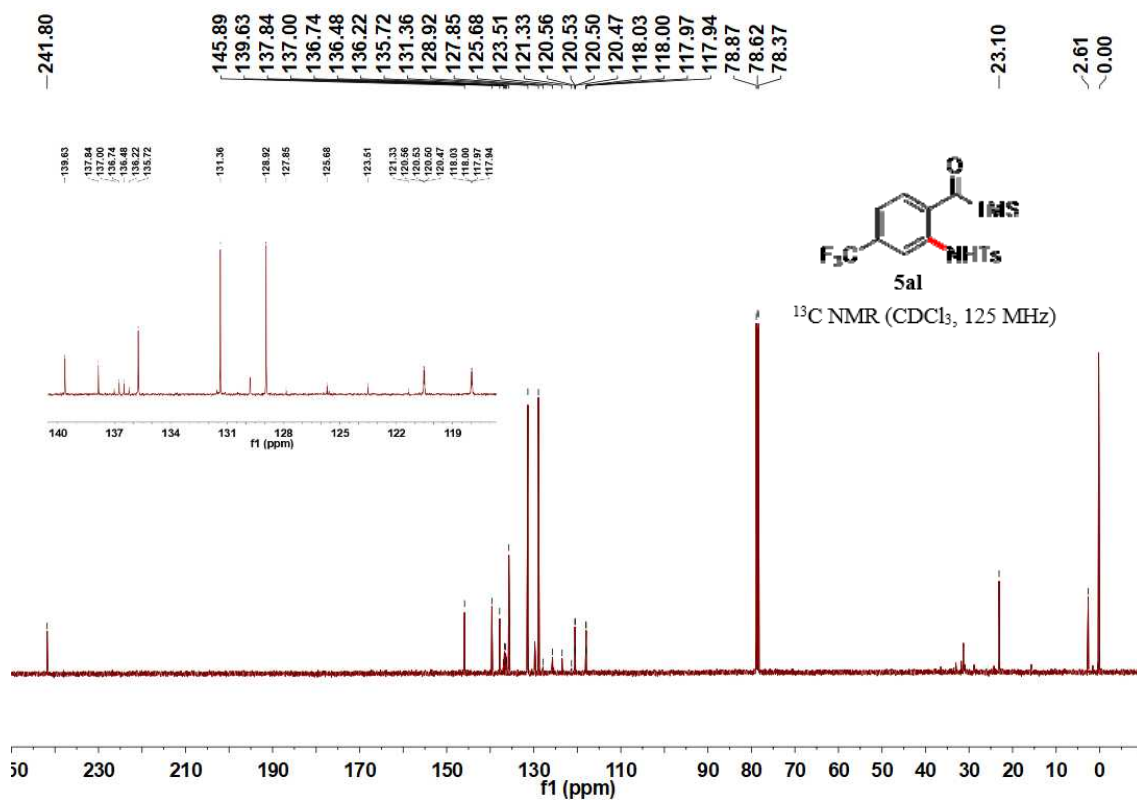



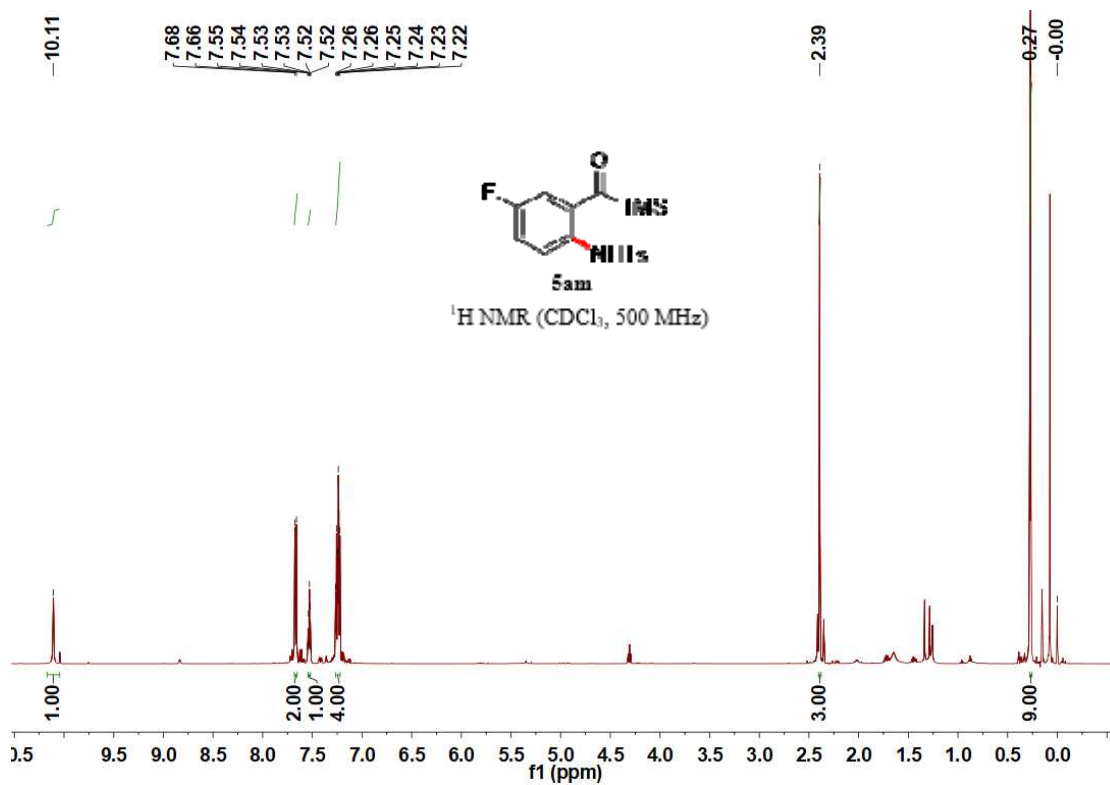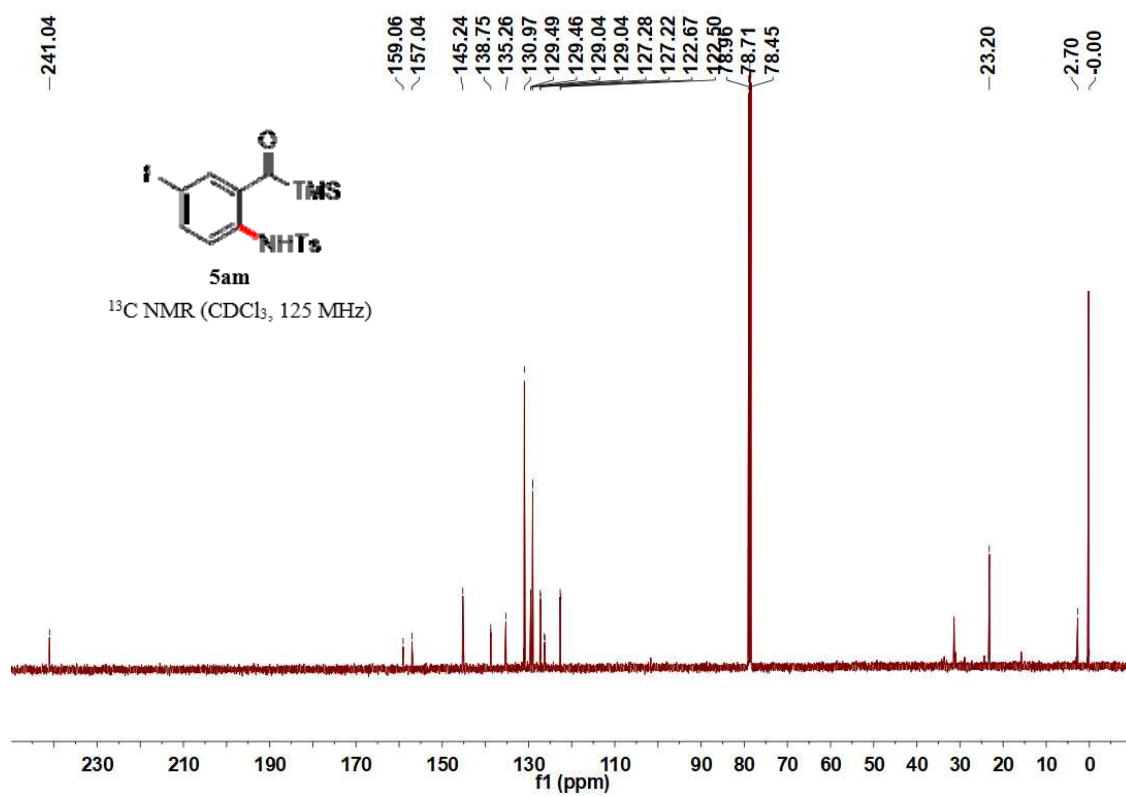

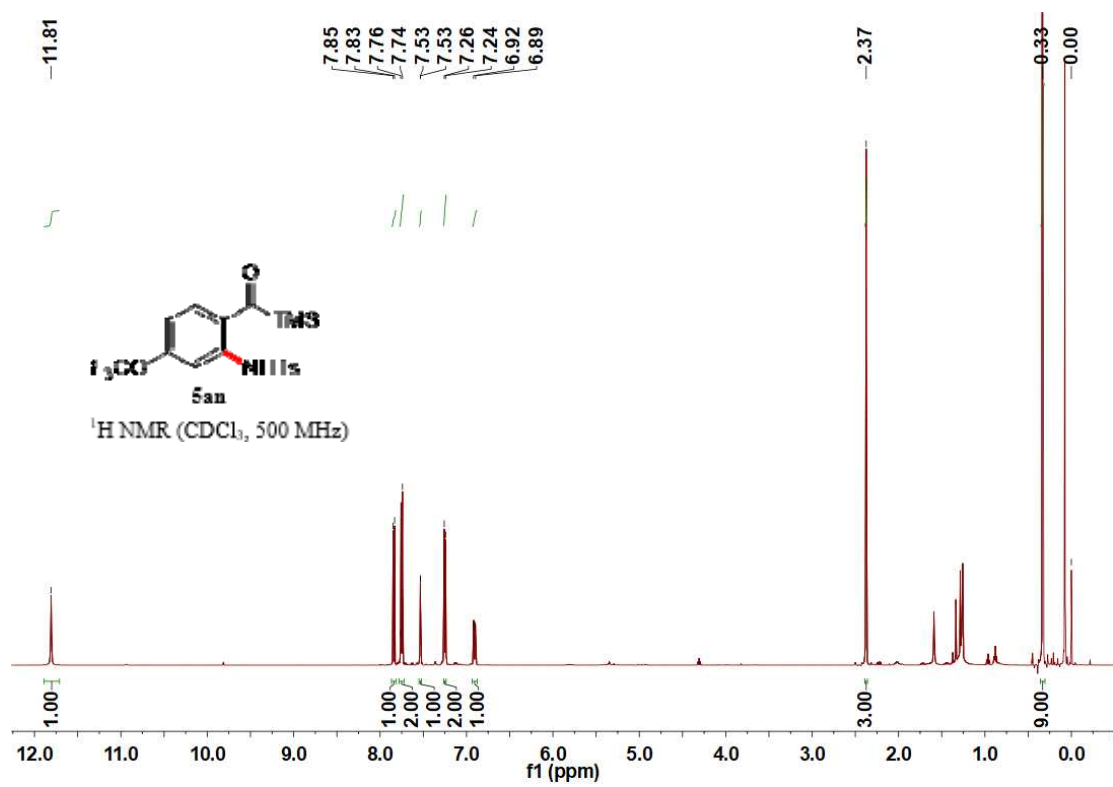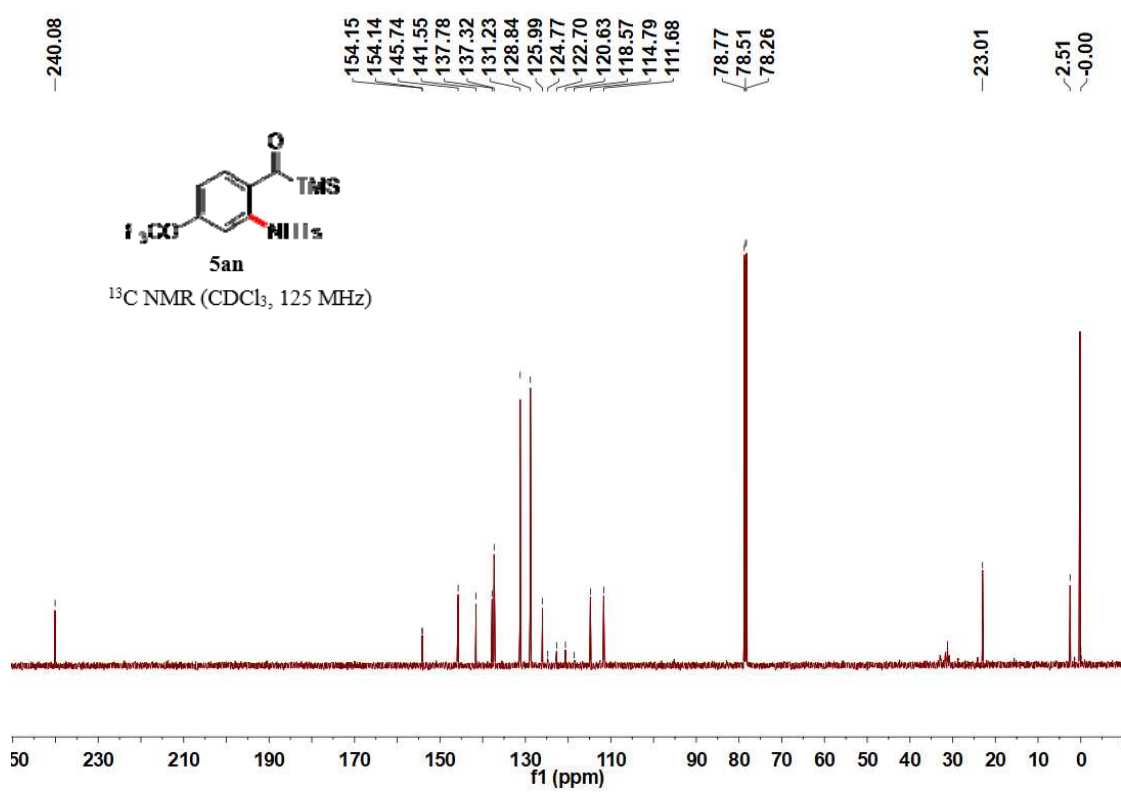

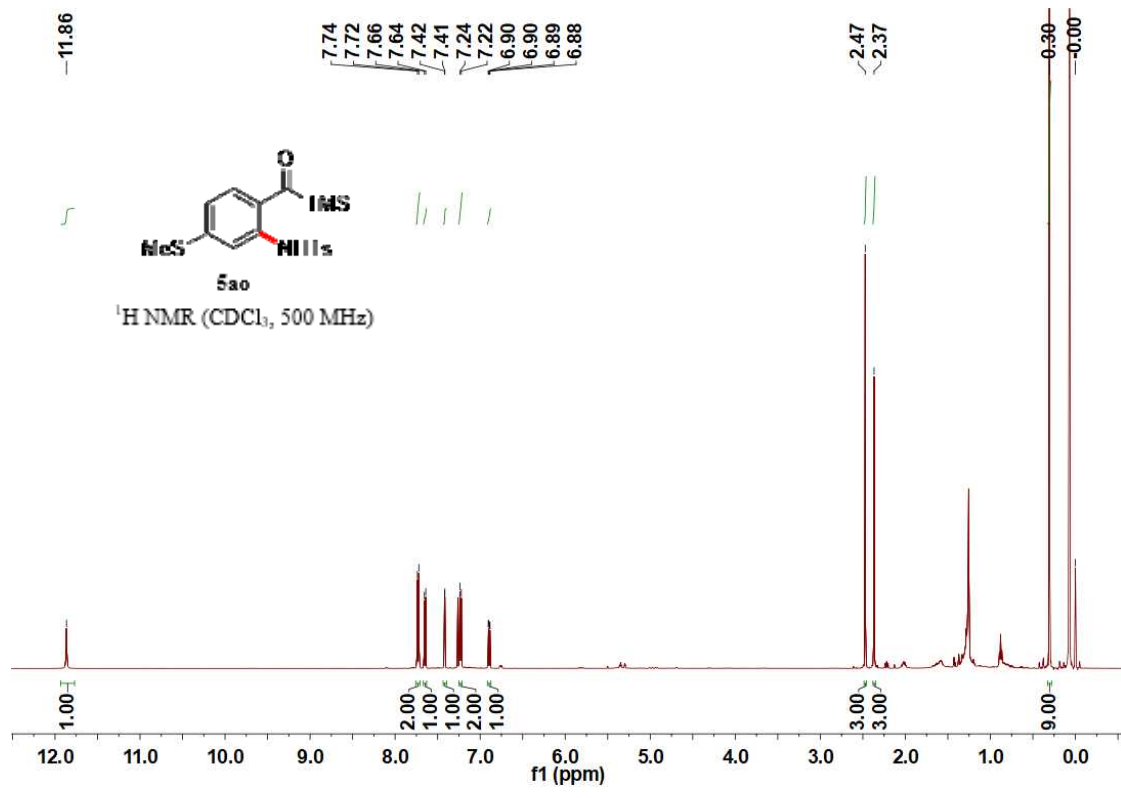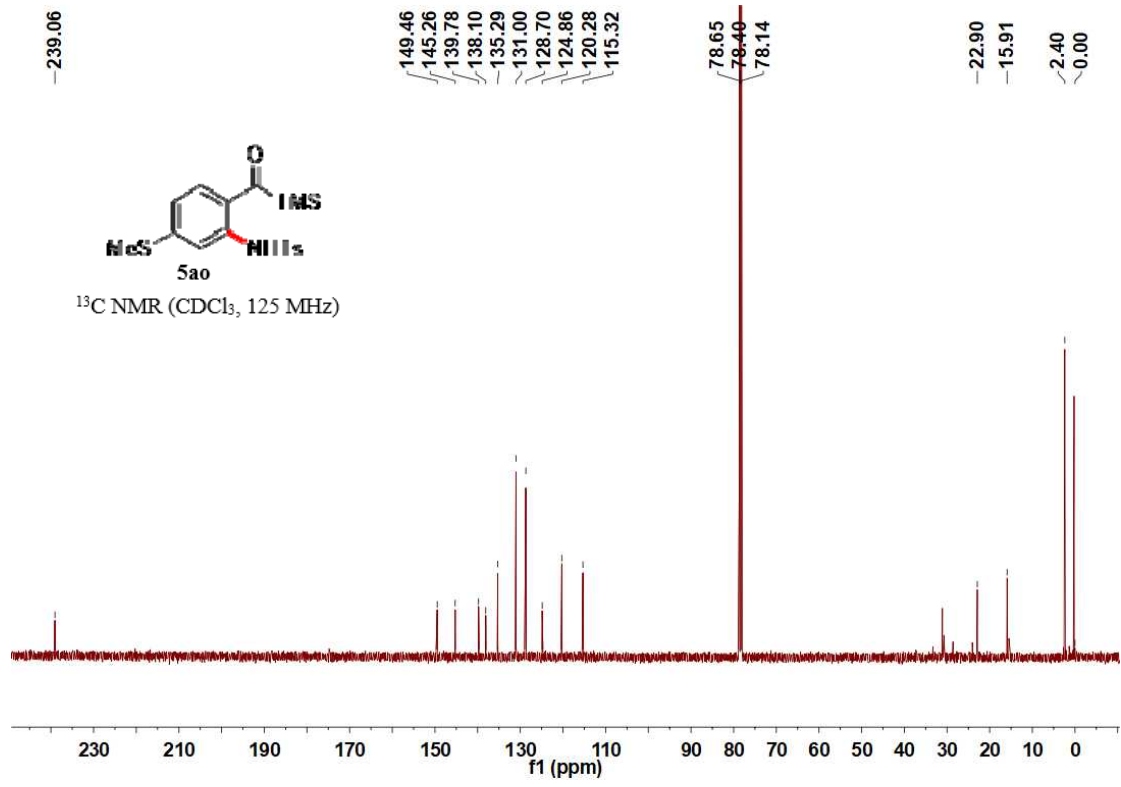

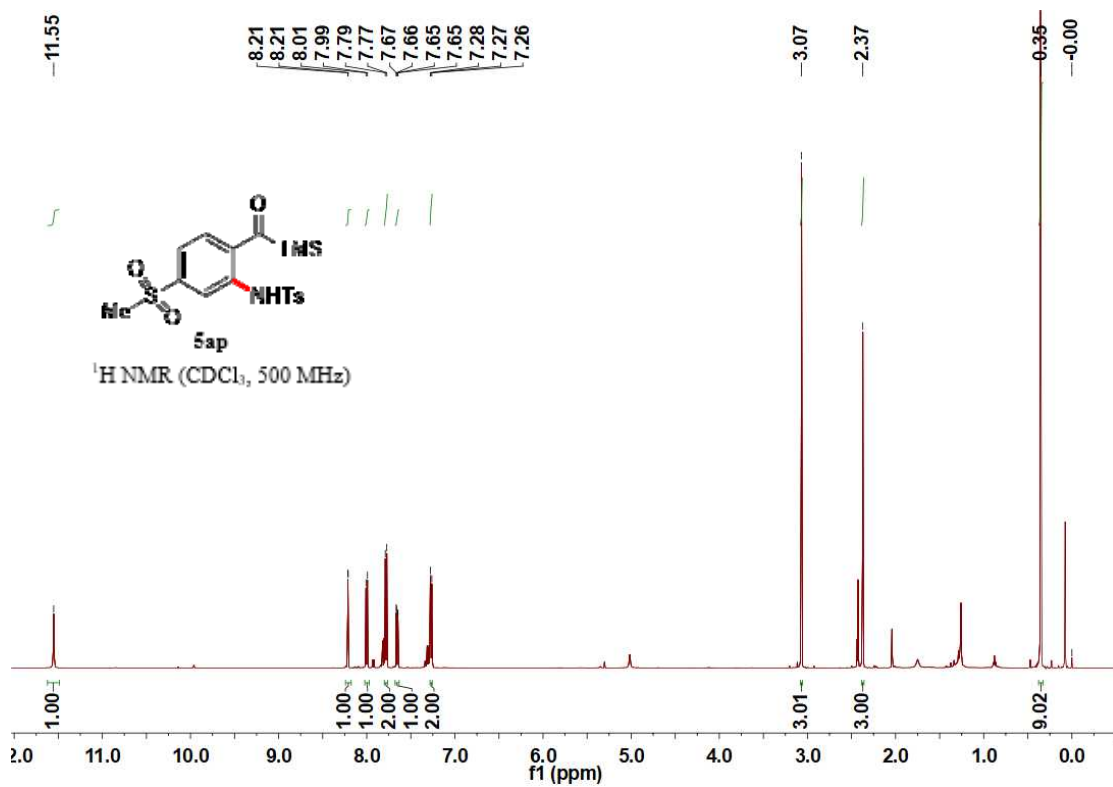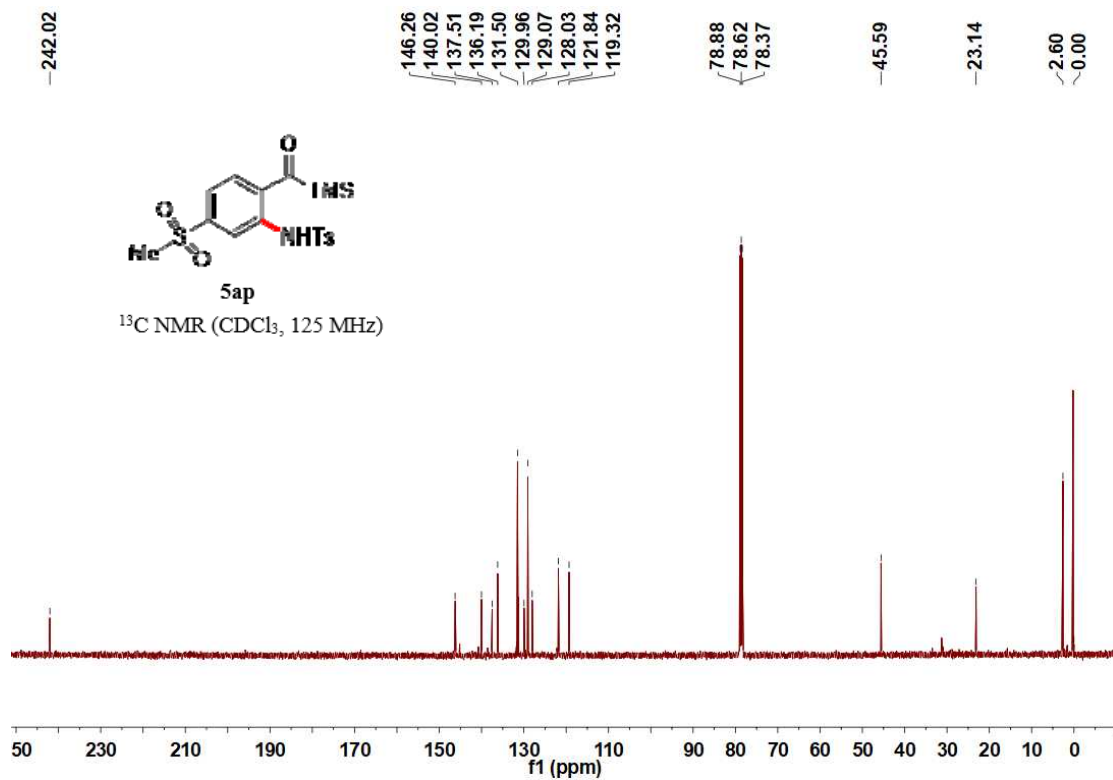

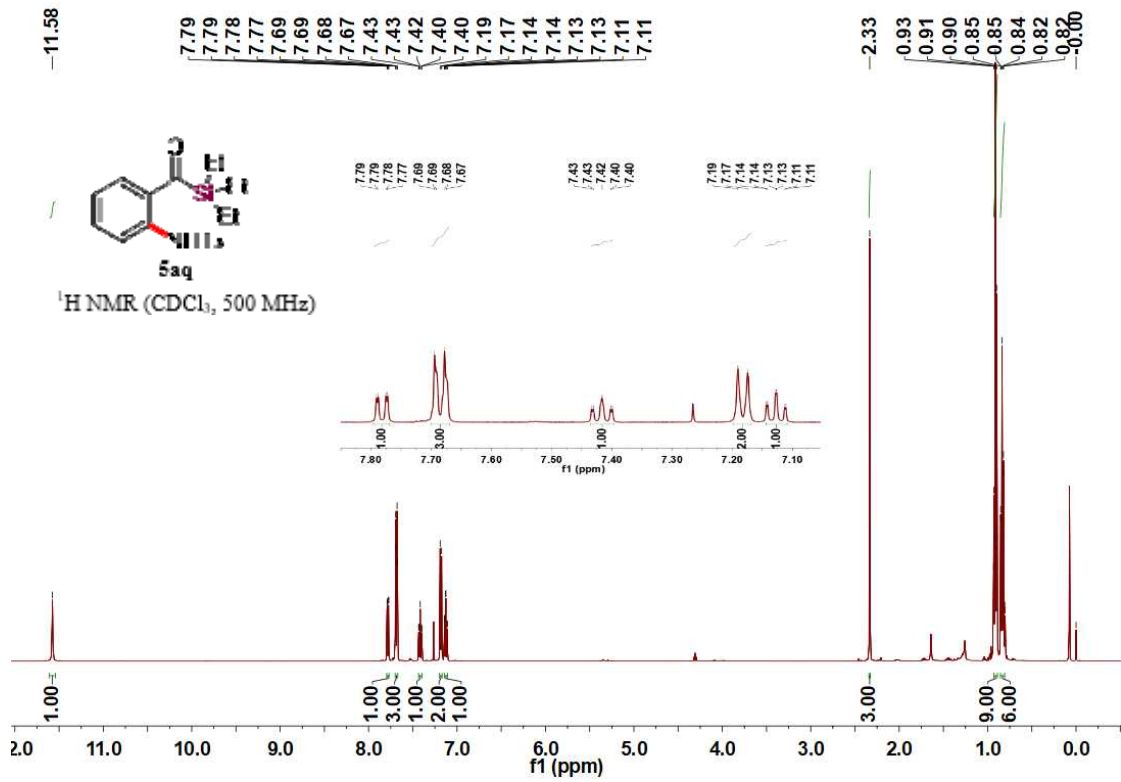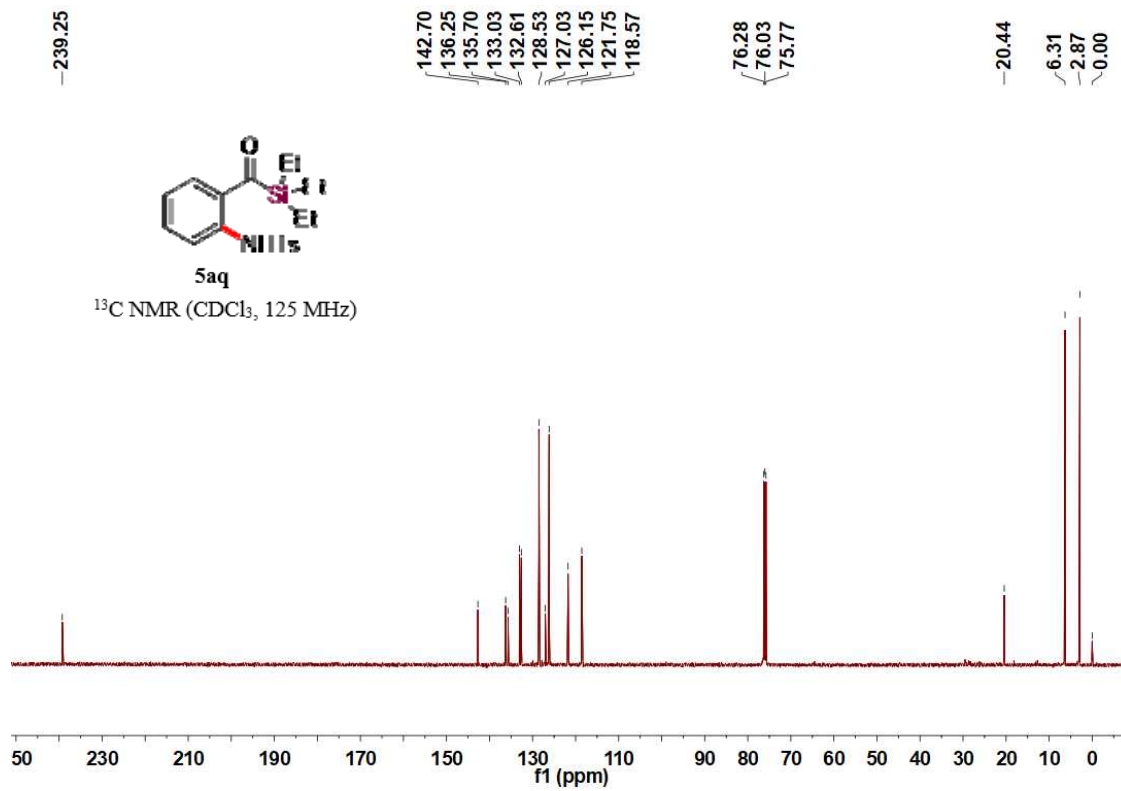

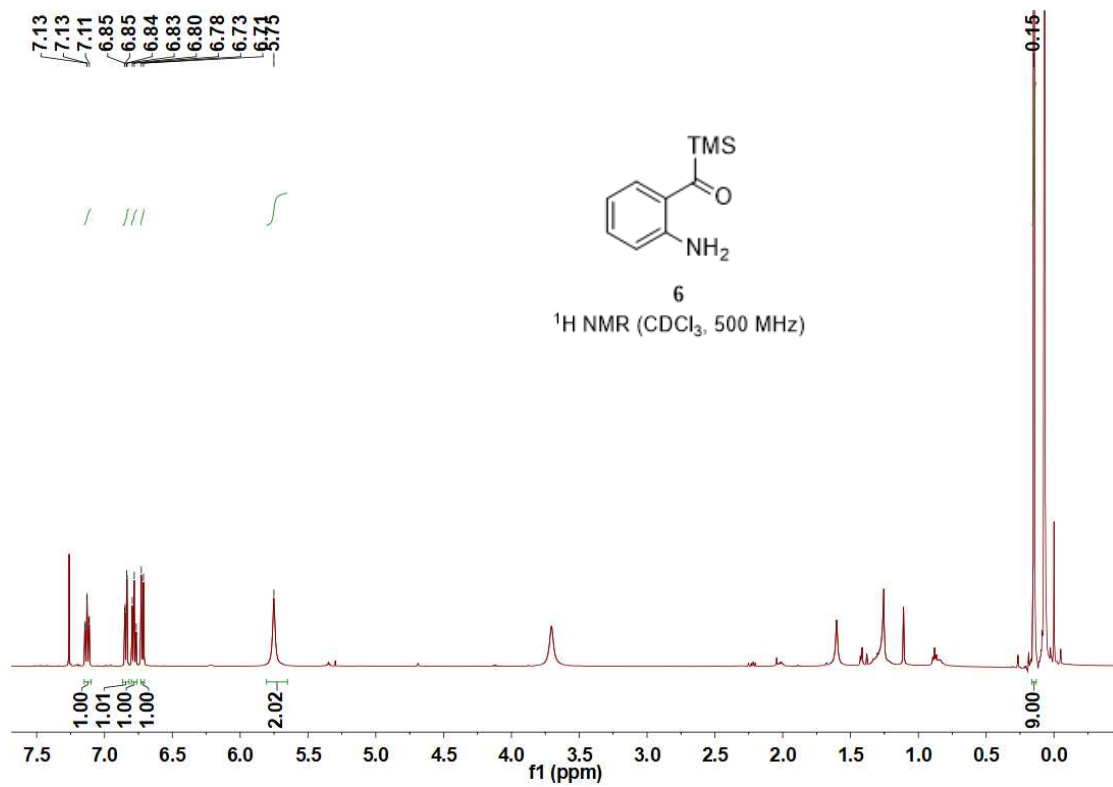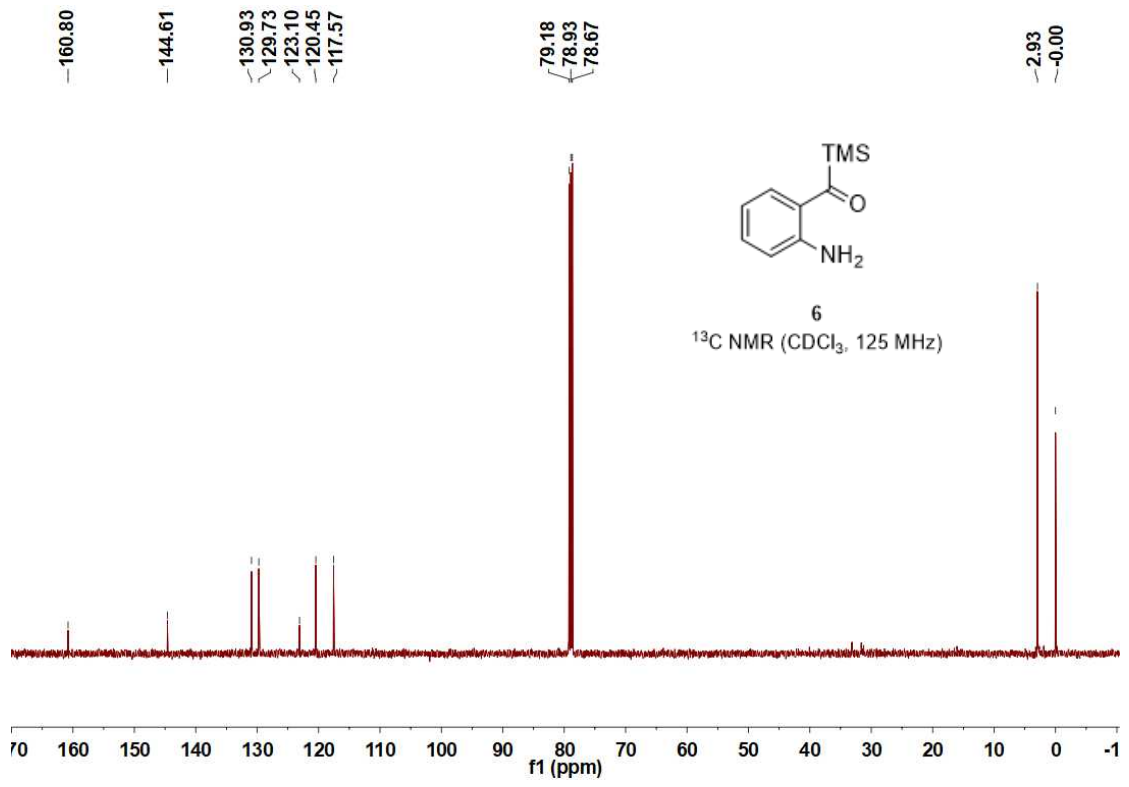

YFF-SYL-YS-1-2-0516.10.fid  
PROTON CDC13 E:\ \ CY 1

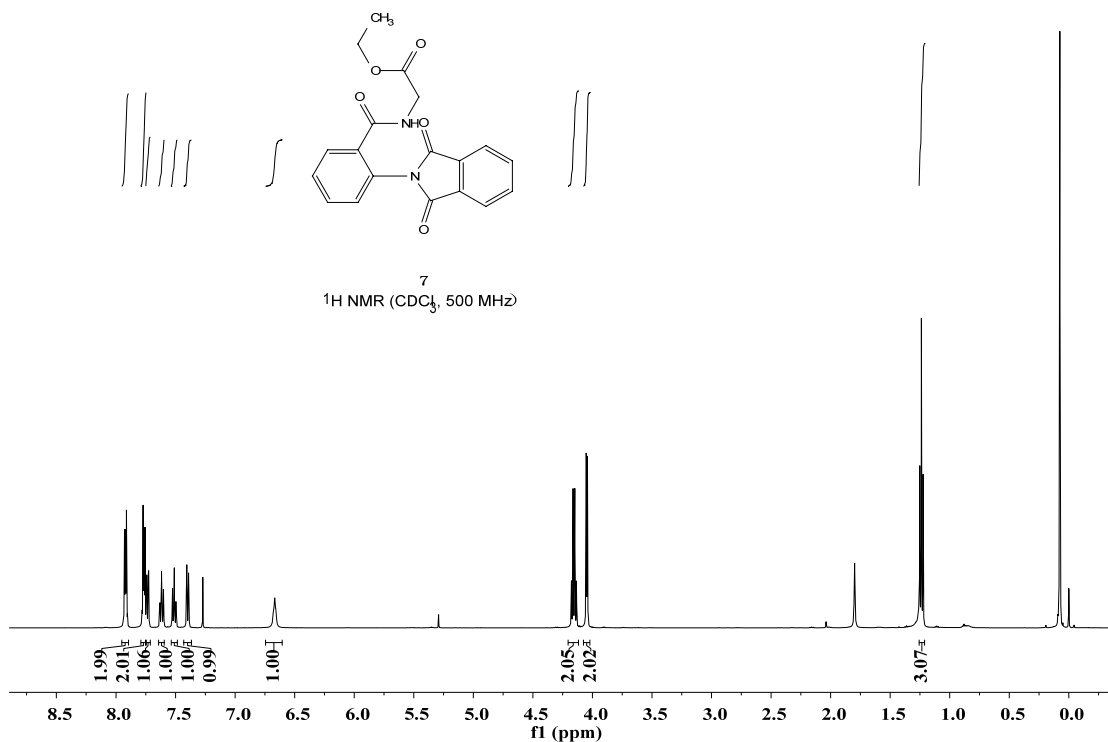

YFF-SYL-YS-1-2-0516.11.fid  
C13CPD CDC13 E:\ \ CY 1

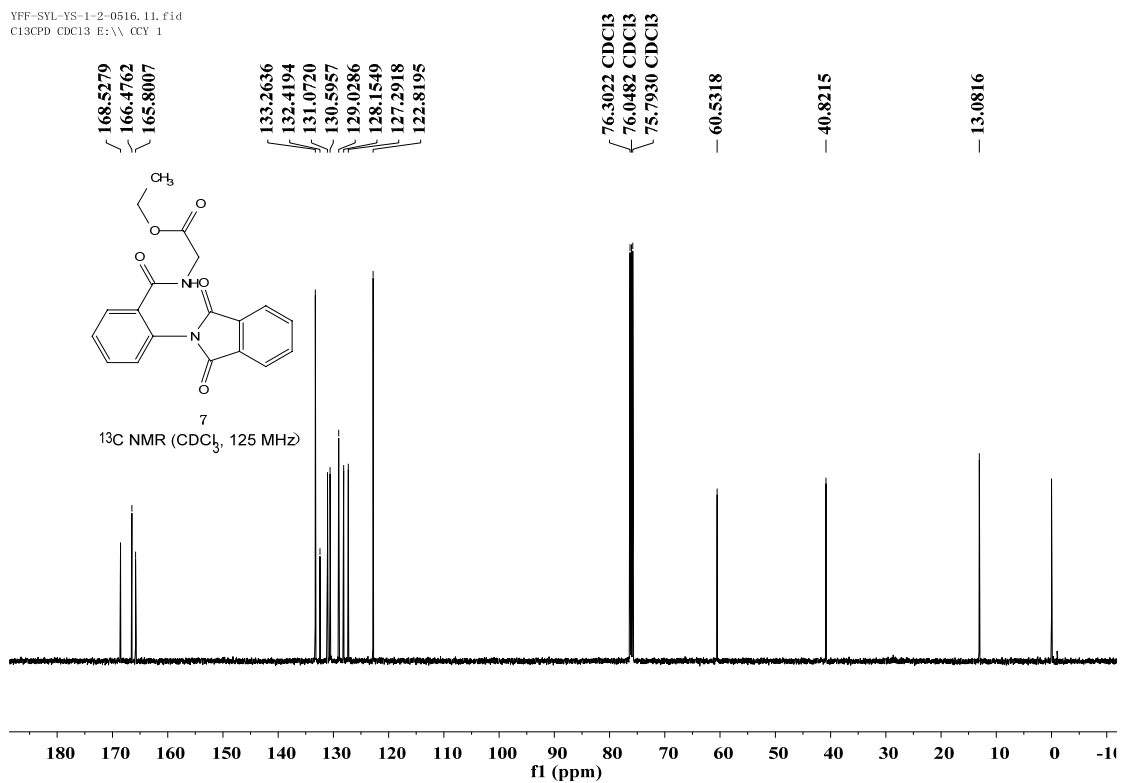

YFF-SYL-YS-1-1-0614.10.fid  
PROTON CDC13 E:\ \ CY 21

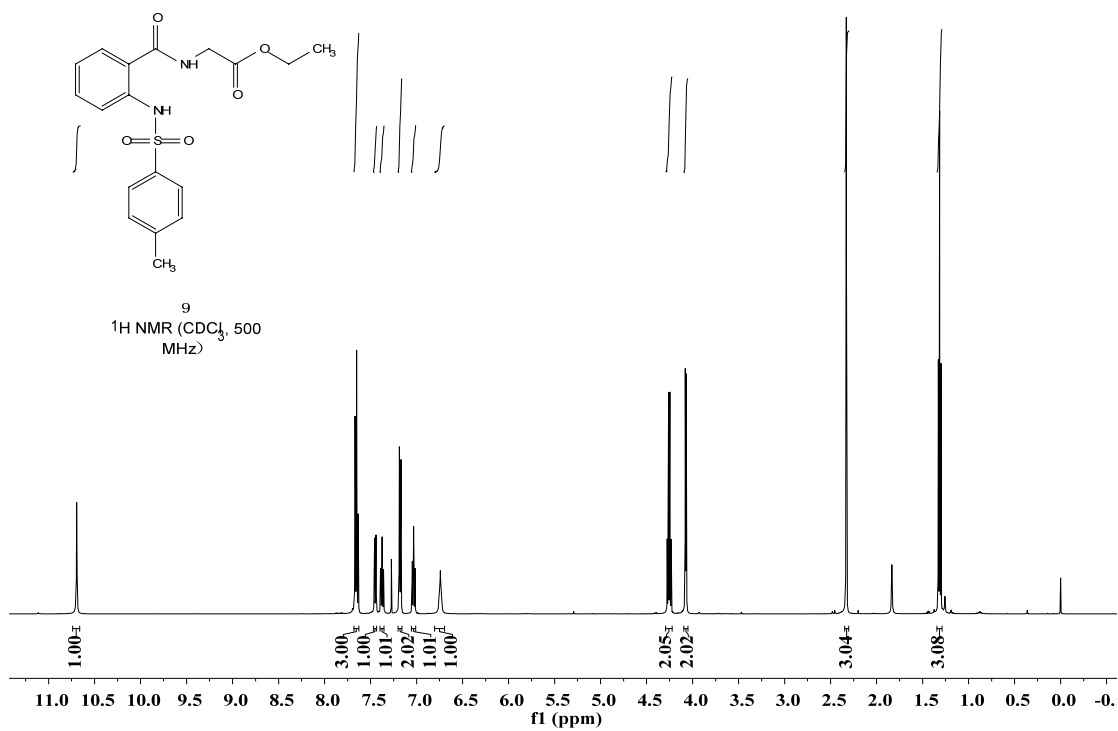

YFF-SYL-YS-1-1-0614.11.fid  
C13CPD CDC13 E:\ \ CY 21

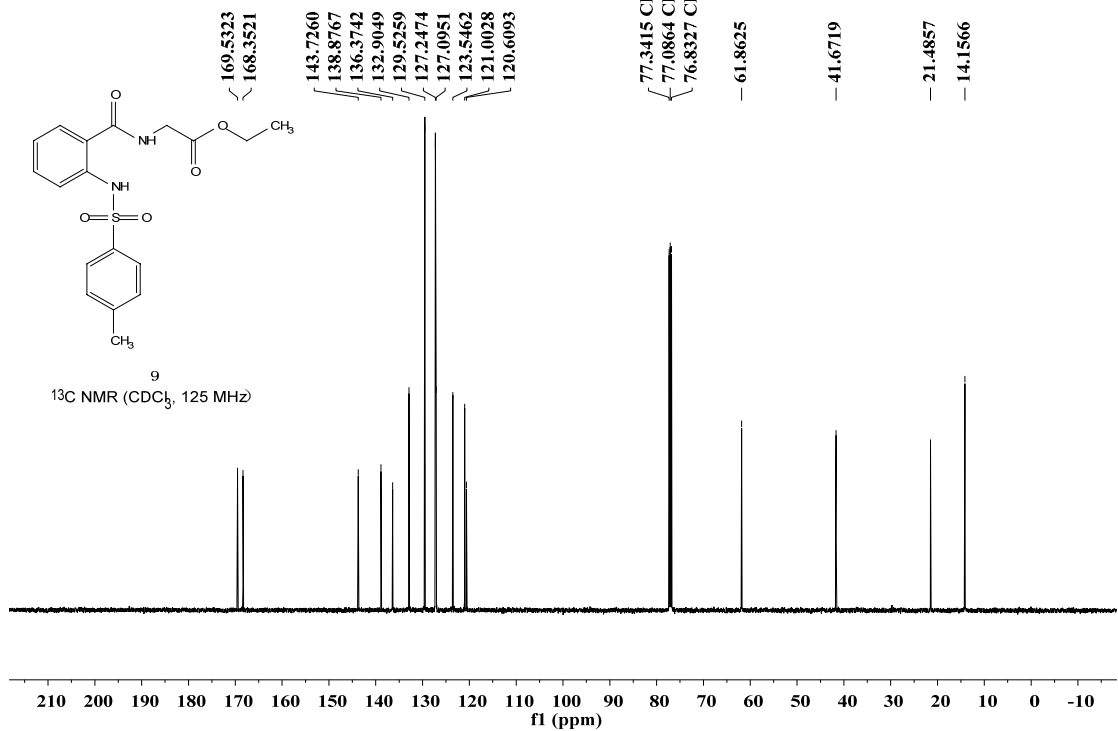



YFF-SYL-YS-4-1-0612.10.fid  
PROTON CDC13 E:\ \ CY 4

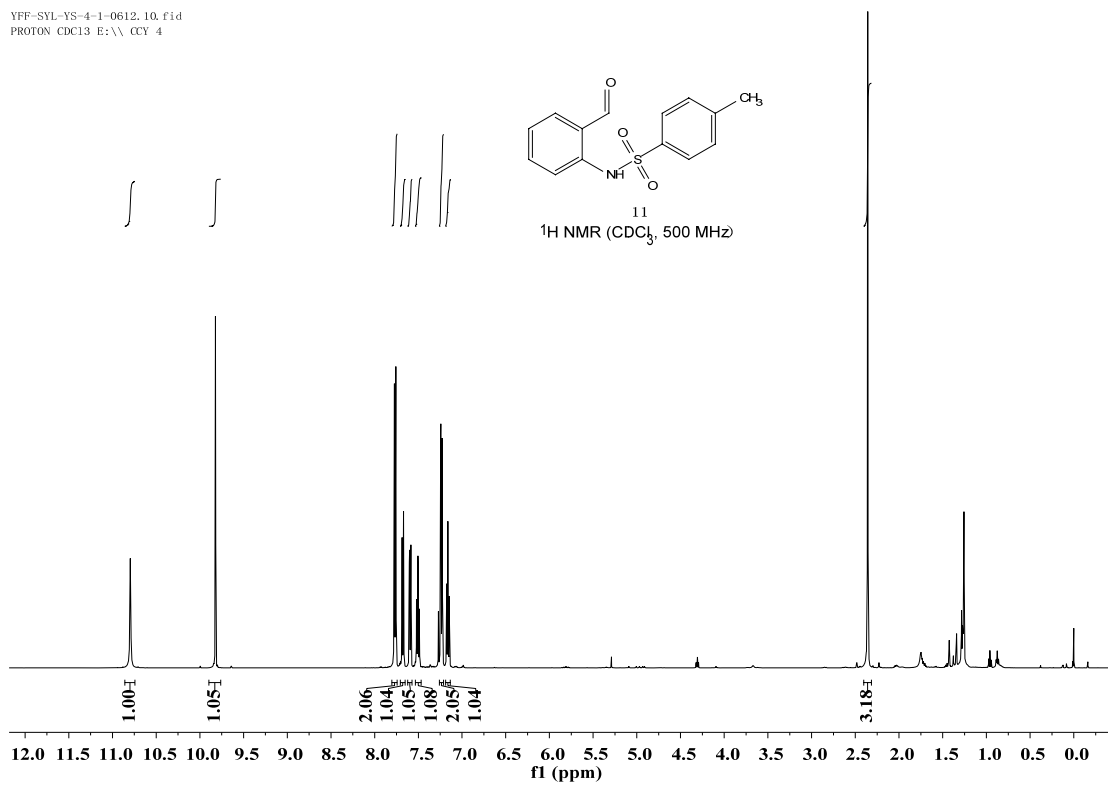

YFF-SYL-YS-4-1-0612.20.fid  
C13CPD CDC13 E:\ \ CY 4

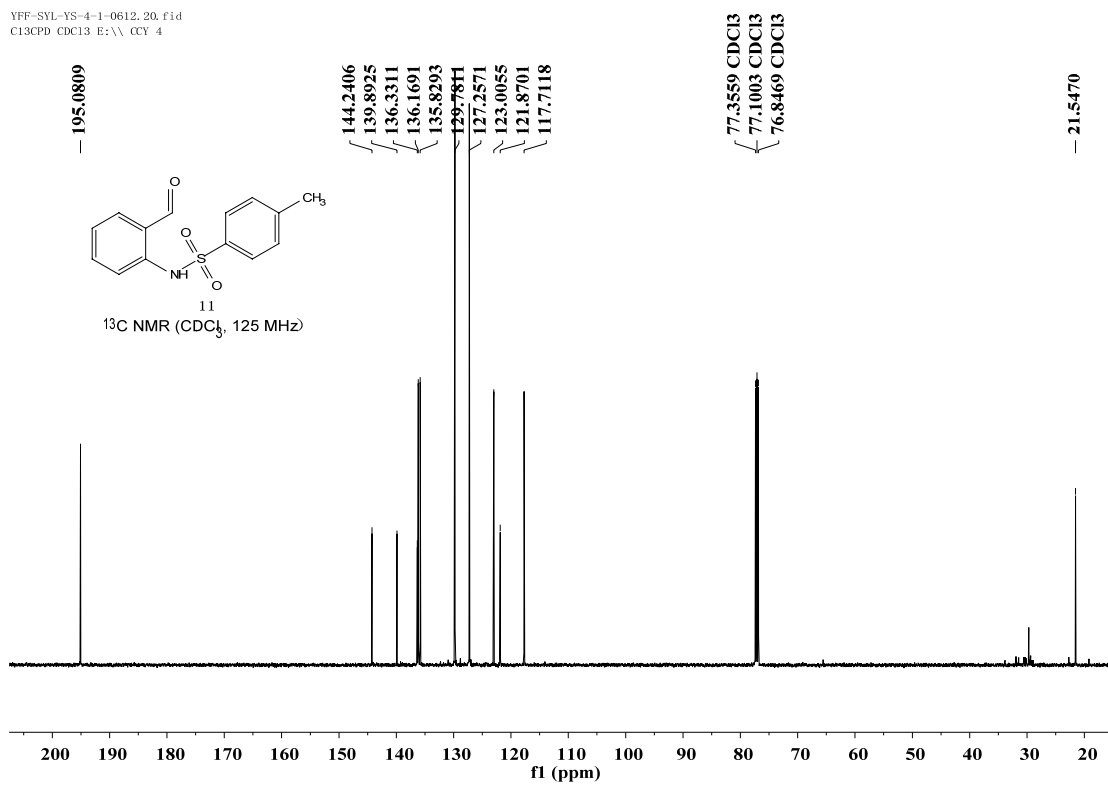

Supplement: d1ob00935d1.pdf [file d1ob00935d1.pdf]
